# Supplementary material for: Theoretical elucidation of the effect of the linkage and orientation of carbazole and naphthalenediimide on the TADF and RTP propensities
Source: Royal Society of Chemistry journal article supplement (doi:10.1039/d4cp02636e), 2024-10-08
Supplement: d4cp02636e1.pdf [file d4cp02636e1.pdf]

# Electronic Supplementary Information

## Theoretical Elucidation of the Effect of Linkage and Orientation of Carbazole on the Naphthalenediimide and the TADF and RTP Propensity

*Chetan Saini, Siddan Gouthaman, K. R. Justin Thomas\**

Organic Materials Laboratory, Department of Chemistry, Indian Institute of Technology

Roorkee, Roorkee – 247667, India.

\*Corresponding author. E-mail: krjt@cy.iitr.ac.in

### Supporting Information

|                                                                                                                                                                    |        |
|--------------------------------------------------------------------------------------------------------------------------------------------------------------------|--------|
| Computational Methodology                                                                                                                                          | S3     |
| <b>Figure S1.</b> $S_0$ , $S_1$ and $T_1$ optimized geometries in the gaseous state of the investigated molecules.                                                 | S4     |
| <b>Figure S2.</b> Frontier orbital distribution at the optimized $S_0$ geometries for the investigated molecules.                                                  | S4     |
| <b>Figure S3.</b> Calculated absorption of the proposed molecules using benchmark functional SOGGA11X/6-31+g(d).                                                   | S5     |
| <b>Figure S4.</b> Theoretical absorption spectra are generated using the Molden program with FWHM of 0.25 eV for all twelve molecules.                             | S5-9   |
| <b>Figure S5 (a-b).</b> Natural transition orbitals (NTOs) of the $S_1$ and $T_1$ states for the investigated molecules at $S_1$ and $T_1$ geometry, respectively. | S10-11 |
| <b>Figure S6 (a).</b> HDI at $S_1$ and $T_1$ state at $S_1$ and $T_1$ geometry of the proposed molecules.                                                          | S12    |
| <b>Figure S6 (b).</b> EDI at $S_1$ and $T_1$ state at $S_1$ and $T_1$ geometry of the proposed molecules.                                                          | S12    |
| <b>Figure S7.</b> $\Lambda$ and $S_m$ index at $S_1$ and $T_1$ geometry of the proposed molecules.                                                                 | S13    |
| <b>Figure S8.</b> $S_r$ index at $S_1$ and $T_1$ geometry of the proposed molecules.                                                                               | S13    |
| <b>Figure S9 (a).</b> %CT at $S_1$ geometry of the proposed molecules.                                                                                             | S14    |
| <b>Figure S9 (b).</b> %LE at $T_1$ geometry of the proposed molecules.                                                                                             | S14    |
| <b>Figure S10.</b> D index at $S_1$ and $T_1$ geometry of the proposed molecules.                                                                                  | S15    |
| <b>Figure S11.</b> t index at $S_1$ and $T_1$ geometry of the proposed molecules.                                                                                  | S15    |
| <b>Figure S12 (a-l).</b> Qualitative analysis of the possibilities of ISC and RISC rates.                                                                          | S16-21 |
| <b>Figure S13 (a-d).</b> ISC and RISC rates of the investigated molecules vs external reorganization energy range.                                                 | S21    |
| <b>Figure S14 (a-b).</b> The rate for the RISC process in the studied emitters as a function                                                                       | S22    |

|                                                                                                                                                         |        |
|---------------------------------------------------------------------------------------------------------------------------------------------------------|--------|
| of the external reorganization energy.                                                                                                                  |        |
| <b>Table S1.</b> Bond length and dihedral angle of TADF emitters at $S_0$ , $S_1$ , and $T_1$ optimized geometries.                                     | S23    |
| <b>Table S2.</b> Dihedral angles of the molecules at $S_0$ , $S_1$ and $T_1$ optimized geometries.                                                      | S23-24 |
| <b>Table S3.</b> $S_1$ and $T_1$ states calculated by the TDA-DFT approach at $S_1$ and $T_1$ optimized geometries in gaseous state.                    | S25    |
| <b>Table S4.</b> Benchmarking for absorption of the reported molecules ( <i>Cz2i</i> , <i>pCz2i</i> ).                                                  | S26    |
| <b>Table S5.</b> Absorption data calculated using benchmark function SOGGA11X/6-31+G(d).                                                                | S26    |
| <b>Table S6.</b> Charge transfer indices of TADF emitters at Singlet ( $S_1$ ) and Triplet ( $T_1$ ) optimized geometries.                              | S27    |
| <b>Table S7.</b> SOC of the molecules between $S_0$ - $T_1$ state for potential RTP molecules.                                                          | S28    |
| <b>Table S8.</b> $k_{ISC}$ and $k_{RISC}$ rate of all the investigated molecules at external reorganization energy ( $\lambda_{ext}$ ) value variation. | S28-31 |
| Optimized XYZ coordinates of all molecules in $S_0$ , $S_1$ and $T_1$ geometries.                                                                       | S32    |

## Computational Methodology

The ground state ( $S_0$ ) geometries optimizations of all compounds were performed by DFT using B3LYP<sup>1-2</sup> functional with the 6-31 G(d,p) basis set and D3ZERO (dispersion interaction) in ORCA 5.0.3 software<sup>3</sup>. The Tamm-Dancoff approximation (TDA) is applied on the optimized ground state ( $S_0$ ) geometry for TDA-DFT calculations to avoid the instability of the triplet state in TD-DFT.<sup>4</sup> All the optimized structures were characterized by frequency analysis, and all the frequencies were positive. The geometries of the lowest excited singlet ( $S_1$ ) and triplet ( $T_1$ ) states were optimized by Time dependent TD-DFT with B3LYP/6-31G(d,p) D3ZERO (dispersion interaction) level. All the dihedral angles were calculated using Mercury software. Natural transition orbitals (NTO) and all the charge transfer indices were calculated using a multi-wave functional analyzer program<sup>5</sup>.

The ionization potential (IP) and electron affinity (EA) for the molecules are calculated using the equations give below.

$$IP = E_{M^+} - E_M \quad (S1)$$

$$EA = E_M - E_{M^-} \quad (S2)$$

Where  $E_M$  represents the electronic energy of the molecule,  $E_{M^-}$  and  $E_{M^+}$  represent the energy of the anionic and cationic species by using the optimized geometry of the natural molecule.

To predict the emission properties of the designed TADF molecules, the radiative rates ( $k_r$ ) of the  $S_1$  states were evaluated using the Einstein spontaneous emission rate formula.<sup>6</sup>

$$k_r = \frac{f \Delta E^2}{1.499 \text{ cm}^{-2} \text{ s}} \quad (S3)$$

where  $f$  is the transition oscillator strength, and  $\Delta E$  is the vertical emission energy of the  $S_1$  state in the unit of wavenumbers ( $\text{cm}^{-1}$ ).

The  $k_{ISC}$  and  $k_{RISC}$  can be calculated in the framework of Fermi's golden-rule:<sup>7-9</sup>

$$k_{ISC}^{RISC} = \frac{2\pi}{\hbar} \left| \langle 1_{\Psi_I^0} | H_{SO} | 3_{\Psi_F^0} \rangle \right|^2_{FCWD} \quad (S4)$$

Where FCWD is the Franck-Condon weighted density of states.  $\langle 1_{\Psi_I^0} | H_{SO} | 3_{\Psi_F^0} \rangle$  is the SOC,  $\hbar$  is the reduced Dirac constant.<sup>10-12</sup>

$$FCWD = \frac{1}{\sqrt{4\pi\lambda RT}} \exp\left[-\frac{(\Delta E + \lambda)^2}{4\pi RT}\right] \quad (\text{S5})$$

Where  $\lambda$  is the total reorganization energy and  $\Delta E$  is the difference between the initial and final states and  $T$  is the temperature.

$\lambda$  is the total reorganization energy which is the sum of the inner and outer reorganization energy.  $\lambda = \lambda_{\text{ext}} + \lambda_{\text{in}}$

$$\lambda_{\text{in}}^{\text{ISC}} = E_S^T - E_T^T \quad (\text{S6})$$

$$\lambda_{\text{in}}^{\text{RISC}} = E_T^S - E_S^S \quad (\text{S7})$$

Where  $E_S^T$  is the energy of triplet state at singlet state geometry,  $E_T^T$  is energy of triplet state at triplet state geometry,  $E_T^S$  is energy of singlet state at triplet state geometry and  $E_S^S$  is the energy of singlet state at singlet state geometry.<sup>13-14</sup>

As the golden-rule expression states, ISC,  $\Delta E_{\text{ST}}$ , and SOC matrix elements are vital factors that determine  $k_{\text{ISC}}$  and  $k_{\text{RISC}}$ . SOC values were computed using the ORCA software.

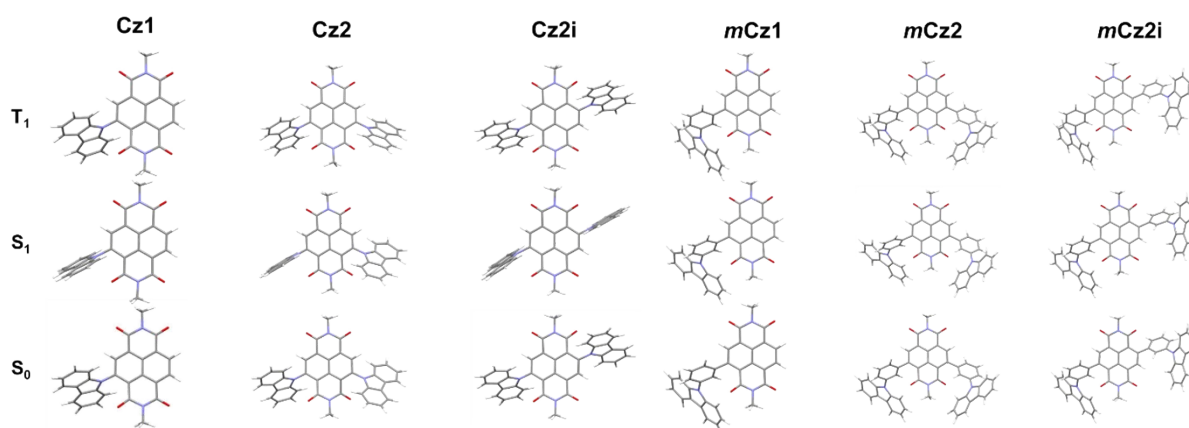

**Figure S1.**  $S_0$ ,  $S_1$  and  $T_1$  optimized geometries in the gaseous state of the investigated molecules.

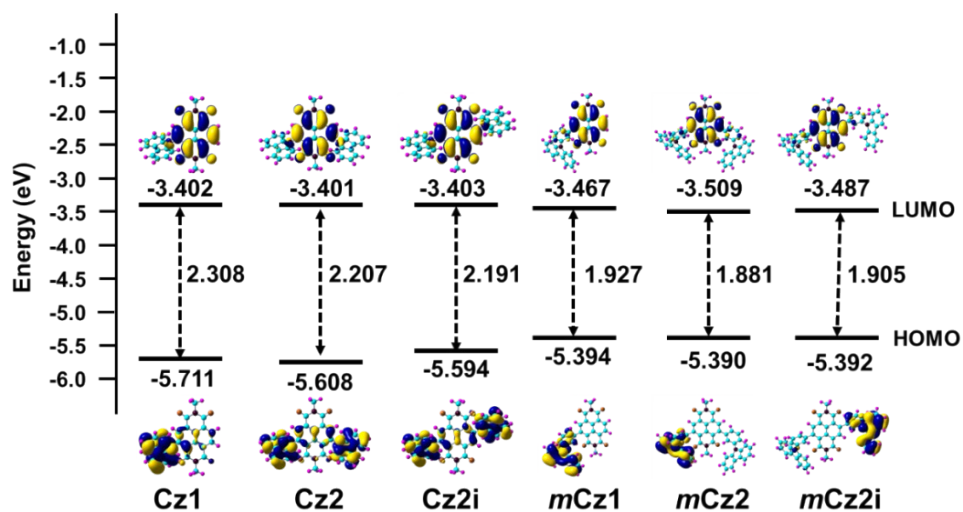

**Figure S2.** Frontier orbital distribution at the optimized  $S_0$  geometries for the investigated molecules.

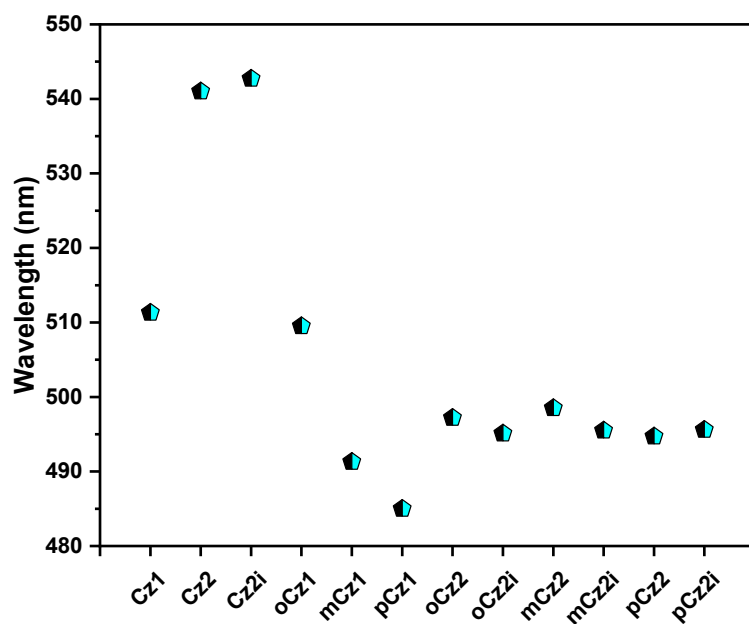

**Figure S3.** Calculated absorption of the proposed molecules using benchmark functional **SOGGA11X/6-31+g(d)**.

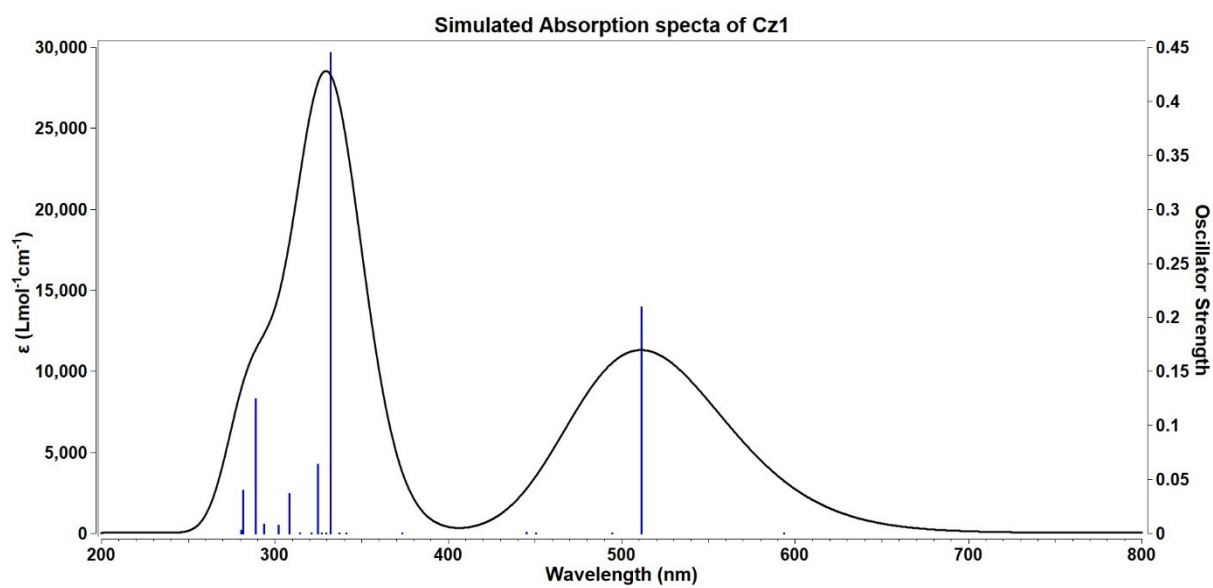

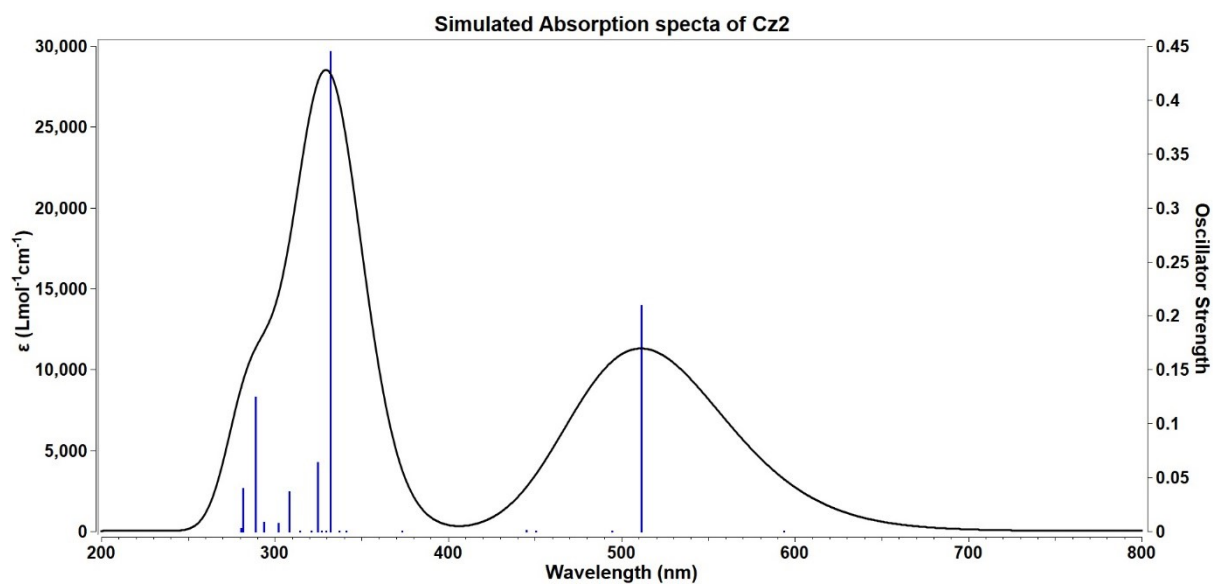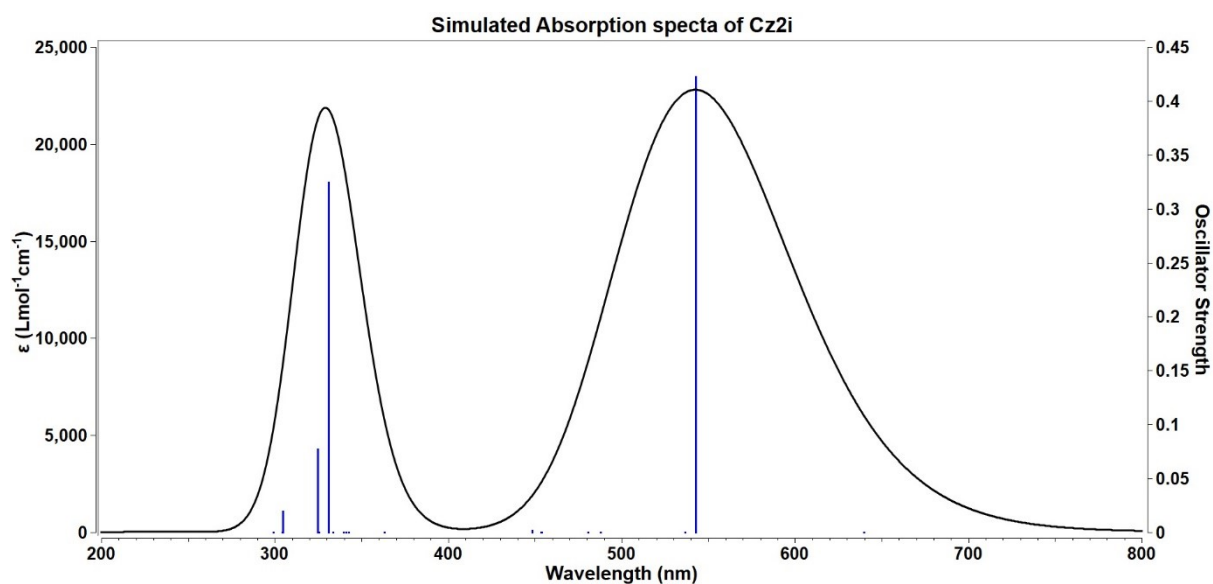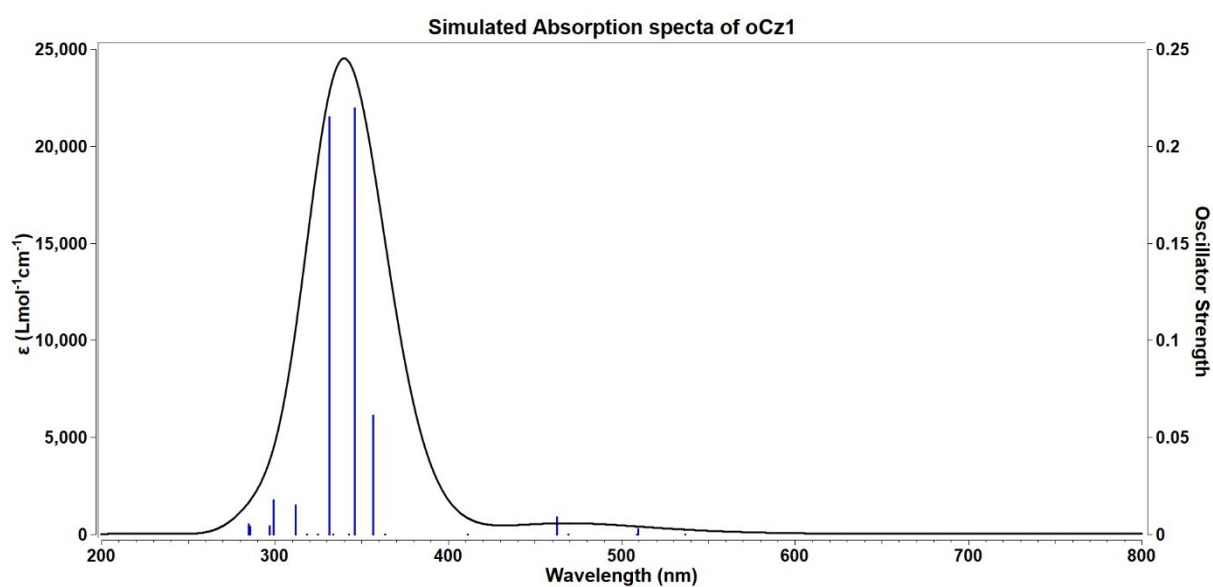

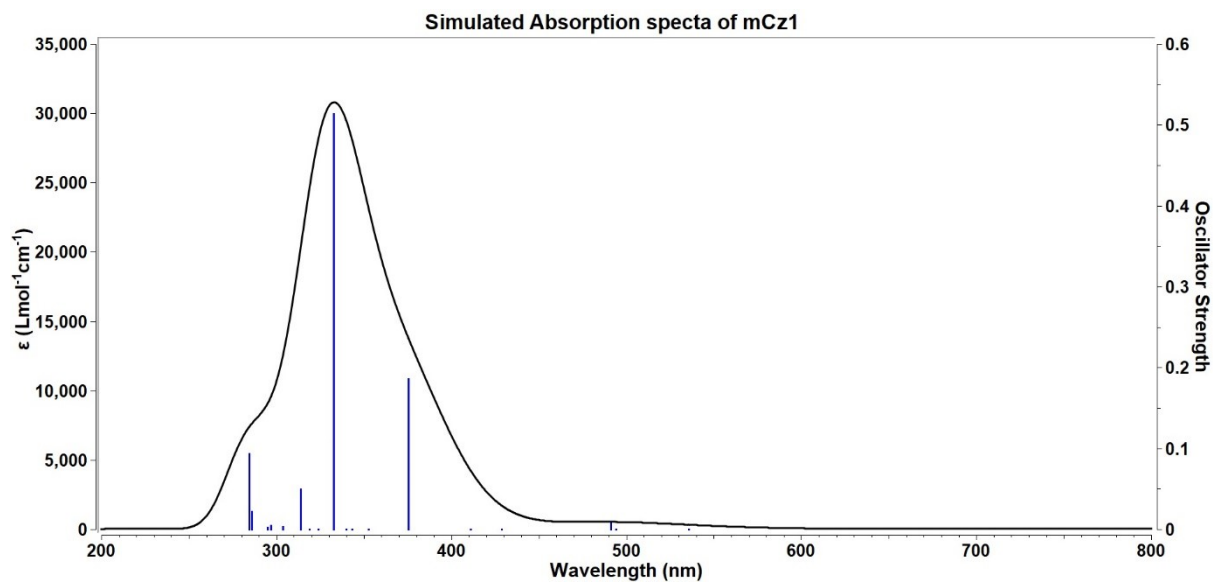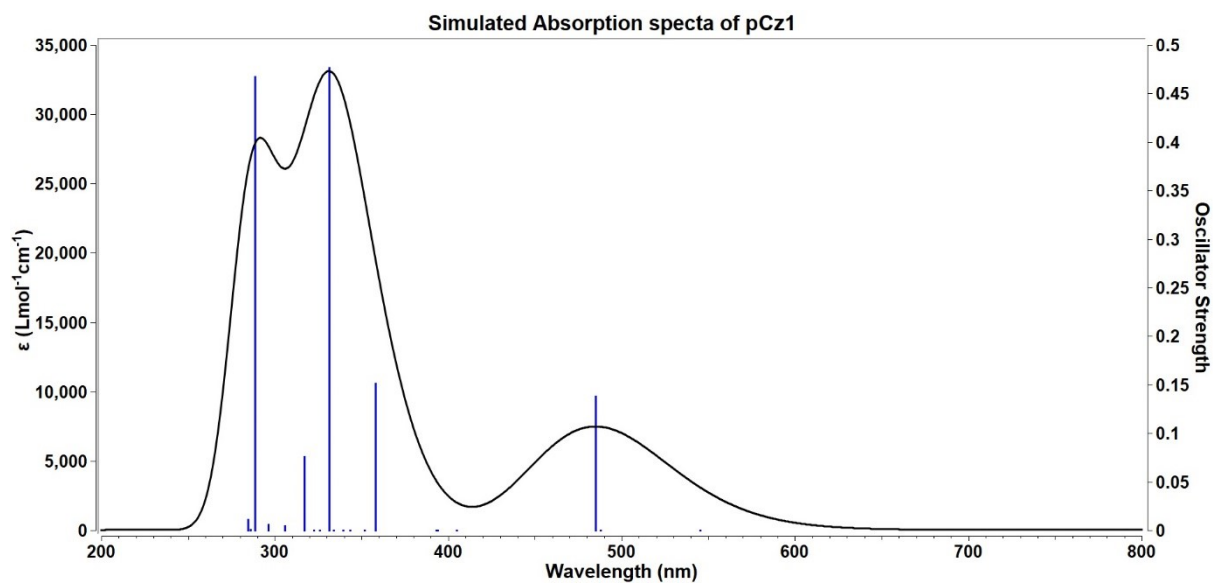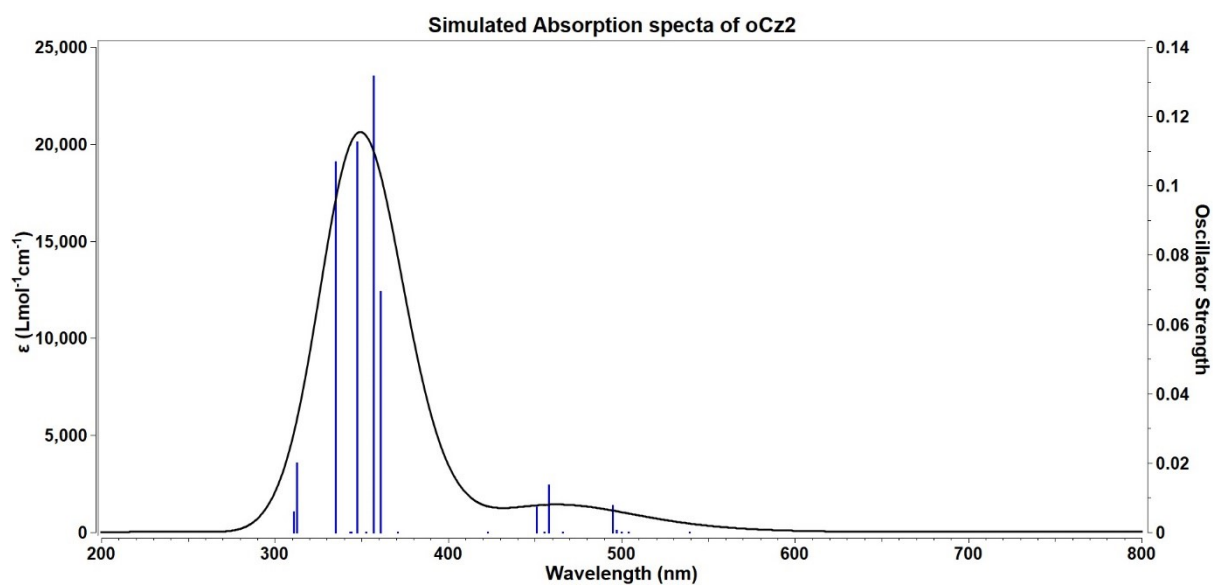



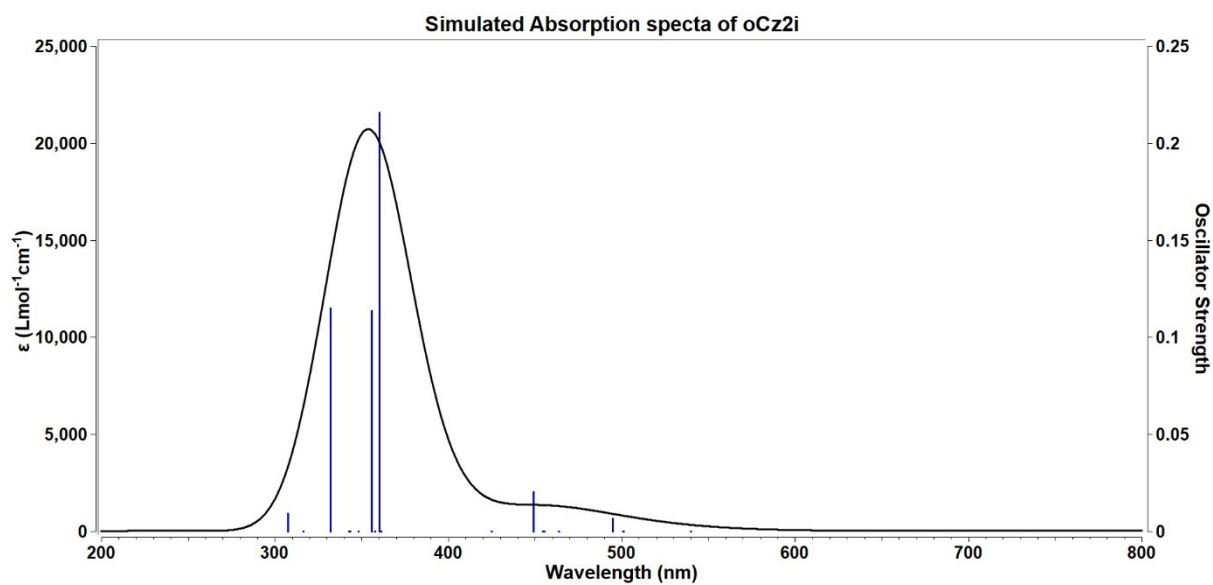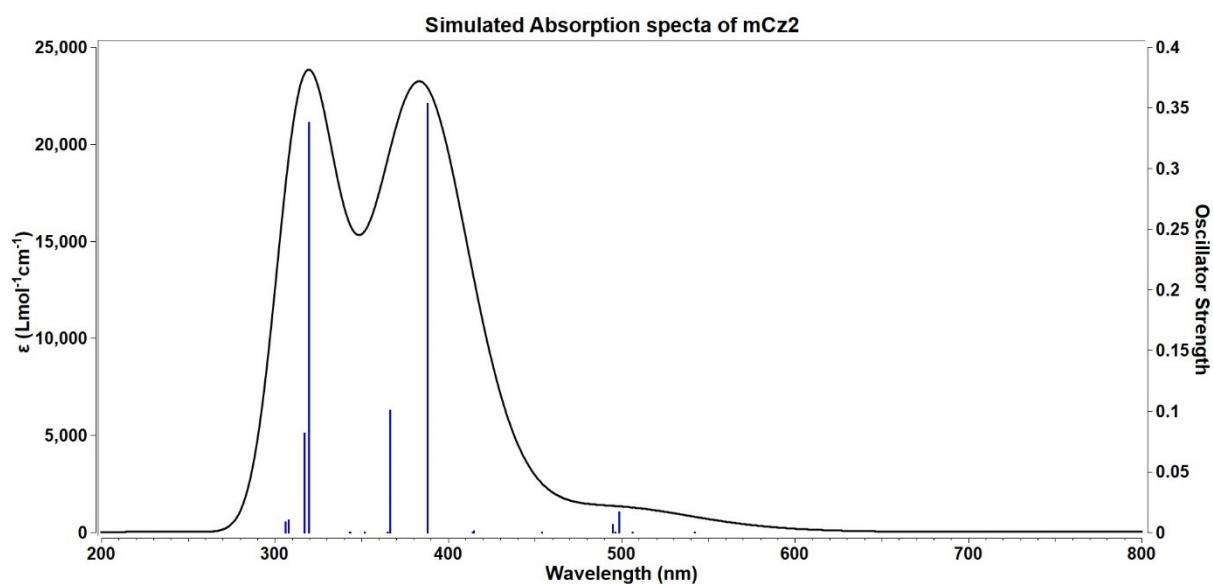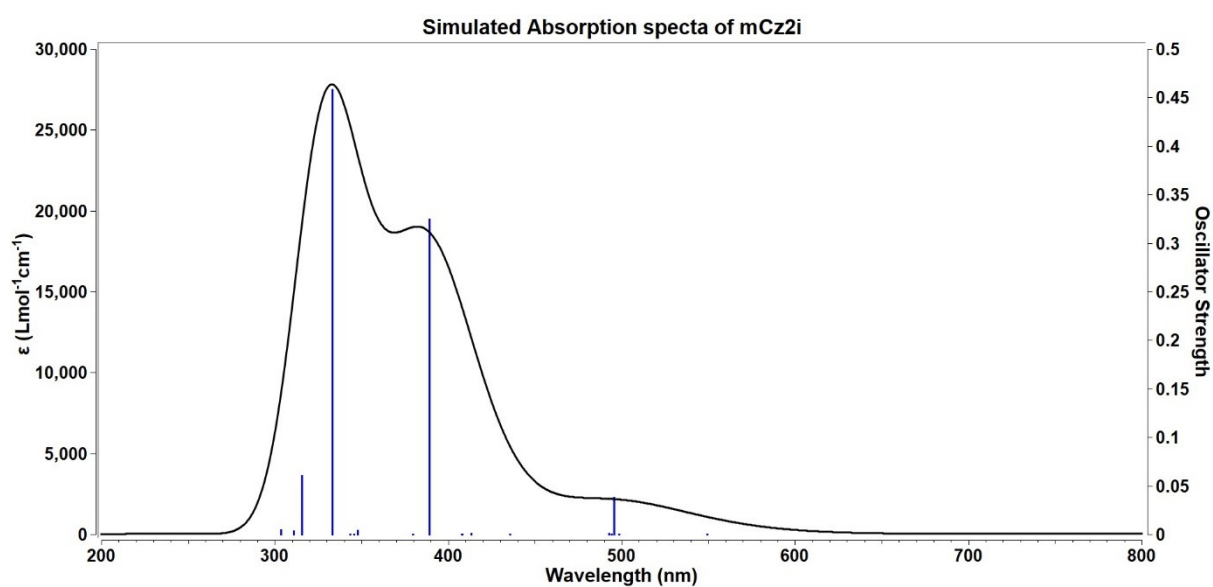

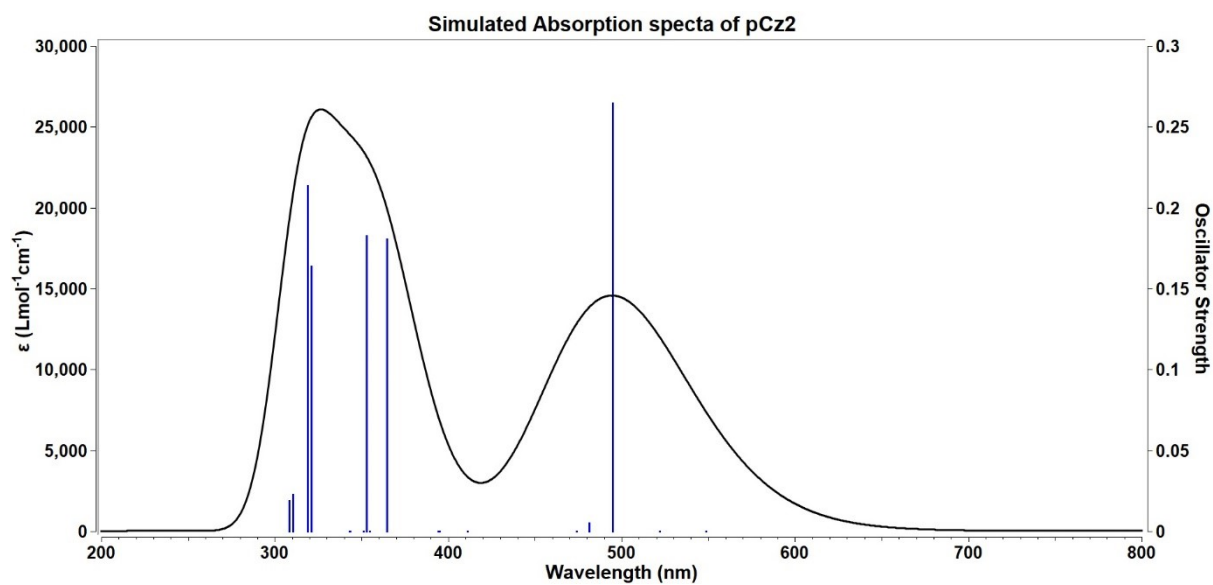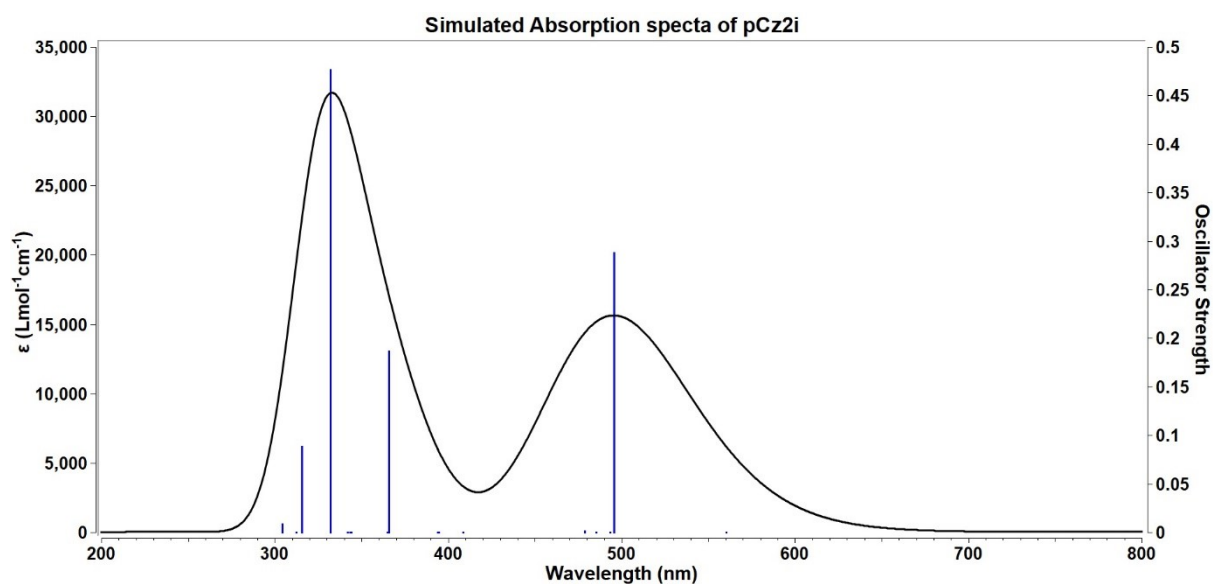

**Figure S4.** Theoretical absorption spectra are generated using the Molden program with FWHM of 0.25 eV for all twelve molecules.

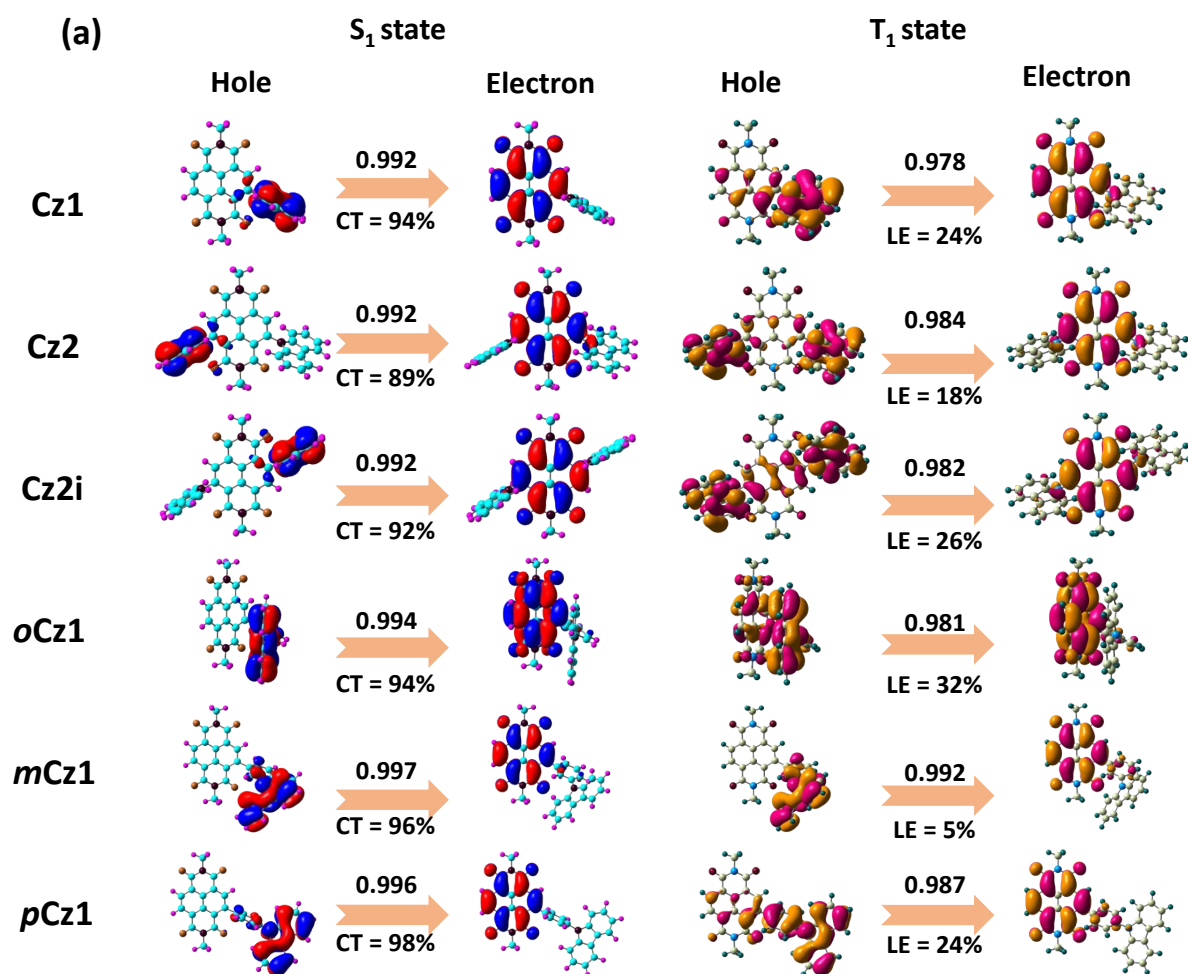

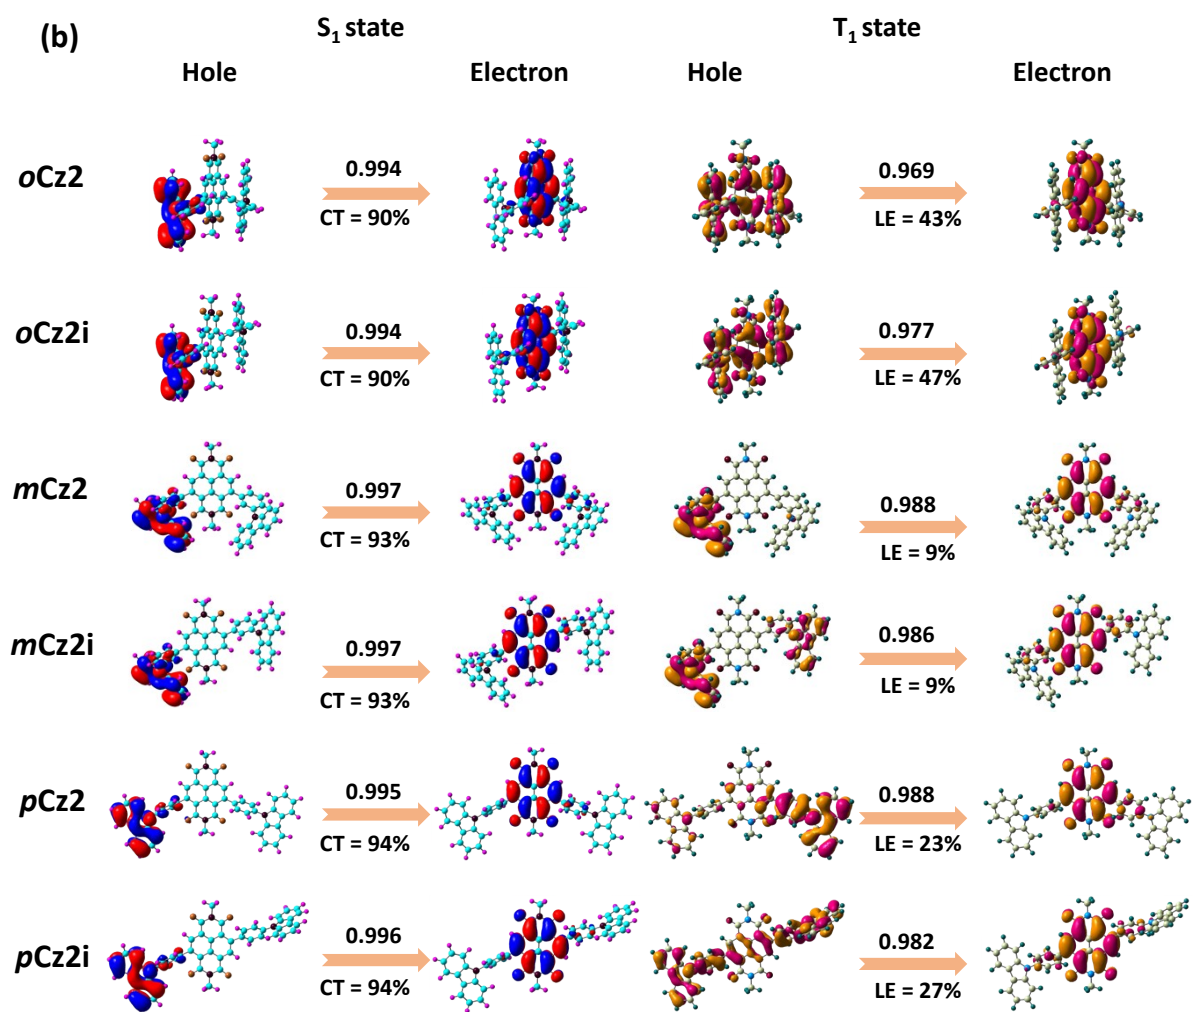

Figure S5 (a-b). Natural transition orbitals (NTOs) of the S<sub>1</sub> and T<sub>1</sub> states for the investigated molecules at S<sub>1</sub> and T<sub>1</sub> geometry, respectively.

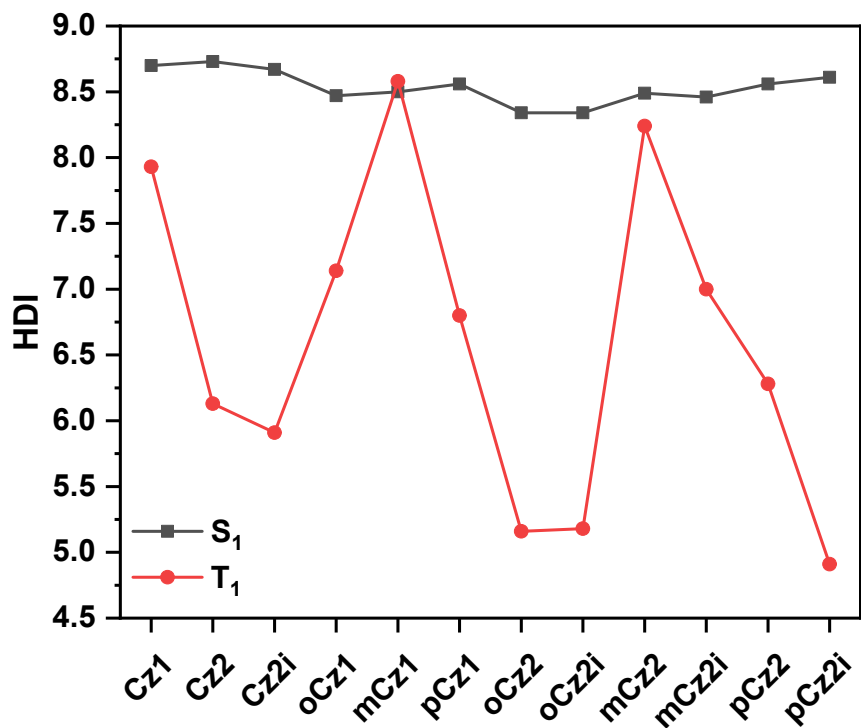

Figure S6 (a). HDI at S<sub>1</sub> and T<sub>1</sub> state at S<sub>1</sub> and T<sub>1</sub> geometry of the proposed molecules

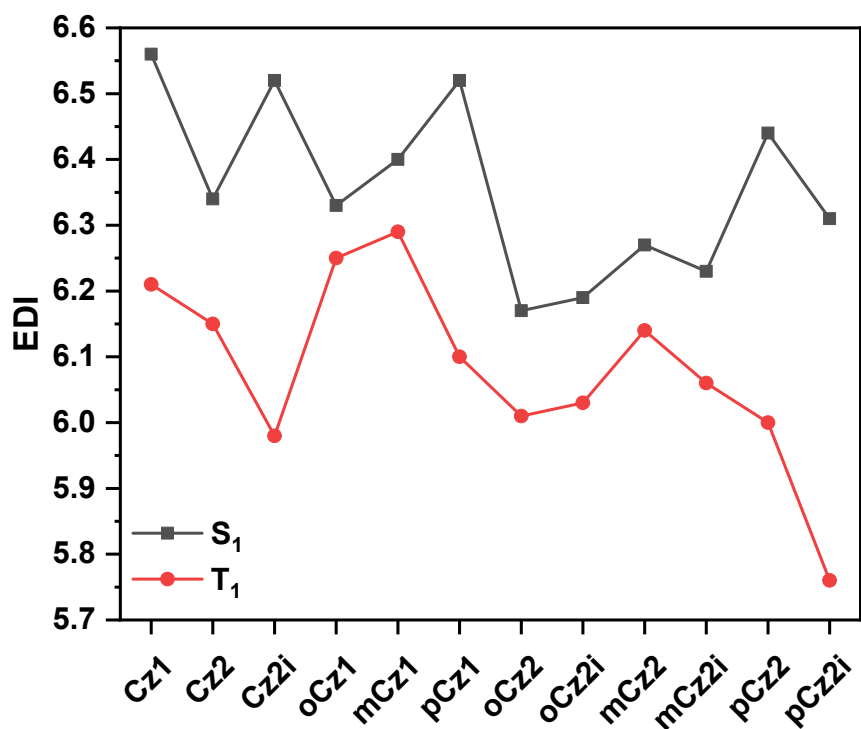

Figure S6 (b). EDI at S<sub>1</sub> and T<sub>1</sub> state at S<sub>1</sub> and T<sub>1</sub> geometry of the proposed molecules

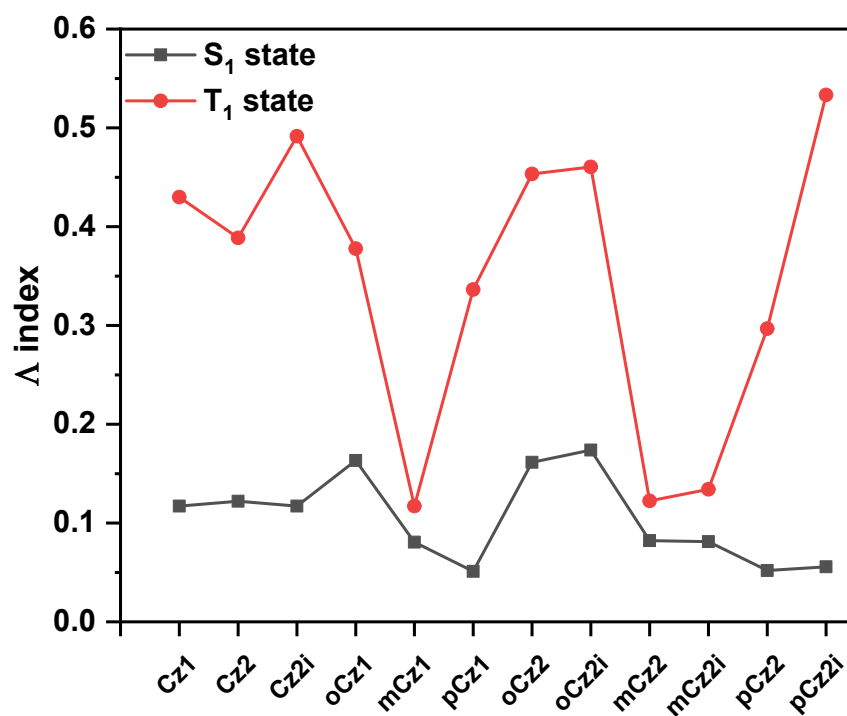

Figure S7.  $\Delta$  index at  $S_1$  and  $T_1$  geometry of the proposed molecules

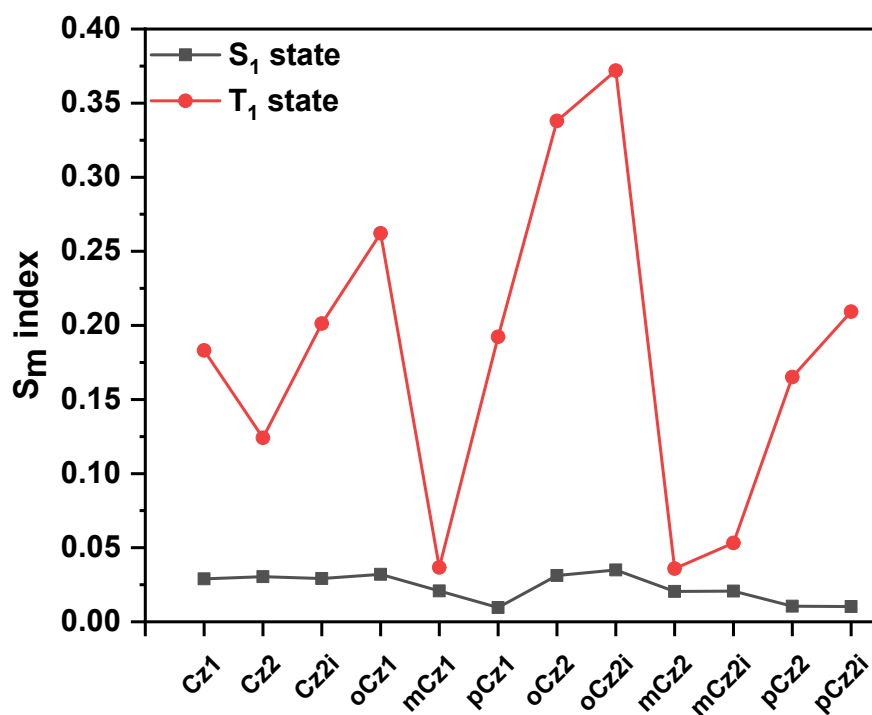

Figure S8.  $S_m$  index at  $S_1$  and  $T_1$  geometry of the proposed molecules

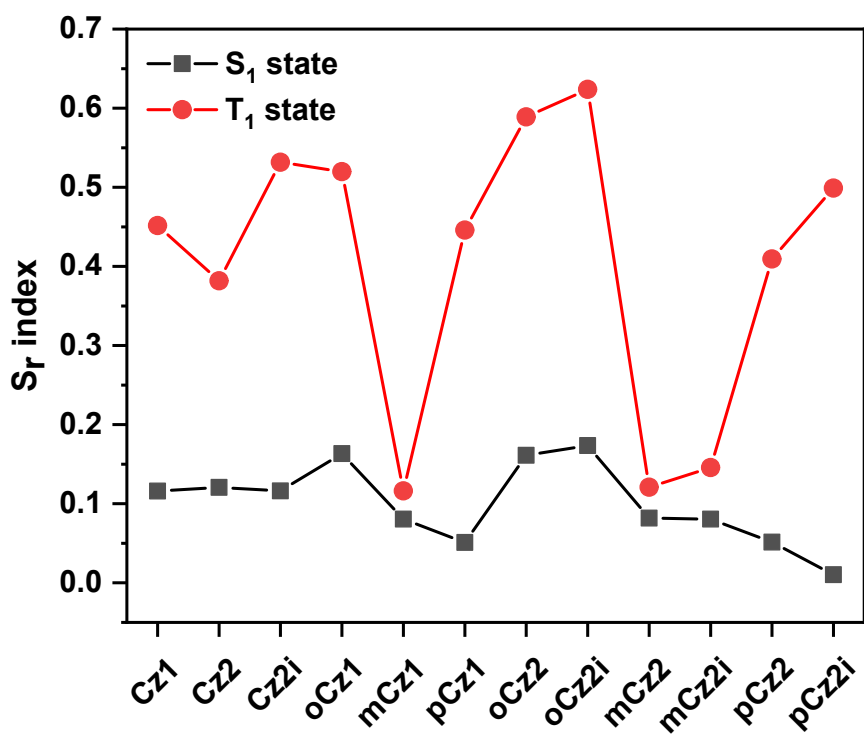

Figure S9.  $S_r$  index at  $S_1$  and  $T_1$  geometry of the proposed molecules

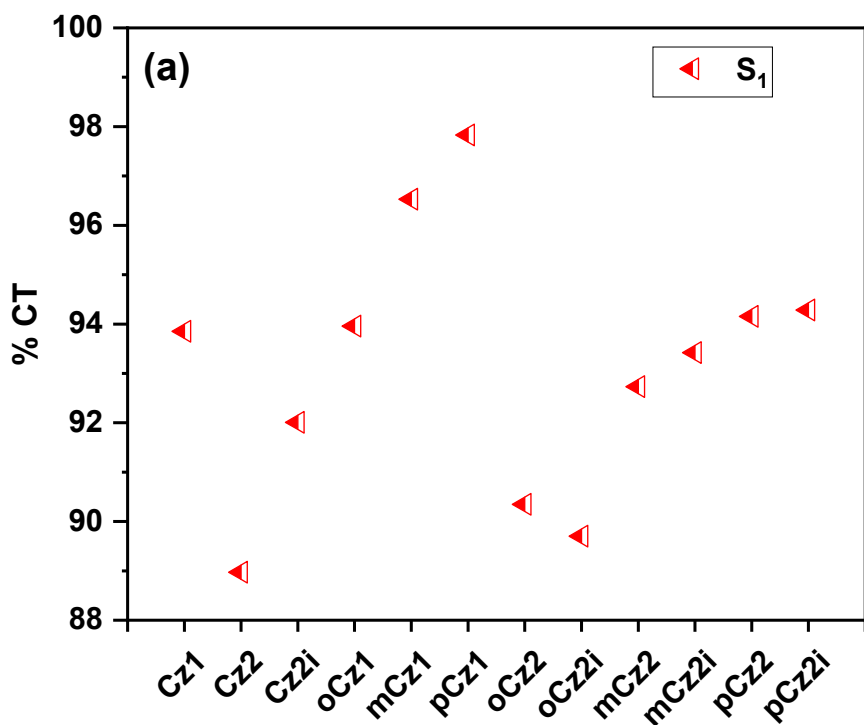

Figure S10 (a). % CT at  $S_1$  geometry of the proposed molecules

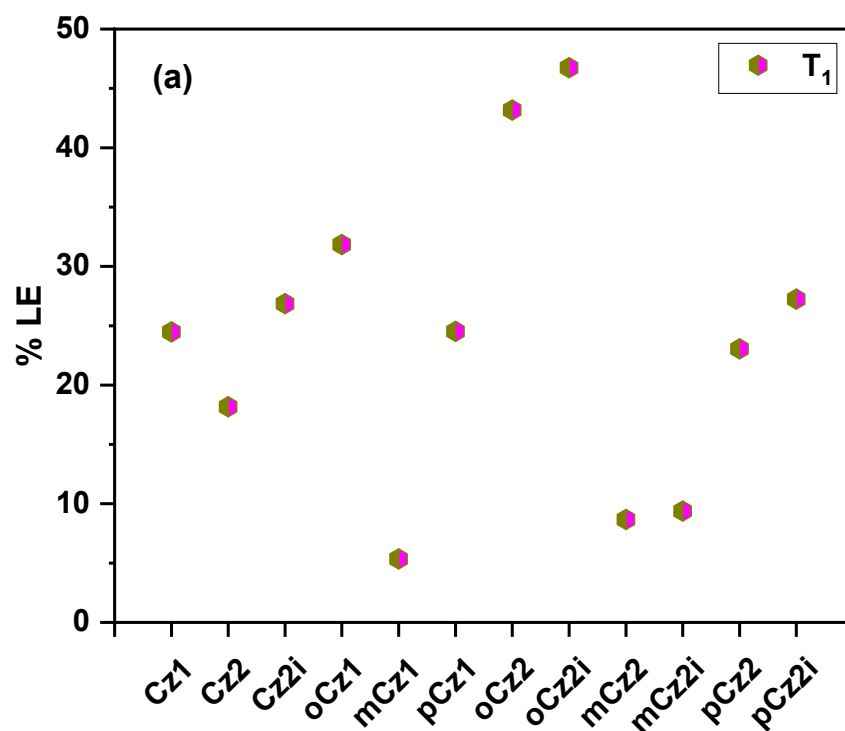

Figure S10 (b). % LE at T<sub>1</sub> geometry of the proposed molecules

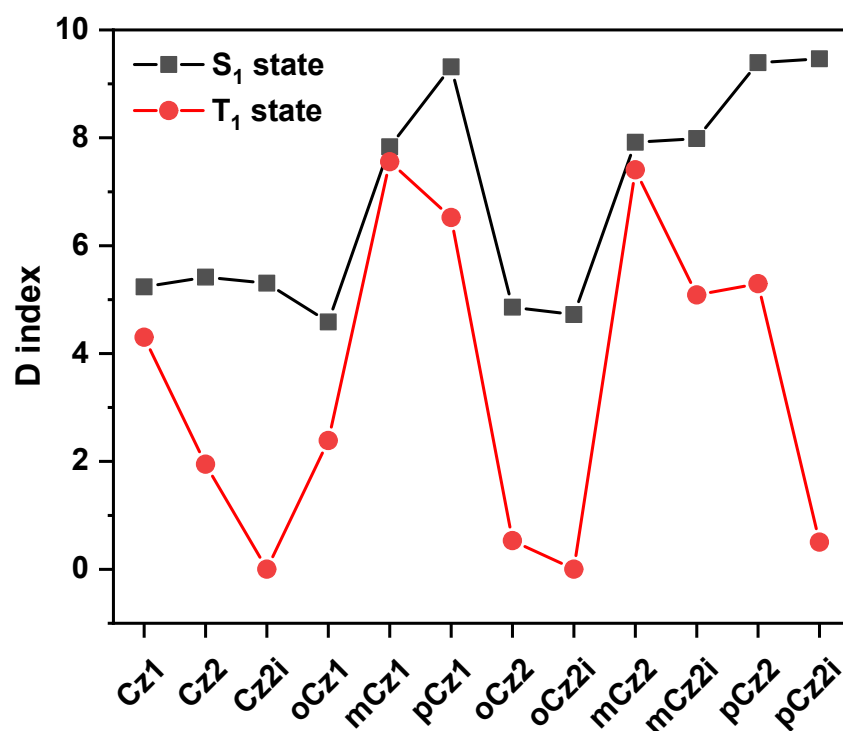

Figure S11. D index at S<sub>1</sub> and T<sub>1</sub> geometry of the proposed molecules



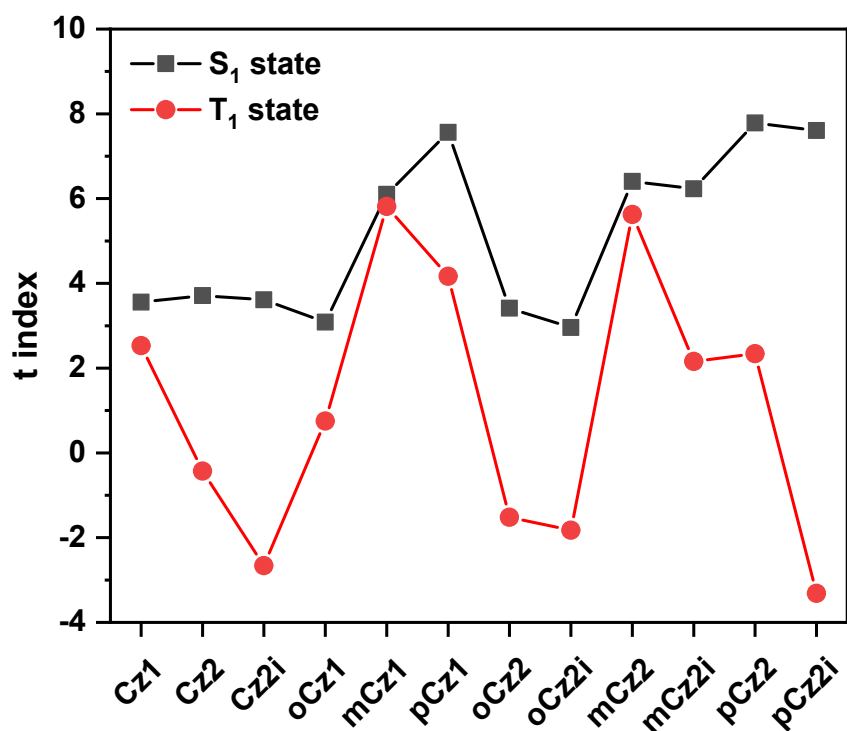

Figure S12. t index at S<sub>1</sub> and T<sub>1</sub> geometry of the proposed molecules

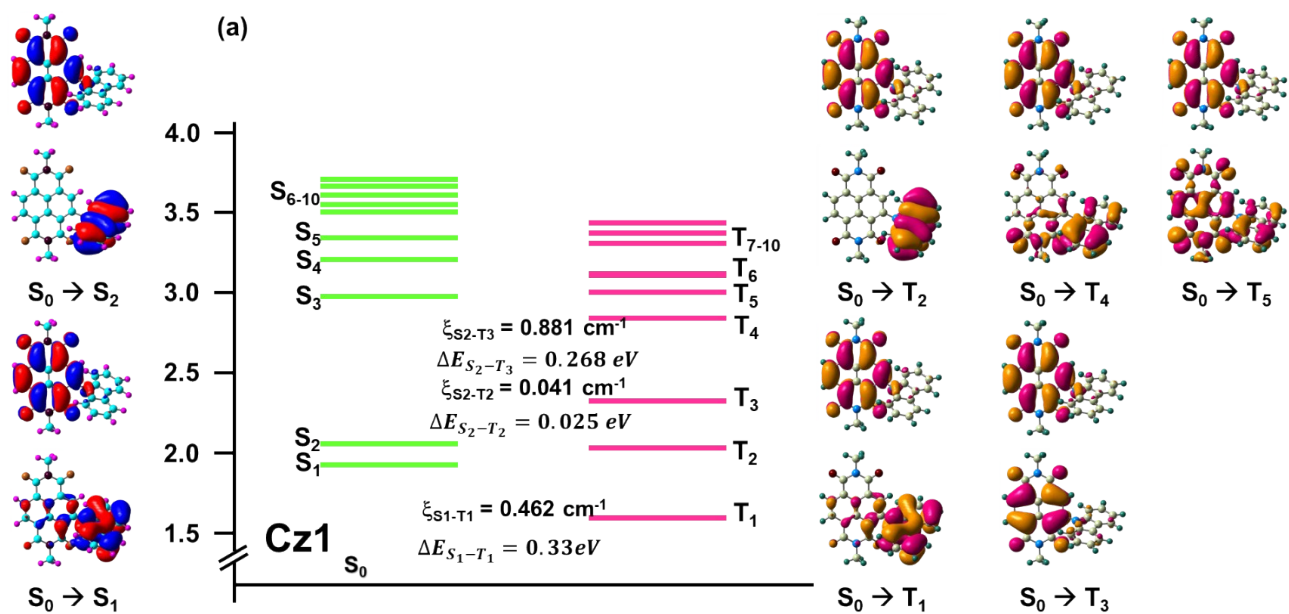

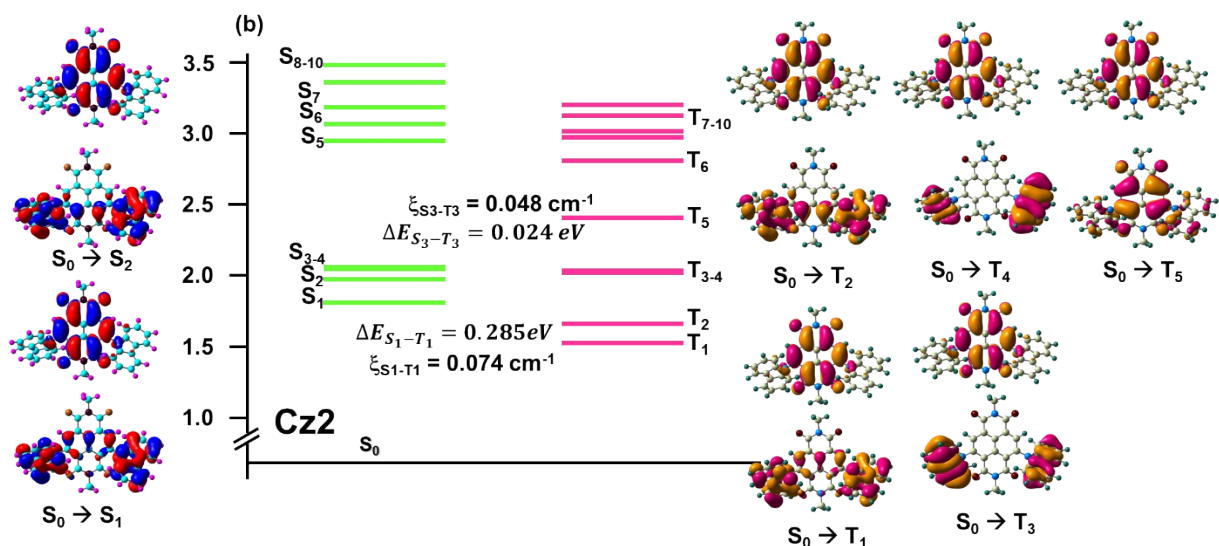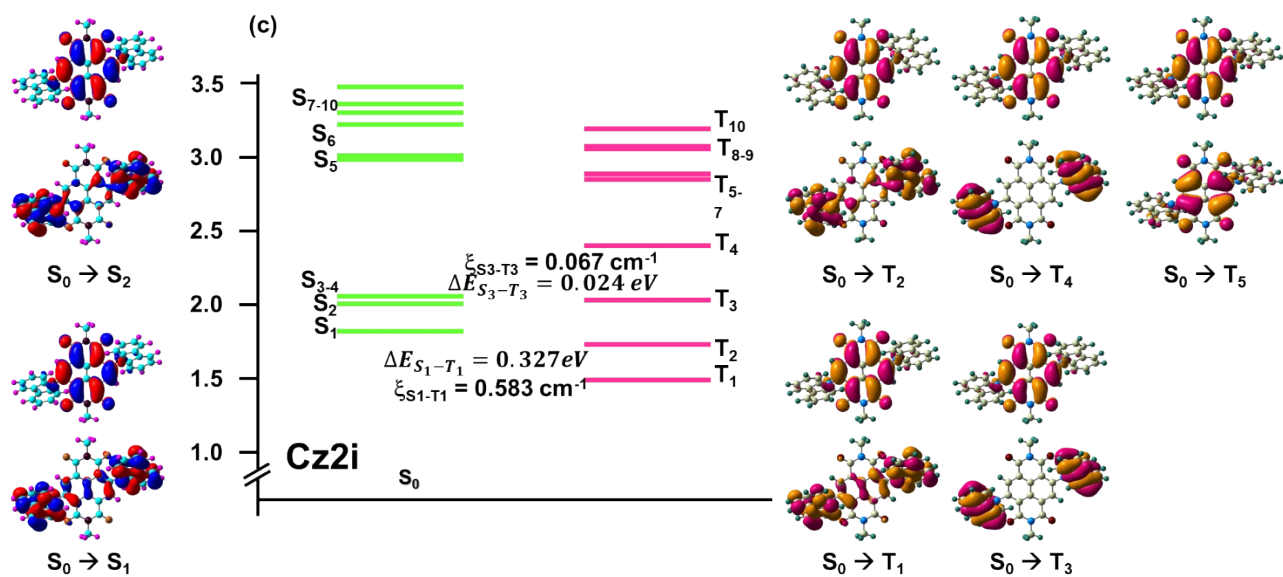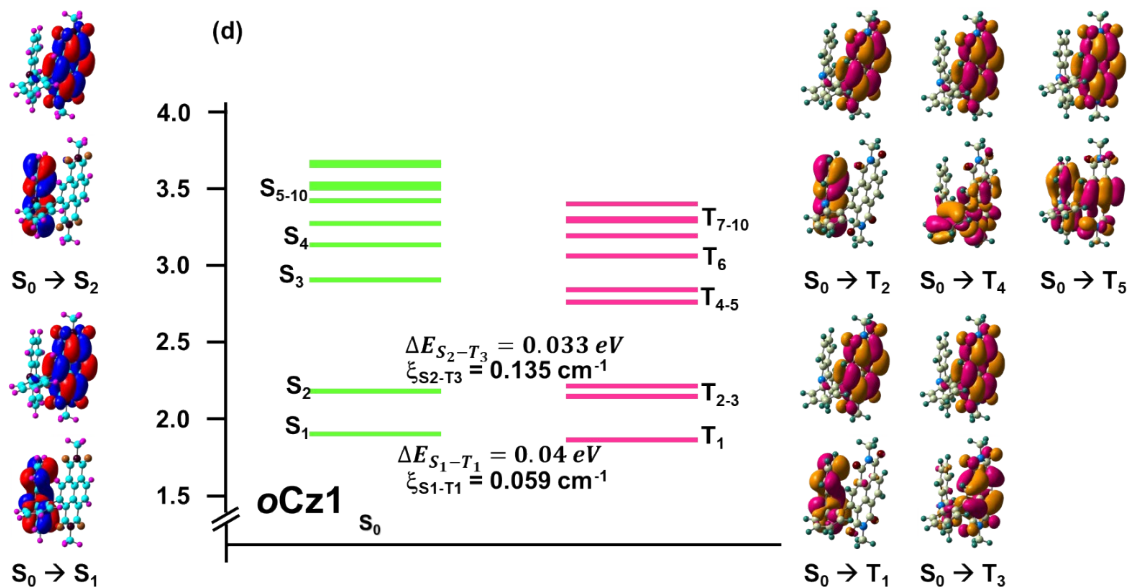

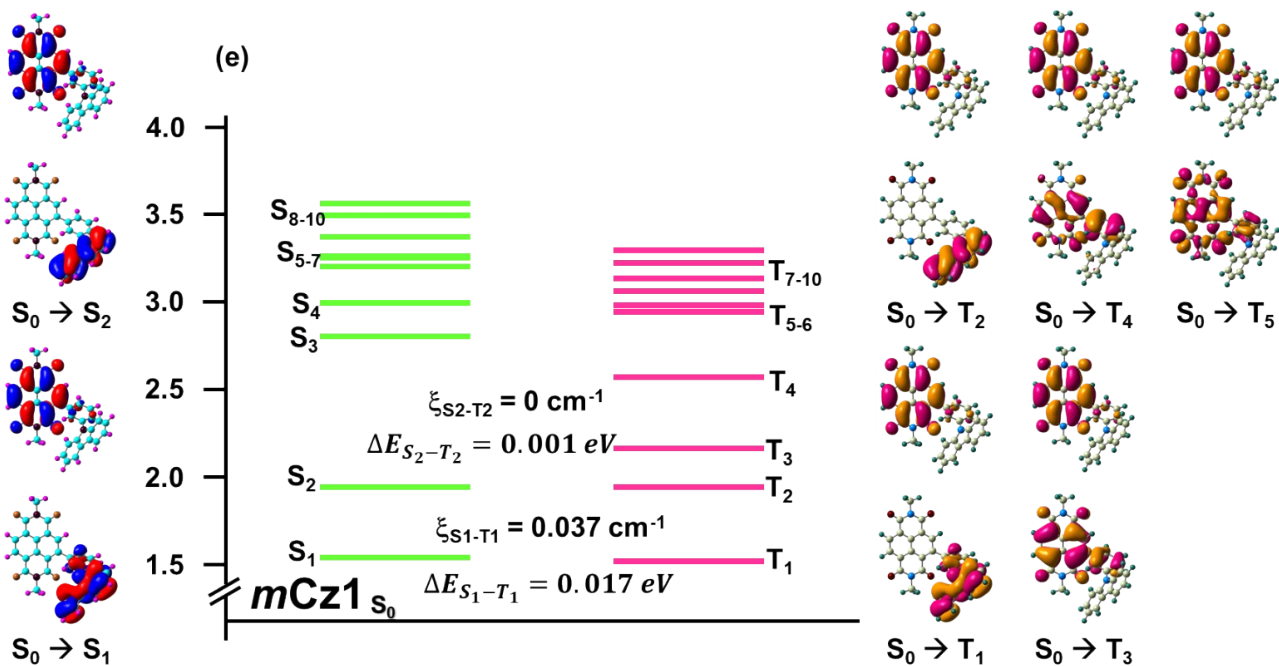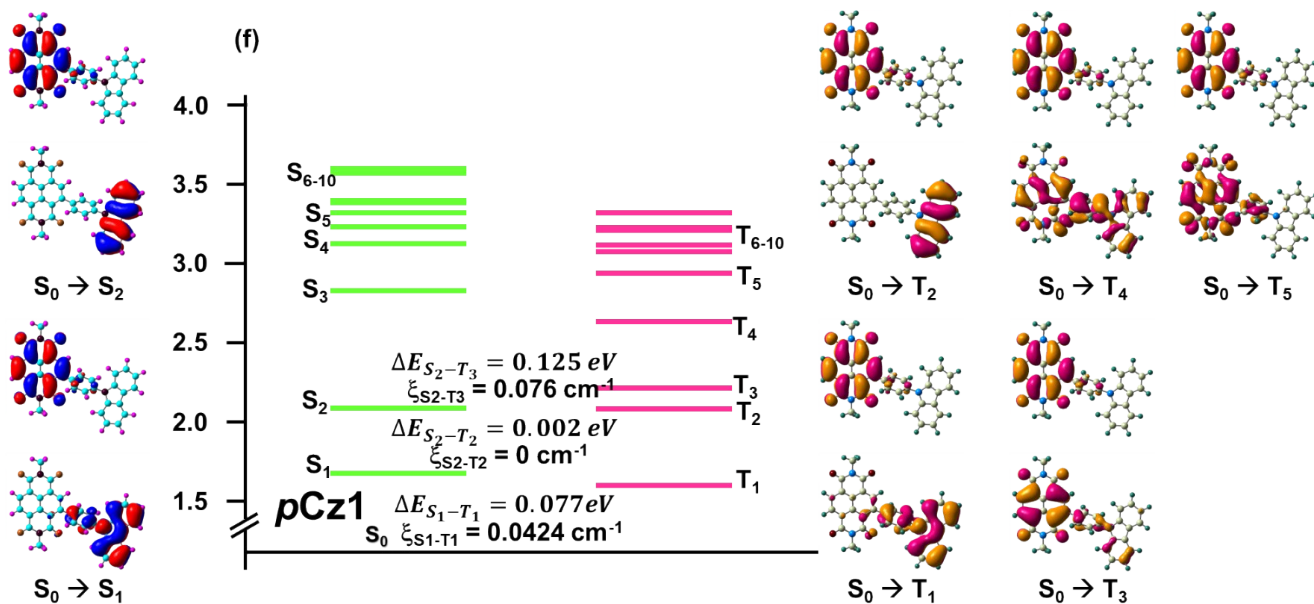

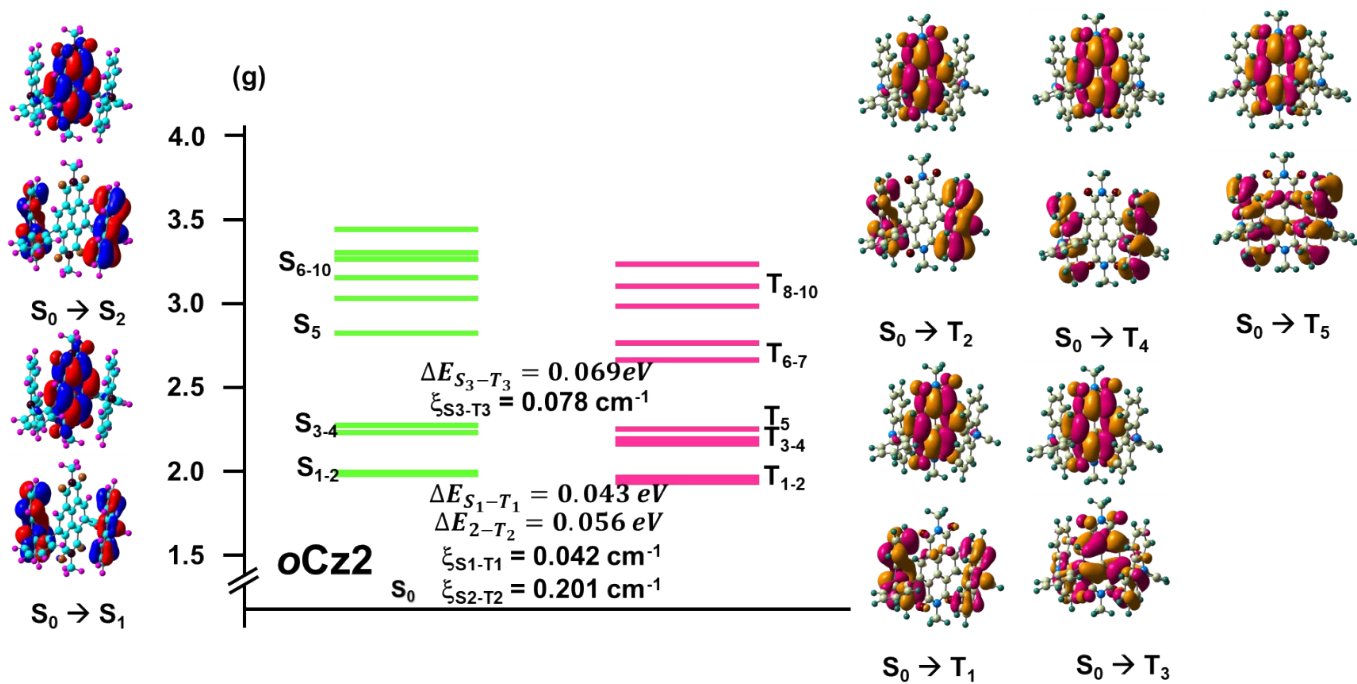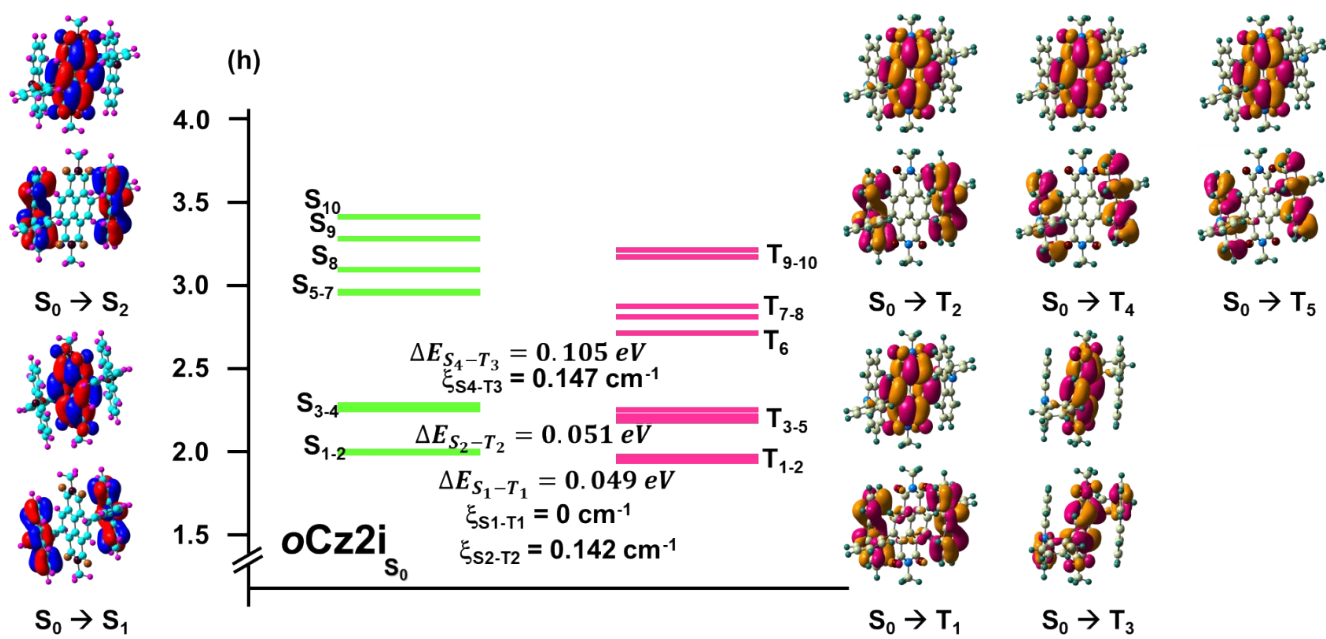

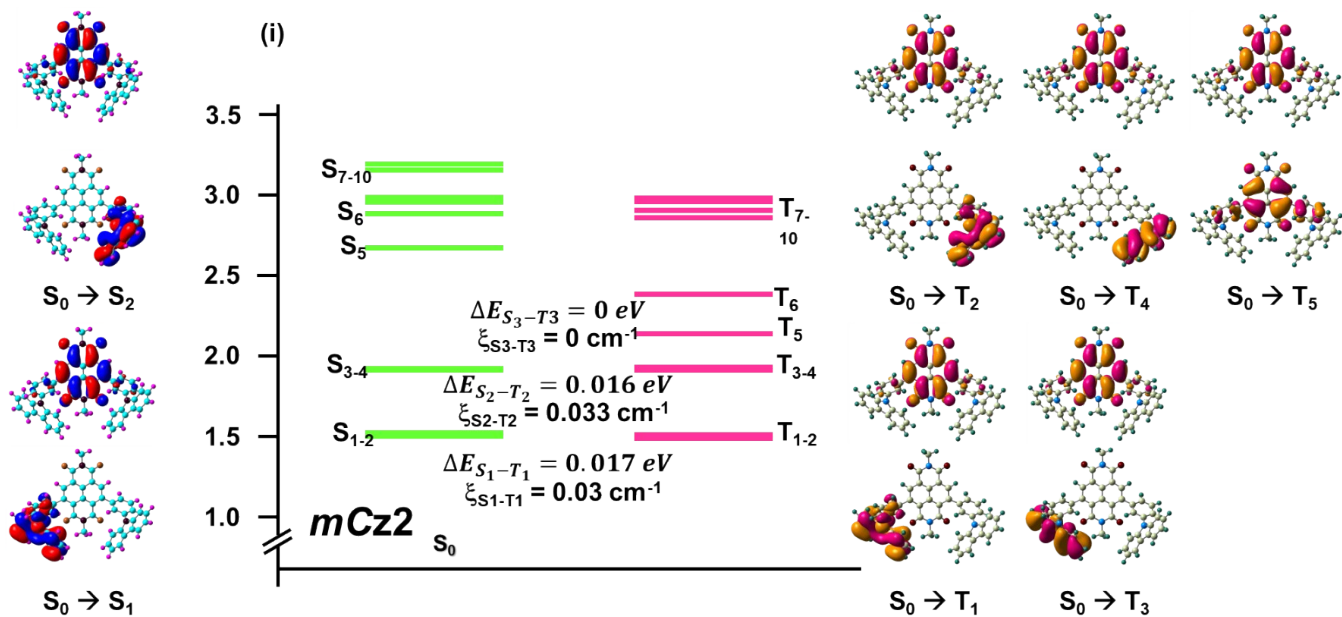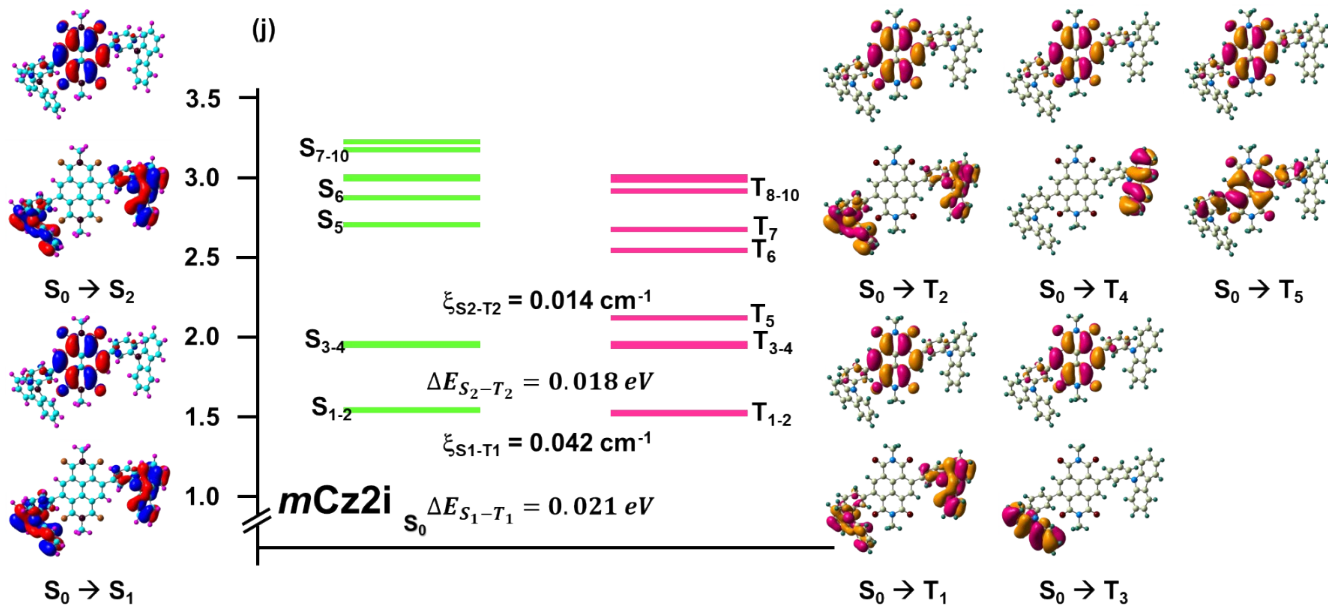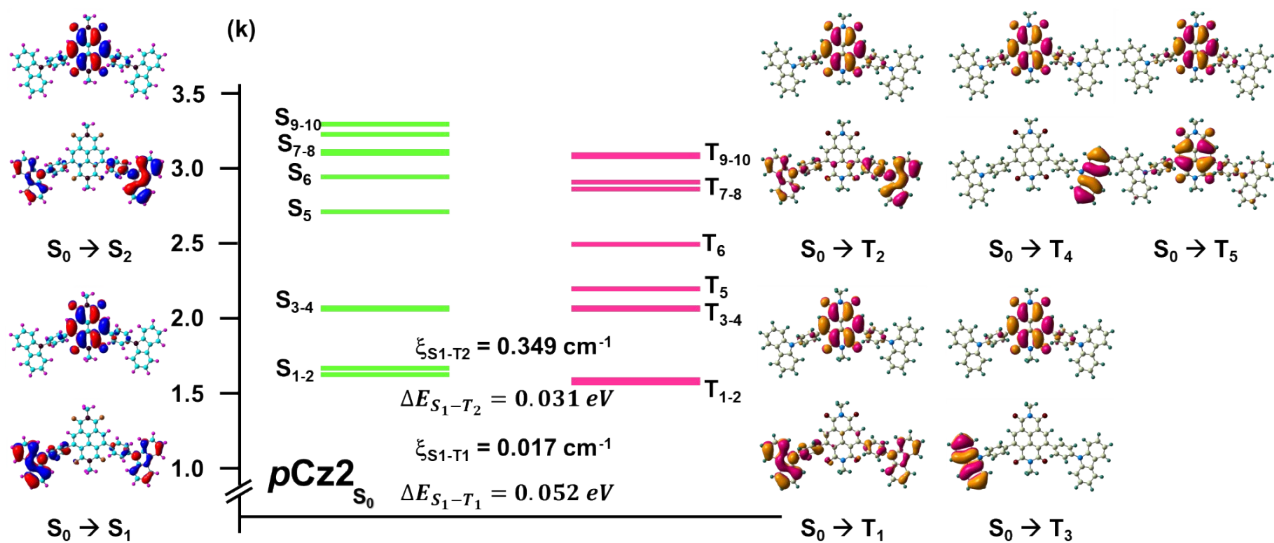



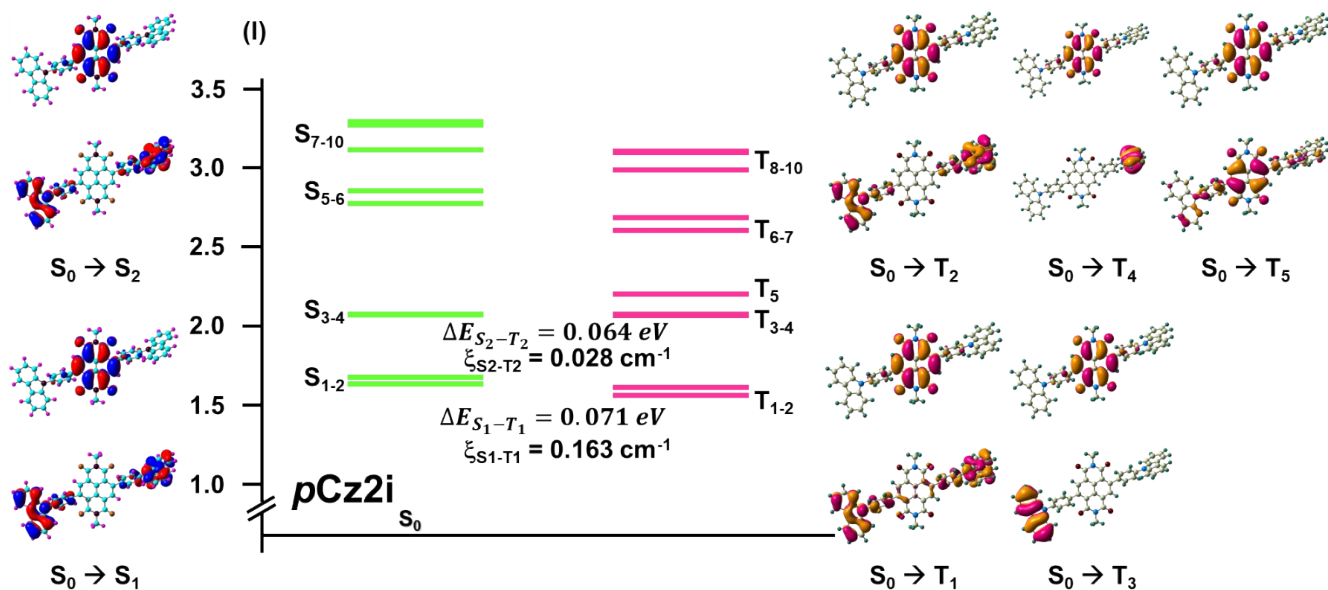

Figure S13 (a-l). Qualitative analysis of the possibilities of ISC and RISC rates.

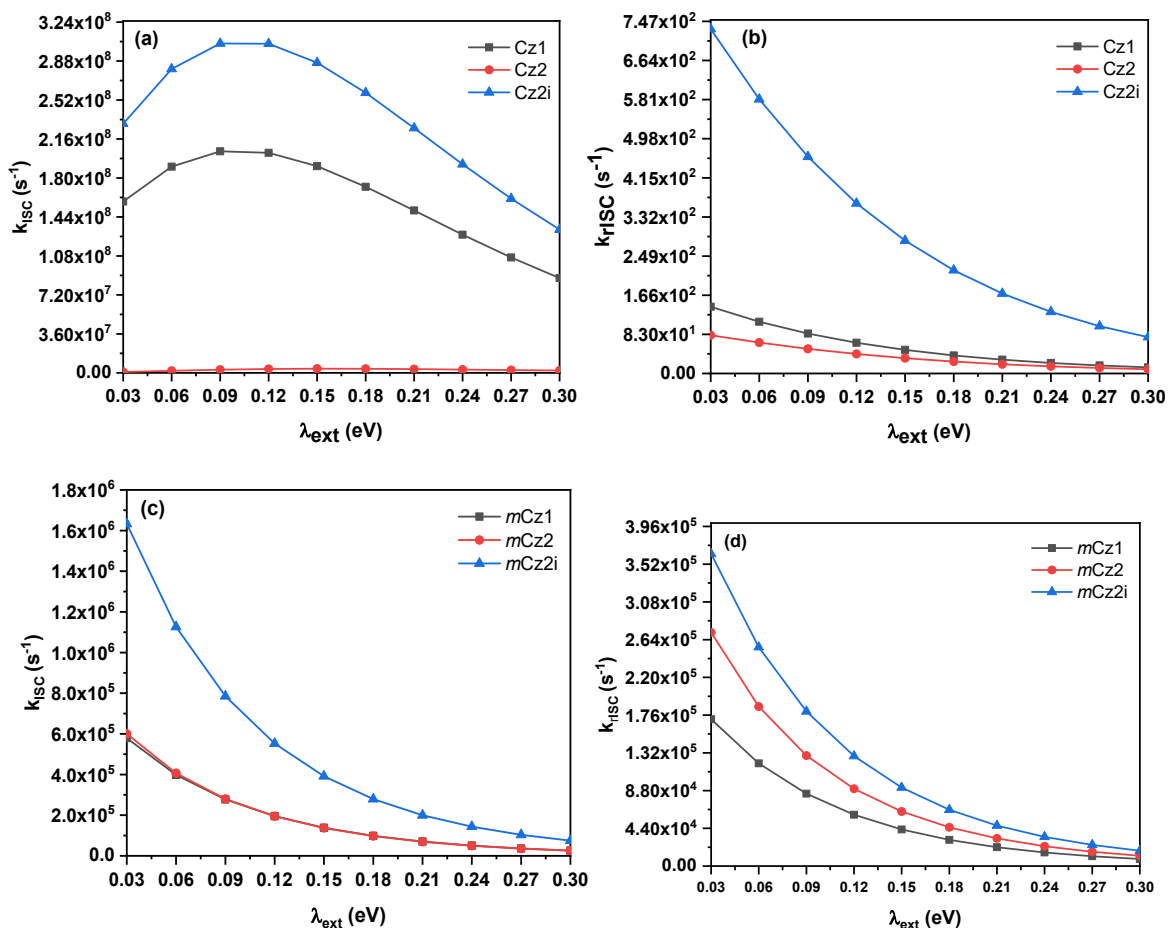

Figure S14 (a-d). ISC and RISC rates of the investigated molecules vs external reorganization energy range.

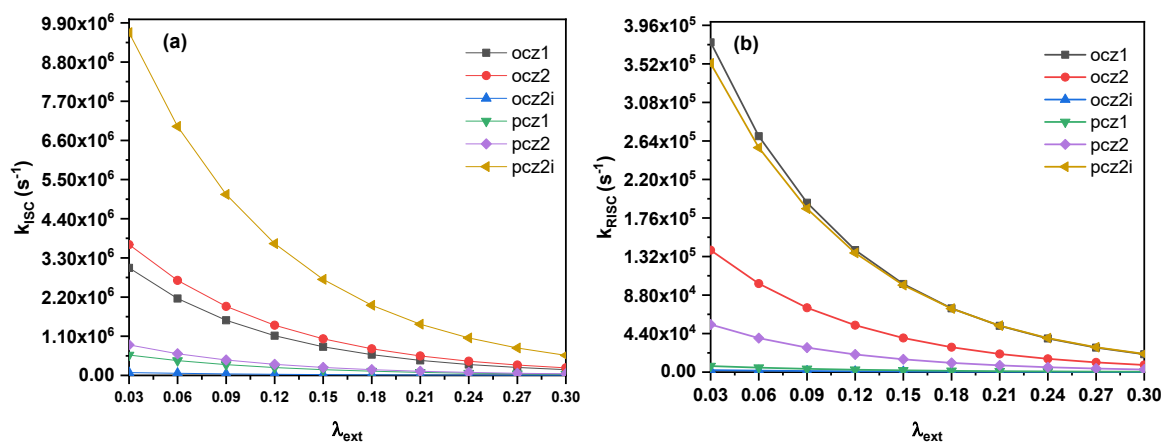

**Figure S15 (a, b).** The rate for the RISC process in the studied emitters as a function of the external reorganization energy.

**Table S1.** Bond length and dihedral angle of TADF emitters at  $S_0$ ,  $S_1$ , and  $T_1$  optimized geometries.

| Molecules/Dihedral angle/length | $S_0$       |                 | $S_1$       |                 | $T_1$       |                 |
|---------------------------------|-------------|-----------------|-------------|-----------------|-------------|-----------------|
|                                 | $l_1/l_2$   | $\alpha/\beta$  | $l_1/l_2$   | $\alpha/\beta$  | $l_1/l_2$   | $\alpha/\beta$  |
| <b>Cz1</b>                      | 1.404       | 56.94           | 1.451       | 89.90           | 1.406       | 57.13           |
| <b>Cz2</b>                      | 1.404       | 54.94/54.13     | 1.451/1.416 | 89.39/62.50     | 1.421/1.422 | 63.40/65.15     |
| <b>Cz2i</b>                     | 1.404       | 56.92/56.89     | 1.450/1.422 | 89.95/85.97     | 1.410       | 58.23/58.22     |
| Molecules/Dihedral angle/length | $l_3/l_4$   | $\gamma/\delta$ | $l_3/l_4$   | $\gamma/\delta$ | $l_3/l_4$   | $\gamma/\delta$ |
| <b><i>o</i>Cz1</b>              | 1.495/1.436 | 80.52/79.25     | 1.492/1.436 | 60.84/61.31     | 1.485/1.435 | 68.99/67.19     |
| <b><i>m</i>Cz1</b>              | 1.487/1.416 | 54.82/49.05     | 1.495/1.438 | 58.80/56.55     | 1.477/1.417 | 46.53/53.79     |
| <b><i>p</i>Cz1</b>              | 1.487/1.414 | 54.81/52.53     | 1.496/1.438 | 80.07/63.41     | 1.463/1.404 | 44.59/46.85     |

**Table S2.** Bond length and dihedral angle of TADF emitters at  $S_0$ ,  $S_1$ , and  $T_1$  optimized geometries.

| Molecules/Dihedral angle/length | $S_0$       |             |                 |                   | $S_1$       |             |                 |                   | $T_1$       |             |                 |                   |
|---------------------------------|-------------|-------------|-----------------|-------------------|-------------|-------------|-----------------|-------------------|-------------|-------------|-----------------|-------------------|
|                                 | $l_3/l_4$   | $l_5/l_6$   | $\gamma/\delta$ | $\gamma'/\delta'$ | $l_3/l_4$   | $l_5/l_6$   | $\gamma/\delta$ | $\gamma'/\delta'$ | $l_3/l_4$   | $l_5/l_6$   | $\gamma/\delta$ | $\gamma'/\delta'$ |
| <b><i>o</i>Cz2</b>              | 1.495/1.436 | 1.495/1.437 | 83.77/80.67     | 83.05/80.71       | 1.494/1.449 | 1.493/1.436 | 81.51/78.31     | 80.20/77.52       | 1.488/1.433 | 1.488/1.434 | 73.40/68.79     | 72.22/69.12       |
| <b><i>o</i>Cz2i</b>             | 1.495/1.437 | 1.495/1.437 | 81.87/80.15     | 81.87/80.15       | 1.490/1.436 | 1.493/1.435 | 61.11/61.73     | 77.66/76.31       | 1.486/1.433 | 1.486/1.433 | 69.34/68.30     | 69.35/68.31       |
| <b><i>m</i>Cz2</b>              | 1.487/1.416 | 1.487/1.416 | 50.86/52.13     | 48.04/55.50       | 1.495/1.437 | 1.489/1.422 | 58.65/55.87     | 50.38/55.64       | 1.481/1.418 | 1.488/1.421 | 48.78/51.82     | 48.70/53.74       |



|                     |             |             |             |             |             |             |             |             |             |             |             |             |
|---------------------|-------------|-------------|-------------|-------------|-------------|-------------|-------------|-------------|-------------|-------------|-------------|-------------|
| <b><i>mCz2i</i></b> | 1.487/1.417 | 1.490/1.416 | 47.14/54.97 | 54.87/53.04 | 1.494/1.438 | 1.491/1.422 | 57.53/56.52 | 55.35/54.31 | 1.479/1.418 | 1.478/1.414 | 46.01/53.82 | 47.43/50.34 |
| <b><i>pCz2</i></b>  | 1.488/1.415 | 1.486/1.414 | 57.85/51.49 | 52.69/52.60 | 1.496/1.434 | 1.491/1.423 | 82.91/60.53 | 56.86/56.77 | 1.490/1.418 | 1.463/1.404 | 61.14/53.00 | 43.15/47.45 |
| <b><i>pCz2i</i></b> | 1.487/1.414 | 1.488/1.415 | 57.35/51.50 | 57.93/53.24 | 1.495/1.437 | 1.491/1.423 | 79.83/62.55 | 56.19/56.44 | 1.470/1.409 | 1.473/1.411 | 45.47/49.14 | 48.26/50.23 |

**Table S3.** S<sub>1</sub> and T<sub>1</sub> states calculated by the TDA-DFT approach at S<sub>1</sub> and T<sub>1</sub> optimized geometries in gaseous state.

| Categories       | Molecules    | State          | <sup>a</sup> Transition                      | <sup>b</sup> <i>f</i> | Excitation energy (eV) |
|------------------|--------------|----------------|----------------------------------------------|-----------------------|------------------------|
| <b>D-A</b>       | <b>Cz1</b>   | S <sub>1</sub> | H → L 99.3%                                  | 0.00001               | 0.882                  |
|                  |              | T <sub>1</sub> | H → L 96.2%                                  |                       |                        |
| <b>D-A-D</b>     | <b>Cz2</b>   | S <sub>1</sub> | H → L 99.2%                                  | 0.00004               | 0.859                  |
|                  |              | T <sub>1</sub> | H → L 98.5%                                  |                       |                        |
|                  | <b>Cz2i</b>  | S <sub>1</sub> | H → L 99.3%                                  | 0.00001               | 0.815                  |
|                  |              | T <sub>1</sub> | H → L 97.0%                                  |                       |                        |
| <b>D-π-A</b>     | <b>oCz1</b>  | S <sub>1</sub> | H → L 99.4%                                  | 0.00564               | 1.216                  |
|                  |              | T <sub>1</sub> | H → L 90.3%<br>H-2 → L 7.9%                  |                       |                        |
|                  | <b>mCz1</b>  | S <sub>1</sub> | H → L 99.7%                                  | 0.00061               | 0.97                   |
|                  |              | T <sub>1</sub> | H → L 99.3%                                  |                       |                        |
|                  | <b>pCz1</b>  | S <sub>1</sub> | H → L 99.7%                                  | 0.0011                | 1.111                  |
|                  |              | T <sub>1</sub> | H → L 90.2%<br>H-2 → L 8.6%                  |                       |                        |
| <b>D-π-A-π-D</b> | <b>oCz2</b>  | S <sub>1</sub> | H → L 99.5%                                  | 0.00562               | 1.263                  |
|                  |              | T <sub>1</sub> | H → L 86.8%<br>H-4 → L 10.1%                 |                       |                        |
|                  | <b>oCz2i</b> | S <sub>1</sub> | H → L 99.4%                                  | 0.00629               | 1.299                  |
|                  |              | T <sub>1</sub> | H → L 85.4%<br>H-4 → L 11.0%                 |                       |                        |
|                  | <b>mCz2</b>  | S <sub>1</sub> | H → L 99.7%                                  | 0.00143               | 0.942                  |
|                  |              | T <sub>1</sub> | H → L 98.8%                                  |                       |                        |
|                  | <b>mCz2i</b> | S <sub>1</sub> | H → L 99.7%                                  | 0.00082               | 0.969                  |
|                  |              | T <sub>1</sub> | H → L 94.3%                                  |                       |                        |
|                  | <b>pCz2</b>  | S <sub>1</sub> | H → L 99.5%                                  | 0.00085               | 1.099                  |
|                  |              | T <sub>1</sub> | H-1 → L 72.5%<br>H → L 20.5%<br>H-4 → L 5.9% |                       |                        |
|                  | <b>pCz2i</b> | S <sub>1</sub> | H → L 99.6%                                  | 0.00239               | 1.118                  |
|                  |              | T <sub>1</sub> | H → L 89.5%<br>H-4 → L 8.8%                  |                       |                        |

<sup>a</sup> Dominant transition with the percentage in the examined states; H and L denotes HOMO and LUMO, respectively. <sup>b</sup> Oscillator strength.

**Table S4.** Benchmarking for absorption of the reported molecules (**Cz2i**, **pCz2i**)

| Functional | $\lambda_{\text{abs}}$ , (nm) |              |
|------------|-------------------------------|--------------|
|            | <b>Cz2i</b>                   | <b>pCz2i</b> |
|            |                               |              |

|                                              |               |               |
|----------------------------------------------|---------------|---------------|
| <b>Experimentally</b>                        | 560           | 490           |
| <b><math>\omega^*</math>B97XD/6-31+g(d)</b>  | 567.24        | 471.91        |
| <b><math>\omega^*</math>B97XD/6-31g(d)</b>   | 543.96        | 448.10        |
| <b>LC-<math>\omega^*</math>PBE/6-31+g(d)</b> | 612.65        | 497.30        |
| <b>TPSSH/6-31+g(d)</b>                       | 796.98        | 890.58        |
| <b>SOGGA11X/6-31+g(d)</b>                    | <b>550.35</b> | <b>490.97</b> |
| <b>MPW1K/6-31+g(d)</b>                       | 533.67        | 471.35        |
| <b>M062X/6-31+g(d)</b>                       | 506.57        | 429.15        |

**Cz2i:  $\omega = 0.127$  ( $\omega^*$ B97XD)  $0.162$  (LC- $\omega^*$ PBE)**

***p*Cz2i:  $\omega = 0.132$  ( $\omega^*$ B97XD)  $0.167$  (LC-  $\omega^*$ PBE)**

**(we have used  $\omega^*$ B97XD function with 6-31G(d) basis set.)**

**Table S5.** Absorption data calculated using benchmark function SOGGA11X/6-31+G(d).

| <b>Compound</b>    | <b><math>\lambda_{\text{abs}}</math>, nm</b> | <b>Oscillator Strength</b> | <b>Assignment</b>                                                                     |
|--------------------|----------------------------------------------|----------------------------|---------------------------------------------------------------------------------------|
| <b>Cz1</b>         | 511.3                                        | 0.20890                    | H $\rightarrow$ L 96.9%                                                               |
|                    | 332.0                                        | 0.44480                    | H-2 $\rightarrow$ L 92.7%                                                             |
| <b>Cz2</b>         | 541.0                                        | 0.40430                    | H $\rightarrow$ L 96.6%                                                               |
|                    | 330.5                                        | 0.38710                    | H-5 $\rightarrow$ L 73.7%,<br>H-6 $\rightarrow$ L 16.0%                               |
| <b>Cz2i</b>        | 542.7                                        | 0.42210                    | H $\rightarrow$ L 96.7%                                                               |
|                    | 330.9                                        | 0.32470                    | H-4 $\rightarrow$ L 72.5%,<br>H-6 $\rightarrow$ L 19.0%                               |
| <b><i>o</i>Cz1</b> | 509.5                                        | 0.00260                    | H $\rightarrow$ L 99.1%                                                               |
|                    | 346.2                                        | 0.21960                    | H-3 $\rightarrow$ L 51.6%,<br>H-2 $\rightarrow$ L 28.7%,<br>H-4 $\rightarrow$ L 11.9% |
| <b><i>m</i>Cz1</b> | 491.3                                        | 0.00920                    | H $\rightarrow$ L 98.4%                                                               |
|                    | 332.5                                        | 0.51390                    | H-4 $\rightarrow$ L 60.9%,<br>H-3 $\rightarrow$ L 24.6%,<br>H-2 $\rightarrow$ L 6.8%  |
| <b><i>p</i>Cz1</b> | 485.0                                        | 0.13830                    | H $\rightarrow$ L 94.8%                                                               |
|                    | 331.5                                        | 0.47650                    | H-4 $\rightarrow$ L 75.0%,<br>H-3 $\rightarrow$ L 9.5%,<br>H-2 $\rightarrow$ L 6.7%   |
| <b><i>o</i>Cz2</b> | 497.2                                        | 0.00050                    | H $\rightarrow$ L 98.2%                                                               |
|                    | 357.0                                        | 0.13150                    | H-4 $\rightarrow$ L 89.2%,<br>H-7 $\rightarrow$ L 5.5%                                |

|                     |       |         |                                                                    |
|---------------------|-------|---------|--------------------------------------------------------------------|
| <b><i>oCz2i</i></b> | 495.1 | 0.00640 | H-1 → L 99.0%                                                      |
|                     | 360.2 | 0.21560 | H-4 → L 85.4%,<br>H-5 → L 6.3%                                     |
| <b><i>mCz2</i></b>  | 498.5 | 0.01670 | H → L 98.1%                                                        |
|                     | 319.7 | 0.33790 | H-10 → L 55.6%,<br>H-9 → L 15.4%,<br>H-6 → L 8.7%,<br>H-8 → L 5.7% |
| <b><i>mCz2i</i></b> | 495.5 | 0.03770 | H → L 81.9%,<br>H-1 → L 15.8%                                      |
|                     | 333.2 | 0.45790 | H-8 → L 70.6%,<br>H-7 → L 8.7%,<br>H-6 → L 6.0%                    |
| <b><i>pCz2</i></b>  | 494.7 | 0.26480 | H → L 91.4%                                                        |
|                     | 318.8 | 0.21380 | H-9 → L 64.0%,<br>H-10 → L 10.1%,<br>H-7 → L 8.0%                  |
| <b><i>pCz2i</i></b> | 495.6 | 0.28830 | H → L 93.4%                                                        |
|                     | 331.9 | 0.47640 | H-8 → L 79.4%,<br>H-6 → L 7.4%                                     |

**Table S6.** Charge transfer indices of the molecules at S<sub>1</sub> and T<sub>1</sub> geometries.

| Mol.         | State          | $\Delta r(\text{\AA})$ | $S_m(\text{a.u.})$ | $S_r(\text{a.u.})$ | $D(\text{\AA})$ | $t(\text{\AA})$ | HDI  | EDI  | $\Lambda$ | %CT   | %LE   |
|--------------|----------------|------------------------|--------------------|--------------------|-----------------|-----------------|------|------|-----------|-------|-------|
| <b>Cz1</b>   | S <sub>1</sub> | 5.23                   | 0.0289             | 0.1160             | 5.23            | 3.55            | 8.70 | 6.56 | 0.117     | 93.85 | 6.14  |
|              | T <sub>1</sub> | 4.45                   | 0.1830             | 0.4517             | 4.30            | 2.52            | 7.93 | 6.21 | 0.429     | 75.51 | 24.48 |
| <b>Cz2</b>   | S <sub>1</sub> | 5.41                   | 0.0304             | 0.1207             | 5.41            | 3.71            | 8.73 | 6.34 | 0.122     | 88.97 | 11.02 |
|              | T <sub>1</sub> | 1.94                   | 0.1241             | 0.3817             | 1.95            | -0.428          | 6.13 | 6.15 | 0.388     | 81.82 | 18.17 |
| <b>Cz2i</b>  | S <sub>1</sub> | 5.30                   | 0.0291             | 0.1162             | 5.30            | 3.61            | 8.67 | 6.52 | 0.117     | 92.00 | 7.99  |
|              | T <sub>1</sub> | 0.0018                 | 0.2011             | 0.5317             | 0.003           | -2.66           | 5.91 | 5.98 | 0.491     | 73.13 | 26.86 |
| <b>oCz1</b>  | S <sub>1</sub> | 4.58                   | 0.0320             | 0.1632             | 4.58            | 3.08            | 8.47 | 6.33 | 0.163     | 93.95 | 6.04  |
|              | T <sub>1</sub> | 2.92                   | 0.2621             | 0.5197             | 2.38            | 0.752           | 7.14 | 6.25 | 0.377     | 68.15 | 31.84 |
| <b>mCz1</b>  | S <sub>1</sub> | 7.83                   | 0.0208             | 0.0804             | 7.83            | 6.10            | 8.50 | 6.40 | 0.080     | 96.53 | 3.47  |
|              | T <sub>1</sub> | 7.55                   | 0.0366             | 0.1162             | 7.55            | 5.81            | 8.58 | 6.29 | 0.117     | 94.64 | 5.35  |
| <b>pCz1</b>  | S <sub>1</sub> | 9.31                   | 0.0096             | 0.0510             | 9.31            | 7.56            | 8.56 | 6.52 | 0.051     | 97.82 | 2.17  |
|              | T <sub>1</sub> | 7.59                   | 0.1923             | 0.4458             | 6.52            | 4.16            | 6.80 | 6.10 | 0.336     | 75.47 | 24.52 |
| <b>oCz2</b>  | S <sub>1</sub> | 4.86                   | 0.0312             | 0.1612             | 4.86            | 3.41            | 8.34 | 6.17 | 0.161     | 90.34 | 9.65  |
|              | T <sub>1</sub> | 1.02                   | 0.3379             | 0.5890             | 0.532           | -1.52           | 5.16 | 6.01 | 0.453     | 56.81 | 43.18 |
| <b>oCz2i</b> | S <sub>1</sub> | 4.72                   | 0.0349             | 0.1736             | 4.72            | 2.96            | 8.34 | 6.19 | 0.173     | 89.70 | 10.29 |
|              | T <sub>1</sub> | 0.0023                 | 0.3719             | 0.6236             | 0.002           | -1.82           | 5.18 | 6.03 | 0.460     | 53.25 | 46.74 |
| <b>mCz2</b>  | S <sub>1</sub> | 7.91                   | 0.0204             | 0.0817             | 7.91            | 6.40            | 8.49 | 6.27 | 0.082     | 92.73 | 7.26  |
|              | T <sub>1</sub> | 7.40                   | 0.0359             | 0.1208             | 7.40            | 5.62            | 8.24 | 6.14 | 0.122     | 91.32 | 8.67  |
| <b>mCz2i</b> | S <sub>1</sub> | 7.98                   | 0.0207             | 0.0806             | 7.98            | 6.23            | 8.46 | 6.23 | 0.081     | 93.42 | 6.57  |
|              | T <sub>1</sub> | 6.93                   | 0.0532             | 0.1457             | 5.08            | 2.15            | 7.00 | 6.06 | 0.134     | 90.61 | 9.38  |
| <b>pCz2</b>  | S <sub>1</sub> | 9.39                   | 0.0105             | 0.0514             | 9.39            | 7.78            | 8.56 | 6.44 | 0.051     | 94.15 | 5.84  |
|              | T <sub>1</sub> | 7.86                   | 0.1651             | 0.4093             | 5.29            | 2.34            | 6.28 | 6.00 | 0.296     | 76.94 | 23.06 |
| <b>pCz2i</b> | S <sub>1</sub> | 9.46                   | 0.0102             | 0.0102             | 9.46            | 7.60            | 8.61 | 6.31 | 0.055     | 94.28 | 5.71  |
|              | T <sub>1</sub> | 0.533                  | 0.2092             | 0.4989             | 0.504           | -3.31           | 4.91 | 5.76 | 0.533     | 72.75 | 27.24 |

**Table S7.** SOC of the molecules between  $S_0$ - $T_1$  state for potential RTP molecule

| Molecule    | $H_{SO}(S_0-T_1)$ ( $\text{cm}^{-1}$ ) |
|-------------|----------------------------------------|
| <b>Cz1</b>  | 1.87                                   |
| <b>Cz2</b>  | 2.68                                   |
| <b>Cz2i</b> | 0                                      |

**Table S8**  $k_{ISC}$  and  $k_{RISC}$  rate of all the investigated molecules at external reorganization energy ( $\lambda_{ext}$ ) value variation.

| Mol.        | $k_{ISC}$ ( $\text{s}^{-1}$ ) | $\lambda_{ext}$ (eV) | $k_{RISC}$        |
|-------------|-------------------------------|----------------------|-------------------|
| <b>Cz1</b>  | $1.5 \times 10^8$             | 0.03                 | $1.4 \times 10^2$ |
|             | $1.9 \times 10^8$             | 0.06                 | $1.0 \times 10^2$ |
|             | $2.0 \times 10^8$             | 0.09                 | $8.4 \times 10^1$ |
|             | $2.0 \times 10^8$             | 0.12                 | $6.5 \times 10^1$ |
|             | $1.9 \times 10^8$             | 0.15                 | $5.0 \times 10^1$ |
|             | $1.7 \times 10^8$             | 0.18                 | $3.8 \times 10^1$ |
|             | $1.5 \times 10^8$             | 0.21                 | $2.9 \times 10^1$ |
|             | $1.2 \times 10^8$             | 0.24                 | $2.2 \times 10^1$ |
|             | $1.0 \times 10^8$             | 0.27                 | $1.6 \times 10^1$ |
|             | $8.7 \times 10^7$             | 0.3                  | $1.2 \times 10^1$ |
| <b>Cz2</b>  | $8.0 \times 10^5$             | 0.03                 | $8.1 \times 10^1$ |
|             | $1.9 \times 10^6$             | 0.06                 | $6.5 \times 10^1$ |
|             | $2.9 \times 10^6$             | 0.09                 | $5.2 \times 10^1$ |
|             | $3.6 \times 10^6$             | 0.12                 | $4.1 \times 10^1$ |
|             | $3.8 \times 10^6$             | 0.15                 | $3.2 \times 10^1$ |
|             | $3.7 \times 10^6$             | 0.18                 | $2.5 \times 10^1$ |
|             | $3.4 \times 10^6$             | 0.21                 | $1.9 \times 10^1$ |
|             | $3.0 \times 10^6$             | 0.24                 | $1.5 \times 10^1$ |
|             | $2.6 \times 10^6$             | 0.27                 | $1.1 \times 10^1$ |
|             | $2.1 \times 10^6$             | 0.3                  | $0.8 \times 10^1$ |
| <b>Cz2i</b> | $2.3 \times 10^8$             | 0.03                 | $7.3 \times 10^2$ |
|             | $2.8 \times 10^8$             | 0.06                 | $5.8 \times 10^2$ |
|             | $3.0 \times 10^8$             | 0.09                 | $4.5 \times 10^2$ |
|             | $3.0 \times 10^8$             | 0.12                 | $3.6 \times 10^2$ |
|             | $2.8 \times 10^8$             | 0.15                 | $2.8 \times 10^2$ |
|             | $2.5 \times 10^8$             | 0.18                 | $2.1 \times 10^2$ |
|             | $2.2 \times 10^8$             | 0.21                 | $1.6 \times 10^2$ |
|             | $1.9 \times 10^8$             | 0.24                 | $1.3 \times 10^2$ |
|             | $1.6 \times 10^8$             | 0.27                 | $1.0 \times 10^2$ |
|             | $1.3 \times 10^8$             | 0.3                  | $7.7 \times 10^1$ |
| <b>oCz1</b> | $3.0 \times 10^6$             | 0.03                 | $3.7 \times 10^5$ |
|             | $2.1 \times 10^6$             | 0.06                 | $2.6 \times 10^5$ |
|             | $1.5 \times 10^6$             | 0.09                 | $1.9 \times 10^5$ |
|             | $1.1 \times 10^6$             | 0.12                 | $1.3 \times 10^5$ |
|             | $8.0 \times 10^5$             | 0.15                 | $1.0 \times 10^5$ |
|             | $5.8 \times 10^5$             | 0.18                 | $7.2 \times 10^4$ |

|              |                   |      |                   |
|--------------|-------------------|------|-------------------|
|              | $4.2 \times 10^5$ | 0.21 | $5.2 \times 10^4$ |
|              | $3.0 \times 10^5$ | 0.24 | $3.8 \times 10^4$ |
|              | $2.2 \times 10^5$ | 0.27 | $2.7 \times 10^4$ |
|              | $1.6 \times 10^5$ | 0.3  | $2.0 \times 10^4$ |
| <i>mCz1</i>  | $5.7 \times 10^5$ | 0.03 | $1.7 \times 10^5$ |
|              | $3.9 \times 10^5$ | 0.06 | $1.1 \times 10^5$ |
|              | $2.7 \times 10^5$ | 0.09 | $8.4 \times 10^4$ |
|              | $1.9 \times 10^5$ | 0.12 | $5.9 \times 10^4$ |
|              | $1.3 \times 10^5$ | 0.15 | $4.2 \times 10^4$ |
|              | $9.8 \times 10^4$ | 0.18 | $3.0 \times 10^4$ |
|              | $7.0 \times 10^4$ | 0.21 | $2.1 \times 10^4$ |
|              | $5.0 \times 10^4$ | 0.24 | $1.5 \times 10^4$ |
|              | $3.6 \times 10^4$ | 0.27 | $1.1 \times 10^4$ |
|              | $2.6 \times 10^4$ | 0.3  | $8.3 \times 10^3$ |
| <i>pCz1</i>  | $5.7 \times 10^5$ | 0.03 | $6.9 \times 10^3$ |
|              | $4.1 \times 10^5$ | 0.06 | $5.0 \times 10^3$ |
|              | $3.0 \times 10^5$ | 0.09 | $3.7 \times 10^3$ |
|              | $2.2 \times 10^5$ | 0.12 | $2.7 \times 10^3$ |
|              | $1.6 \times 10^5$ | 0.15 | $1.9 \times 10^3$ |
|              | $1.1 \times 10^5$ | 0.18 | $1.4 \times 10^3$ |
|              | $8.5 \times 10^4$ | 0.21 | $1.0 \times 10^3$ |
|              | $6.2 \times 10^4$ | 0.24 | $7.8 \times 10^2$ |
|              | $4.6 \times 10^4$ | 0.27 | $5.7 \times 10^2$ |
|              | $3.3 \times 10^4$ | 0.3  | $4.2 \times 10^2$ |
| <i>oCz2</i>  | $3.6 \times 10^6$ | 0.03 | $1.3 \times 10^5$ |
|              | $2.6 \times 10^6$ | 0.06 | $1.0 \times 10^5$ |
|              | $1.9 \times 10^6$ | 0.09 | $7.3 \times 10^4$ |
|              | $1.4 \times 10^6$ | 0.12 | $5.3 \times 10^4$ |
|              | $1.0 \times 10^6$ | 0.15 | $3.8 \times 10^4$ |
|              | $7.4 \times 10^5$ | 0.18 | $2.8 \times 10^4$ |
|              | $5.4 \times 10^5$ | 0.21 | $2.0 \times 10^4$ |
|              | $3.9 \times 10^5$ | 0.24 | $1.5 \times 10^4$ |
|              | $2.9 \times 10^5$ | 0.27 | $1.1 \times 10^4$ |
|              | $2.1 \times 10^5$ | 0.3  | $8.1 \times 10^3$ |
| <i>oCz2i</i> | $8.0 \times 10^4$ | 0.03 | $2.2 \times 10^3$ |
|              | $5.9 \times 10^4$ | 0.06 | $1.6 \times 10^3$ |
|              | $4.3 \times 10^4$ | 0.09 | $1.2 \times 10^3$ |
|              | $3.1 \times 10^4$ | 0.12 | $8.9 \times 10^2$ |
|              | $2.3 \times 10^4$ | 0.15 | $6.5 \times 10^2$ |
|              | $1.7 \times 10^4$ | 0.18 | $4.7 \times 10^2$ |
|              | $1.2 \times 10^4$ | 0.21 | $3.5 \times 10^2$ |
|              | $9.1 \times 10^3$ | 0.24 | $2.5 \times 10^2$ |
|              | $6.7 \times 10^3$ | 0.27 | $1.8 \times 10^2$ |
|              | $4.9 \times 10^3$ | 0.3  | $1.3 \times 10^2$ |
| <i>mCz2</i>  | $6.0 \times 10^5$ | 0.03 | $2.7 \times 10^5$ |
|              | $4.0 \times 10^5$ | 0.06 | $1.8 \times 10^5$ |
|              | $2.7 \times 10^5$ | 0.09 | $1.2 \times 10^5$ |
|              | $1.9 \times 10^5$ | 0.12 | $9.0 \times 10^4$ |

|              |                   |      |                   |
|--------------|-------------------|------|-------------------|
|              | $1.3 \times 10^5$ | 0.15 | $6.3 \times 10^4$ |
|              | $9.7 \times 10^4$ | 0.18 | $4.5 \times 10^4$ |
|              | $6.9 \times 10^4$ | 0.21 | $3.2 \times 10^4$ |
|              | $4.9 \times 10^4$ | 0.24 | $2.3 \times 10^4$ |
|              | $3.5 \times 10^4$ | 0.27 | $1.6 \times 10^4$ |
|              | $2.5 \times 10^4$ | 0.3  | $1.1 \times 10^4$ |
| <i>mCz2i</i> | $1.6 \times 10^6$ | 0.03 | $3.6 \times 10^5$ |
|              | $1.1 \times 10^6$ | 0.06 | $2.5 \times 10^5$ |
|              | $7.8 \times 10^5$ | 0.09 | $1.8 \times 10^5$ |
|              | $5.5 \times 10^5$ | 0.12 | $1.2 \times 10^5$ |
|              | $3.9 \times 10^5$ | 0.15 | $9.1 \times 10^4$ |
|              | $2.7 \times 10^5$ | 0.18 | $6.5 \times 10^4$ |
|              | $1.9 \times 10^5$ | 0.21 | $4.7 \times 10^4$ |
|              | $1.4 \times 10^5$ | 0.24 | $3.4 \times 10^4$ |
|              | $1.0 \times 10^5$ | 0.27 | $2.4 \times 10^4$ |
|              | $7.4 \times 10^4$ | 0.3  | $1.7 \times 10^4$ |
| <i>pCz2</i>  | $8.5 \times 10^5$ | 0.03 | $5.4 \times 10^4$ |
|              | $6.0 \times 10^5$ | 0.06 | $3.8 \times 10^4$ |
|              | $4.3 \times 10^5$ | 0.09 | $2.7 \times 10^4$ |
|              | $3.1 \times 10^5$ | 0.12 | $2.0 \times 10^4$ |
|              | $2.2 \times 10^5$ | 0.15 | $1.4 \times 10^4$ |
|              | $1.6 \times 10^5$ | 0.18 | $1.0 \times 10^4$ |
|              | $1.1 \times 10^5$ | 0.21 | $7.6 \times 10^3$ |
|              | $8.3 \times 10^4$ | 0.24 | $5.5 \times 10^3$ |
|              | $6.0 \times 10^4$ | 0.27 | $4.0 \times 10^3$ |
|              | $4.4 \times 10^4$ | 0.3  | $2.9 \times 10^3$ |
| <i>pCz2i</i> | $9.6 \times 10^6$ | 0.03 | $3.5 \times 10^5$ |
|              | $6.9 \times 10^6$ | 0.06 | $2.5 \times 10^5$ |
|              | $5.0 \times 10^6$ | 0.09 | $1.8 \times 10^5$ |
|              | $3.7 \times 10^6$ | 0.12 | $1.3 \times 10^5$ |
|              | $2.6 \times 10^6$ | 0.15 | $9.9 \times 10^4$ |
|              | $1.9 \times 10^6$ | 0.18 | $7.2 \times 10^4$ |
|              | $1.4 \times 10^6$ | 0.21 | $5.3 \times 10^4$ |
|              | $1.0 \times 10^6$ | 0.24 | $3.8 \times 10^4$ |
|              | $7.6 \times 10^5$ | 0.27 | $2.8 \times 10^4$ |
|              | $5.6 \times 10^5$ | 0.3  | $2.0 \times 10^4$ |



### XYZ Coordinates of Cz1 in S<sub>0</sub> optimized geometry

|   |           |          |           |
|---|-----------|----------|-----------|
| N | -0.907113 | 4.526048 | 2.075728  |
| C | -2.118384 | 3.888510 | 2.401430  |
| C | -3.252154 | 4.057167 | 1.451033  |
| C | -3.124416 | 5.015036 | 0.403566  |
| C | -1.898537 | 5.686105 | 0.165859  |
| C | -0.709507 | 5.412570 | 1.012044  |
| C | -4.472912 | 3.383420 | 1.611630  |
| C | -1.789779 | 6.615205 | -0.859726 |
| O | -2.188411 | 3.240506 | 3.433923  |
| O | 0.374353  | 5.940716 | 0.804470  |
| H | -0.832681 | 7.102531 | -1.009021 |
| C | -4.234678 | 5.324758 | -0.428981 |
| C | -4.104264 | 6.277356 | -1.464903 |
| C | -5.265521 | 6.606637 | -2.336022 |
| N | -6.463241 | 5.918458 | -2.074754 |
| C | -6.646567 | 4.970856 | -1.060566 |
| C | -5.469119 | 4.668627 | -0.203768 |
| C | -5.577844 | 3.719750 | 0.786878  |
| H | -6.518846 | 3.197109 | 0.914349  |
| O | -7.731651 | 4.430694 | -0.903772 |
| O | -5.187479 | 7.431224 | -3.234418 |
| C | -2.890773 | 6.914118 | -1.677483 |
| H | -2.816200 | 7.639445 | -2.479857 |
| C | 0.207516  | 4.278394 | 3.000156  |
| H | 0.342662  | 3.202548 | 3.121311  |
| H | 1.098345  | 4.739283 | 2.581423  |
| H | -0.019154 | 4.706206 | 3.979384  |
| C | -7.637654 | 6.201626 | -2.910185 |

|   |           |           |           |
|---|-----------|-----------|-----------|
| H | -7.983056 | 5.277794  | -3.378150 |
| H | -8.445358 | 6.592965  | -2.288133 |
| H | -7.347265 | 6.929834  | -3.662825 |
| N | -4.664819 | 2.335204  | 2.525564  |
| C | -5.717098 | 2.260932  | 3.452799  |
| C | -3.933511 | 1.138146  | 2.585985  |
| C | -5.652209 | 1.011516  | 4.115260  |
| C | -6.680083 | 3.217419  | 3.776557  |
| C | -4.522777 | 0.294739  | 3.556651  |
| C | -2.839859 | 0.728651  | 1.824833  |
| C | -6.588654 | 0.709106  | 5.107314  |
| C | -7.608072 | 2.890138  | 4.765538  |
| H | -6.704784 | 4.184101  | 3.285556  |
| C | -3.989840 | -0.978493 | 3.779920  |
| C | -2.327030 | -0.545498 | 2.060942  |
| H | -2.402282 | 1.376072  | 1.073097  |
| H | -6.547745 | -0.244145 | 5.626041  |
| C | -7.567226 | 1.650064  | 5.423587  |
| H | -8.371434 | 3.614149  | 5.033798  |
| C | -2.889539 | -1.390997 | 3.032009  |
| H | -4.434797 | -1.635015 | 4.521871  |
| H | -1.473338 | -0.887418 | 1.483515  |
| H | -8.301526 | 1.427096  | 6.191402  |
| H | -2.463259 | -2.375791 | 3.196157  |

**XYZ Coordinates of Cz1 in S<sub>1</sub> optimized geometry**

|   |                   |                  |                  |
|---|-------------------|------------------|------------------|
| N | -1.28861635499383 | 4.76817313514933 | 2.49170007082686 |
| C | -2.37504569100190 | 3.89137604208783 | 2.51961503789996 |
| C | -3.39714696945524 | 4.07838569207335 | 1.49579527884364 |
| C | -3.25599442612966 | 5.11302564026762 | 0.53097620517443 |

|   |                   |                  |                   |
|---|-------------------|------------------|-------------------|
| C | -2.13254318815609 | 5.97398212050452 | 0.54646447882113  |
| C | -1.08994617495675 | 5.81548596520456 | 1.56047386362386  |
| C | -4.55276708265347 | 3.25699494848136 | 1.41583805428864  |
| C | -2.01039760913394 | 6.99349472370980 | -0.41776444615820 |
| O | -2.42659881802760 | 3.01009859664129 | 3.39239634806094  |
| O | -0.09104393252574 | 6.53046096267063 | 1.62724614352910  |
| H | -1.13494697776301 | 7.63099444896422 | -0.37103899323230 |
| C | -4.25937988255052 | 5.29700850891950 | -0.47705318205765 |
| C | -4.10982481041554 | 6.32943432661999 | -1.43227136415992 |
| C | -5.12844682089160 | 6.53116717629905 | -2.47047198199318 |
| N | -6.22879025350421 | 5.64672073838847 | -2.44558162666940 |
| C | -6.42391648408356 | 4.61028658186587 | -1.52283382109527 |
| C | -5.38866668826974 | 4.44337757965403 | -0.50467715257132 |
| C | -5.52376531706543 | 3.42293405808194 | 0.45282108102922  |
| H | -6.39928670253560 | 2.78532106600819 | 0.40872980433795  |
| O | -7.42735668739104 | 3.89422803008217 | -1.59325636595666 |
| O | -5.04837519833572 | 7.41426832479106 | -3.32370124021600 |
| C | -2.98166799414728 | 7.16892983747610 | -1.39041108050490 |
| H | -2.90044937859882 | 7.94945346615274 | -2.13824255364063 |
| C | -0.27706894685300 | 4.56186348332151 | 3.53056930094749  |
| H | 0.13665342473509  | 3.55398704962917 | 3.45039508956569  |
| H | 0.49969974554070  | 5.30927156219582 | 3.39024830225809  |
| H | -0.73503944295446 | 4.65928789917196 | 4.51755233612934  |
| C | -7.27336753734111 | 5.80277709890288 | -3.45984880759117 |
| H | -7.36866709984411 | 4.87980036584514 | -4.03643686524715 |
| H | -8.23314995564634 | 5.99595653088816 | -2.97502704171070 |
| H | -6.99296086472526 | 6.63267432462919 | -4.10361230153570 |
| N | -4.74454557677453 | 2.18983498540488 | 2.38038344507292  |
| C | -5.37406576168043 | 2.32512520864526 | 3.59275274002539  |

|   |                   |                   |                  |
|---|-------------------|-------------------|------------------|
| C | -4.27684741525268 | 0.90600853031191  | 2.24288677824300 |
| C | -5.32868832582373 | 1.08136744522097  | 4.28466028271249 |
| C | -5.98297896232147 | 3.46778697939429  | 4.12751736703045 |
| C | -4.61484949372388 | 0.15829185715396  | 3.40639906755166 |
| C | -3.57576609743612 | 0.35262301788994  | 1.16414017147269 |
| C | -5.90500594743946 | 0.98434969143824  | 5.53641514273440 |
| C | -6.55864066433693 | 3.34830527161968  | 5.39118869891170 |
| H | -5.99486066576324 | 4.39672770271584  | 3.57186973274005 |
| C | -4.24060140377949 | -1.16909971090761 | 3.48770637970471 |
| C | -3.20811679867909 | -0.98808597001181 | 1.26605985901651 |
| H | -3.33496586862920 | 0.95413279442216  | 0.29693028125117 |
| H | -5.88586094119812 | 0.05399834238091  | 6.09429860499580 |
| C | -6.52213056331689 | 2.13076141658930  | 6.08514965753924 |
| H | -7.03923604601684 | 4.20822734518440  | 5.84365593377671 |
| C | -3.53309908511386 | -1.73761712572755 | 2.40501290306043 |
| H | -4.47768188158190 | -1.76833311736007 | 4.36058949814400 |
| H | -2.66254908441377 | -1.45622467930755 | 0.45466588281710 |
| H | -6.97632694813079 | 2.06492806960769  | 7.06806472851021 |
| H | -3.23387834891263 | -2.77885633934237 | 2.46007627369308 |

**XYZ Coordinates of Cz1 in T<sub>1</sub> optimized geometry**

|   |                   |                  |                   |
|---|-------------------|------------------|-------------------|
| N | -1.00859782673070 | 4.48874219461573 | 2.14002731733257  |
| C | -2.24722256445003 | 3.90648089881322 | 2.44433153552104  |
| C | -3.30121488234146 | 4.03845962218708 | 1.43219381181007  |
| C | -3.14083336191878 | 4.97644558149132 | 0.38631112326045  |
| C | -1.89352906084526 | 5.61372723106334 | 0.16748702962912  |
| C | -0.75100993698117 | 5.33497484463291 | 1.04786676388600  |
| C | -4.58663280837613 | 3.36975863725387 | 1.56966398789117  |
| C | -1.73704593905612 | 6.52922446361769 | -0.89788606624951 |
| O | -2.39465484749936 | 3.30998874473872 | 3.51334245183287  |

|   |                   |                  |                   |
|---|-------------------|------------------|-------------------|
| O | 0.36263745759683  | 5.82384448767589 | 0.86698652801794  |
| H | -0.76381146788630 | 6.98591685906868 | -1.03490639921623 |
| C | -4.24651437836750 | 5.30363206170311 | -0.46650935055104 |
| C | -4.07137398725677 | 6.22478672627431 | -1.50583099672056 |
| C | -5.19712731443047 | 6.57989929730466 | -2.38598194894189 |
| N | -6.42586658780761 | 5.95192092527841 | -2.11342854254449 |
| C | -6.65925271349901 | 5.02960675098966 | -1.08150304783863 |
| C | -5.51540934794125 | 4.70108085675257 | -0.22869893800748 |
| C | -5.66268510810262 | 3.74056130173243 | 0.78098261424700  |
| H | -6.62007899948592 | 3.24152727714822 | 0.87973314762766  |
| O | -7.77929719263255 | 4.54160523108128 | -0.92547775934187 |
| O | -5.07836417853430 | 7.37899830294441 | -3.31266949481898 |
| C | -2.80203884918048 | 6.82932947596689 | -1.72038249794608 |
| H | -2.71013038624429 | 7.53343105757823 | -2.53950467234816 |
| C | 0.06045640767955  | 4.26325970298478 | 3.11885909962314  |
| H | 0.15094988257637  | 3.19346988691752 | 3.31452285453045  |
| H | 0.98168361596048  | 4.66567211945223 | 2.70506578174133  |
| H | -0.18232734032186 | 4.76127488274235 | 4.06096180587601  |
| C | -7.58030046621480 | 6.27064753032267 | -2.95913926049965 |
| H | -7.95290984199273 | 5.35863952770009 | -3.43074033415421 |
| H | -8.38259458949502 | 6.68569094174817 | -2.34508923411614 |
| H | -7.25863575342431 | 6.98860970203720 | -3.70922776767168 |
| N | -4.74889102240893 | 2.31855524891095 | 2.48930472057063  |
| C | -5.74251761983187 | 2.23088280920948 | 3.46718224168422  |
| C | -3.97640579024247 | 1.15127385784856 | 2.52760802677282  |
| C | -5.58958169151117 | 1.00541381898276 | 4.16556481464335  |
| C | -6.72204045696728 | 3.16655150745659 | 3.80948382993210  |
| C | -4.46157013344405 | 0.31321346287932 | 3.55821848118674  |
| C | -2.93568945779964 | 0.76824123269205 | 1.68190181234536  |

|   |                   |                   |                  |
|---|-------------------|-------------------|------------------|
| C | -6.44715927659255 | 0.70714310099189  | 5.21833268566749 |
| C | -7.57467683544116 | 2.84390850912721  | 4.86498752092588 |
| H | -6.81062181349658 | 4.10506120987706  | 3.27533664585929 |
| C | -3.85920517544332 | -0.92150799042905 | 3.77589296317145 |
| C | -2.33684527899301 | -0.46854204324147 | 1.92351239650689 |
| H | -2.60572072967522 | 1.40828501125055  | 0.87183916920579 |
| H | -6.34260027704839 | -0.22105190189666 | 5.77143452955025 |
| C | -7.44340749190187 | 1.63145028814627  | 5.55923274302649 |
| H | -8.34988547959776 | 3.54604790375689  | 5.15381343180238 |
| C | -2.78760220144821 | -1.30197672632697 | 2.95746234167792 |
| H | -4.21694051501788 | -1.58213007406450 | 4.55955756053826 |
| H | -1.51592051935723 | -0.79325777202379 | 1.29245981894664 |
| H | -8.12123971199172 | 1.40877279398983  | 6.37719311243770 |
| H | -2.30731615458596 | -2.26206937095476 | 3.11733761168808 |

**XYZ Coordinates of Cz2 in S<sub>0</sub> optimized geometry**

|   |           |           |           |
|---|-----------|-----------|-----------|
| N | 1.072155  | 0.157809  | 0.099506  |
| C | -0.176169 | -0.439343 | 0.332626  |
| C | -1.133280 | -0.406493 | -0.807985 |
| C | -0.899811 | 0.508772  | -1.876845 |
| C | 0.316266  | 1.248048  | -1.962951 |
| C | 1.423137  | 0.904904  | -1.031510 |
| C | -2.309034 | -1.176065 | -0.804238 |
| C | 0.475984  | 2.200055  | -2.983199 |
| O | -0.433439 | -0.951986 | 1.410305  |
| O | 2.584147  | 1.247615  | -1.193145 |
| C | -1.896449 | 0.686464  | -2.875760 |
| C | -1.679245 | 1.600540  | -3.932450 |
| C | -2.705615 | 1.794848  | -4.994462 |

|   |           |           |           |
|---|-----------|-----------|-----------|
| N | -3.882144 | 1.039238  | -4.871925 |
| C | -4.151094 | 0.125098  | -3.844855 |
| C | -3.099431 | -0.052614 | -2.808011 |
| C | -3.292886 | -0.972103 | -1.800724 |
| H | -4.198848 | -1.566832 | -1.793709 |
| O | -5.209089 | -0.486086 | -3.821774 |
| O | -2.534564 | 2.567584  | -5.925291 |
| C | -0.524076 | 2.350450  | -3.973014 |
| H | -0.397548 | 3.084459  | -4.760096 |
| C | -4.932230 | 1.195130  | -5.887119 |
| H | -5.111399 | 0.236790  | -6.378743 |
| H | -5.859767 | 1.512111  | -5.406561 |
| H | -4.597436 | 1.938132  | -6.606164 |
| C | 2.131120  | -0.011746 | 1.103760  |
| H | 2.956551  | -0.582098 | 0.672808  |
| H | 2.511172  | 0.968105  | 1.399185  |
| H | 1.704774  | -0.533777 | 1.956164  |
| N | -2.549343 | -2.202795 | 0.122947  |
| C | -1.718338 | -3.305466 | 0.375674  |
| C | -3.714062 | -2.336625 | 0.895682  |
| C | -0.485556 | -3.634546 | -0.186688 |
| C | -2.359316 | -4.152276 | 1.310044  |
| C | -4.805925 | -1.475097 | 1.009865  |
| C | -3.625038 | -3.532549 | 1.648254  |
| C | 0.110292  | -4.829679 | 0.211894  |
| H | -0.003843 | -2.985521 | -0.909838 |
| C | -1.742038 | -5.345244 | 1.698215  |
| C | -5.832812 | -1.845703 | 1.878310  |
| H | -4.854560 | -0.546025 | 0.452592  |

|   |           |           |           |
|---|-----------|-----------|-----------|
| C | -4.664155 | -3.880151 | 2.515560  |
| C | -0.505887 | -5.676745 | 1.148604  |
| H | 1.071658  | -5.107060 | -0.209963 |
| H | -2.226230 | -6.003397 | 2.413673  |
| C | -5.767547 | -3.035397 | 2.622089  |
| H | -6.695902 | -1.195330 | 1.983265  |
| H | -4.606272 | -4.793559 | 3.100202  |
| H | -0.013632 | -6.598648 | 1.442263  |
| H | -6.582279 | -3.294095 | 3.291256  |
| N | 1.575528  | 3.070118  | -3.050873 |
| C | 2.014344  | 3.936482  | -2.037015 |
| C | 2.374112  | 3.274851  | -4.187896 |
| C | 1.506104  | 4.129522  | -0.752780 |
| C | 3.095345  | 4.703167  | -2.531464 |
| C | 2.343985  | 2.623594  | -5.421839 |
| C | 3.329987  | 4.277713  | -3.896944 |
| C | 2.109954  | 5.100270  | 0.044159  |
| H | 0.669201  | 3.547200  | -0.382970 |
| C | 3.688301  | 5.670003  | -1.713690 |
| C | 3.276569  | 3.016009  | -6.382193 |
| H | 1.629439  | 1.834436  | -5.628430 |
| C | 4.257777  | 4.650178  | -4.873280 |
| C | 3.193868  | 5.861137  | -0.425698 |
| H | 1.734061  | 5.267466  | 1.049110  |
| H | 4.518466  | 6.264321  | -2.083933 |
| C | 4.222121  | 4.019760  | -6.115752 |
| H | 3.271951  | 2.528279  | -7.352262 |
| H | 4.997391  | 5.416452  | -4.660711 |
| H | 3.645818  | 6.606184  | 0.221682  |



H 4.936073 4.300295 -6.883888

**XYZ Coordinates of Cz2 in S<sub>1</sub> optimized geometry**

|   |                   |                   |                   |
|---|-------------------|-------------------|-------------------|
| N | 0.98499840892130  | 0.11587762596984  | 0.06896308499027  |
| C | -0.15076291658878 | -0.68630847255742 | 0.14088039728344  |
| C | -1.10782401249532 | -0.53686281171976 | -0.95243366935203 |
| C | -0.89225834827665 | 0.42576740416877  | -1.97977892730381 |
| C | 0.25516627975767  | 1.26807778270663  | -1.96756854867890 |
| C | 1.29508552629797  | 1.04007528105250  | -0.95759612025114 |
| C | -2.27427367045122 | -1.34502028709898 | -1.03014500080594 |
| C | 0.39488164716829  | 2.25330591901815  | -2.98660874282965 |
| O | -0.31222213970472 | -1.48361486538762 | 1.07828824836053  |
| O | 2.39665540542576  | 1.58009108132915  | -0.93657541077090 |
| C | -1.84654558076103 | 0.53563168706207  | -3.04739537300730 |
| C | -1.63744496817579 | 1.48284997176640  | -4.07566071548876 |
| C | -2.59210175967249 | 1.61242589738354  | -5.18471295885984 |
| N | -3.70391912723755 | 0.74590518194829  | -5.15125987318465 |
| C | -3.96247251589073 | -0.20751018134342 | -4.15878631482356 |
| C | -2.98549076681492 | -0.30279648725319 | -3.07368145920958 |
| C | -3.19117423443756 | -1.24325699198320 | -2.05161075765083 |
| H | -4.07294609414301 | -1.87212908254693 | -2.09422484080219 |
| O | -4.96886351847463 | -0.91881494262459 | -4.22470104804650 |
| O | -2.44708161332694 | 2.42367343559593  | -6.09776557590800 |
| C | -0.53246356925127 | 2.33980266333539  | -4.01920426525142 |
| H | -0.41926876044922 | 3.09649575224718  | -4.78649801895047 |
| C | -4.68956225079524 | 0.82926338878965  | -6.23146734335184 |
| H | -4.75783965996074 | -0.13326153013864 | -6.74364898709501 |
| H | -5.67299649661626 | 1.05937482581437  | -5.81551489789677 |
| H | -4.36856457138414 | 1.60883575345764  | -6.91774946806838 |
| C | 2.01442614513270  | -0.03271283192057 | 1.10234410749930  |

|   |                   |                   |                   |
|---|-------------------|-------------------|-------------------|
| H | 2.92925877036844  | -0.43453206346072 | 0.66042585458627  |
| H | 2.24964635412168  | 0.94765571353162  | 1.52050645724941  |
| H | 1.63073831522352  | -0.70362975698644 | 1.86619428956000  |
| N | -2.54073983378165 | -2.33519277045218 | -0.00417779402988 |
| C | -2.09610313107184 | -3.63451828734986 | -0.02422274646450 |
| C | -3.24672954816520 | -2.10516108293972 | 1.15148765021682  |
| C | -1.33945755060955 | -4.27351916303873 | -1.01436253076262 |
| C | -2.52622974752537 | -4.29335304437101 | 1.16226897768878  |
| C | -3.86342313185647 | -0.91810624765563 | 1.56568622576717  |
| C | -3.27452852787181 | -3.29883020754318 | 1.92680565443252  |
| C | -1.01034603840437 | -5.61061547781164 | -0.79776981902344 |
| H | -1.02842563774626 | -3.73820840419713 | -1.90240512091152 |
| C | -2.18899071457935 | -5.61883480717666 | 1.35771480977678  |
| C | -4.52300741992544 | -0.94007106770143 | 2.79348308231286  |
| H | -3.81877417479123 | -0.02930555375281 | 0.94930922135585  |
| C | -3.93326207176979 | -3.29924644910374 | 3.14135663017785  |
| C | -1.42589044390612 | -6.27352770915585 | 0.36527416460869  |
| H | -0.42421564489287 | -6.14378188447378 | -1.53753846101531 |
| H | -2.49615314283529 | -6.15171270829225 | 2.25147694846897  |
| C | -4.55897821796409 | -2.10715718274942 | 3.56904648510621  |
| H | -5.01288093025566 | -0.04267415572369 | 3.15377652262933  |
| H | -3.97141214253078 | -4.18925299128439 | 3.76068293673615  |
| H | -1.15483172703487 | -7.31382291433356 | 0.51008619891498  |
| H | -5.07764070373472 | -2.09691415498440 | 4.52170067867953  |
| N | 1.44525402502061  | 3.20270412438022  | -2.97403531886290 |
| C | 1.67227797187084  | 4.15946380396096  | -1.98543852056450 |
| C | 2.42457411872842  | 3.33866359945665  | -3.95946143320547 |
| C | 0.94282847625468  | 4.41859961821089  | -0.82489089163925 |
| C | 2.80793884882658  | 4.92827637231336  | -2.34096174268505 |

|   |                  |                  |                   |
|---|------------------|------------------|-------------------|
| C | 2.61250711804025 | 2.59854922624413 | -5.12798358074717 |
| C | 3.29287850855298 | 4.40093181263004 | -3.59905241709155 |
| C | 1.37261807785055 | 5.46363618294088 | -0.01052402419799 |
| H | 0.07534447732124 | 3.82017537737448 | -0.56768827022750 |
| C | 3.21977035959460 | 5.97335458523487 | -1.50711615913787 |
| C | 3.68789947428583 | 2.94400727233588 | -5.94493728505475 |
| H | 1.94288887989775 | 1.78598192167271 | -5.38812818935702 |
| C | 4.36464090347954 | 4.72689694666834 | -4.43611655754316 |
| C | 2.50025328211671 | 6.23527893630352 | -0.34398363182463 |
| H | 0.82445007403527 | 5.68564071144829 | 0.90070875792655  |
| H | 4.08799693080929 | 6.57187879105453 | -1.76839087708045 |
| C | 4.55643523202875 | 3.99669292674966 | -5.60689571429571 |
| H | 3.85603937805249 | 2.38609690982265 | -6.86157998858336 |
| H | 5.03800250542108 | 5.53745939267838 | -4.17172878139971 |
| H | 2.80986203595593 | 7.04282783996838 | 0.31259682753891  |
| H | 5.38414152560021 | 4.24056885248658 | -6.26603003857434 |

**XYZ Coordinates of Cz2 in T<sub>1</sub> optimized geometry**

|   |                   |                   |                   |
|---|-------------------|-------------------|-------------------|
| N | 1.04398903795303  | 0.16090661861977  | 0.07168095435577  |
| C | -0.15854749424346 | -0.54671394000673 | 0.24141468922766  |
| C | -1.12314826399394 | -0.43767169698352 | -0.85346467160672 |
| C | -0.91189950826282 | 0.50695996803359  | -1.89508565663299 |
| C | 0.27996380733554  | 1.27822523716045  | -1.95101959019070 |
| C | 1.35528273364198  | 1.01418700157755  | -0.99646596394751 |
| C | -2.32768632313450 | -1.19907890363330 | -0.85843165852733 |
| C | 0.43111441201833  | 2.22878802123473  | -3.00141145568624 |
| O | -0.34774296988833 | -1.21728908784741 | 1.26004064328919  |
| O | 2.48728685578959  | 1.50092297469420  | -1.06425608761692 |
| C | -1.91788476761164 | 0.68412526552073  | -2.90698385425272 |
| C | -1.70181988606508 | 1.60079645099187  | -3.96183893055101 |

|   |                   |                   |                   |
|---|-------------------|-------------------|-------------------|
| C | -2.70615014435367 | 1.78802361556076  | -5.01682892610082 |
| N | -3.88392506517400 | 1.02882367275712  | -4.89074082831691 |
| C | -4.15870475007672 | 0.11439005680432  | -3.86170331378701 |
| C | -3.11765797785448 | -0.05998022271249 | -2.84330949989394 |
| C | -3.30733131380099 | -0.99915194417569 | -1.82091320172234 |
| H | -4.21275227719239 | -1.59559872088186 | -1.82301927865531 |
| O | -5.22734862397852 | -0.49643567846213 | -3.84658221140494 |
| O | -2.54093969373913 | 2.56206838728437  | -5.95951365531687 |
| C | -0.53084868545433 | 2.36990110146824  | -3.99219809573374 |
| H | -0.41175470152306 | 3.10600508442916  | -4.77906662518349 |
| C | -4.92994757968310 | 1.18284313903150  | -5.90534533508866 |
| H | -5.11298546812782 | 0.22352327546565  | -6.39491290624499 |
| H | -5.85991631778646 | 1.50017794042689  | -5.42843394639525 |
| H | -4.59165801998562 | 1.92395438213368  | -6.62513868747528 |
| C | 2.09854701359997  | -0.00320936434981 | 1.07788278009637  |
| H | 2.97503069159624  | -0.46886695690044 | 0.62092877082970  |
| H | 2.39758198245851  | 0.97643963265815  | 1.45605501347943  |
| H | 1.70438968906808  | -0.62521746618744 | 1.87717758295761  |
| N | -2.54362718883391 | -2.24398830081462 | 0.08201883660668  |
| C | -1.79887536166972 | -3.41746636424009 | 0.17929957516043  |
| C | -3.57147267928214 | -2.28305754745781 | 1.01448281142405  |
| C | -0.69659355521823 | -3.81561793435684 | -0.57720286340682 |
| C | -2.35645931212998 | -4.23292165318335 | 1.19487101178638  |
| C | -4.54920186116219 | -1.31972324484691 | 1.27847719111542  |
| C | -3.49311703924530 | -3.50425338226702 | 1.73634640722866  |
| C | -0.14142889866094 | -5.06292720872786 | -0.29252473323287 |
| H | -0.28969024220886 | -3.17234287557971 | -1.34905888745536 |
| C | -1.78781549834197 | -5.47513074326274 | 1.46142150880822  |
| C | -5.47150272681500 | -1.60396876906350 | 2.28496621507708  |

|   |                   |                   |                   |
|---|-------------------|-------------------|-------------------|
| H | -4.57958113117560 | -0.39143088227651 | 0.71958050755670  |
| C | -4.42144857492850 | -3.76264503240935 | 2.73921497297711  |
| C | -0.67595208436360 | -5.88265488071486 | 0.71347003551504  |
| H | 0.71949263683330  | -5.40336344181397 | -0.85908201690265 |
| H | -2.20028179677720 | -6.11845422346681 | 2.23276360669528  |
| C | -5.41111765500610 | -2.80718421484667 | 3.00647517150422  |
| H | -6.24597159753023 | -0.87976759739200 | 2.51639841082448  |
| H | -4.37885720059403 | -4.68664241622793 | 3.30775954006300  |
| H | -0.22186691373342 | -6.84819170577899 | 0.91301936932149  |
| H | -6.14086851735329 | -2.99863317090072 | 3.78694204675588  |
| N | 1.54233957258700  | 3.11435408511639  | -3.03765002072034 |
| C | 1.84275225441890  | 4.08346347028384  | -2.08175130195046 |
| C | 2.47239964121090  | 3.19269473081337  | -4.06683076787350 |
| C | 1.16130123116672  | 4.38798604428955  | -0.90310770949442 |
| C | 2.99158936177288  | 4.79989308334535  | -2.49864583510040 |
| C | 2.56677437876430  | 2.41249761396384  | -5.22288600618437 |
| C | 3.39987257130376  | 4.22753837444775  | -3.77192873784999 |
| C | 1.66167232200188  | 5.43128394024238  | -0.12474640203602 |
| H | 0.28228245297255  | 3.82706916634241  | -0.60676464767394 |
| C | 3.47432904283598  | 5.83793415101269  | -1.70664992737761 |
| C | 3.61240708883107  | 2.69451438353798  | -6.10125827755255 |
| H | 1.85243610996159  | 1.62138040085343  | -5.41995247553475 |
| C | 4.43742963202343  | 4.48674949779424  | -4.66121108303869 |
| C | 2.80385891950245  | 6.14667084224225  | -0.51666527694843 |
| H | 1.15818291750313  | 5.69228636597737  | 0.80072643709445  |
| H | 4.35257816620462  | 6.40102079936718  | -2.00756581846705 |
| C | 4.53577456661547  | 3.71645022927642  | -5.82748369472232 |
| H | 3.71490514091041  | 2.11031721792043  | -7.01015189973056 |
| H | 5.16038065688283  | 5.26973915534205  | -4.45370820221231 |

H 3.17108325960190 6.95284781417615 0.11060225120003  
H 5.34071351959398 3.91036437957124 -6.52946937515312

**XYZ Coordinates of Cz2i in S<sub>0</sub> optimized geometry**

N 0.179713 -0.164646 -0.668368  
C -1.034940 -0.731673 -0.239664  
C -2.237517 -0.488274 -1.084194  
C -2.158510 0.484105 -2.119535  
C -0.918875 1.086673 -2.454745  
C 0.330493 0.722435 -1.736149  
C -3.469809 -1.109161 -0.824800  
C -0.853513 2.055943 -3.432711  
O -1.051117 -1.385038 0.791228  
O 1.420066 1.181327 -2.050157  
H 0.101191 2.528218 -3.633081  
C -3.314126 0.879388 -2.849893  
C -3.235081 1.851552 -3.885409  
C -4.437693 2.094752 -4.730002  
N -5.652875 1.530338 -4.299354  
C -5.803329 0.642025 -3.232538  
C -4.553832 0.277068 -2.514501  
C -4.619182 -0.692373 -1.536724  
H -5.573945 -1.164482 -1.336233  
O -6.892873 0.182890 -2.918802  
O -4.421029 2.745990 -5.762208  
C -2.002795 2.472346 -4.144938  
C -6.830360 1.861166 -5.113169  
H -7.705198 1.443351 -4.621746  
H -6.912634 2.945383 -5.203701  
H -6.718780 1.442398 -6.115808

|   |           |           |           |
|---|-----------|-----------|-----------|
| C | 1.356697  | -0.494588 | 0.146536  |
| H | 1.447341  | -1.579025 | 0.227001  |
| H | 2.230128  | -0.065612 | -0.337697 |
| H | 1.237654  | -0.086575 | 1.152657  |
| N | -3.627182 | -2.175177 | 0.075204  |
| C | -2.943070 | -3.400758 | 0.038975  |
| C | -4.597657 | -2.237779 | 1.088442  |
| C | -1.935621 | -3.829086 | -0.824307 |
| C | -3.480164 | -4.250533 | 1.034198  |
| C | -5.490301 | -1.256400 | 1.521240  |
| C | -4.527722 | -3.508963 | 1.707720  |
| C | -1.455266 | -5.127806 | -0.666908 |
| H | -1.537399 | -3.177263 | -1.593948 |
| C | -2.980843 | -5.548757 | 1.177119  |
| C | -6.343509 | -1.579508 | 2.576550  |
| H | -5.518029 | -0.274772 | 1.061148  |
| C | -5.388618 | -3.807332 | 2.767236  |
| C | -1.966089 | -5.980343 | 0.326236  |
| H | -0.667978 | -5.483716 | -1.324665 |
| H | -3.385948 | -6.209649 | 1.937810  |
| C | -6.297933 | -2.840630 | 3.193013  |
| H | -7.051836 | -0.836038 | 2.929282  |
| H | -5.343560 | -4.777798 | 3.252705  |
| H | -1.566399 | -6.984594 | 0.427293  |
| H | -6.973909 | -3.060011 | 4.013607  |
| N | -1.845527 | 3.538099  | -5.045291 |
| C | -0.875248 | 3.600352  | -6.058731 |
| C | -2.530337 | 4.763291  | -5.010015 |
| C | 0.017848  | 2.619112  | -6.490836 |

|   |           |          |           |
|---|-----------|----------|-----------|
| C | -0.945905 | 4.871028 | -6.678986 |
| C | -3.538045 | 5.191722 | -4.147059 |
| C | -1.993790 | 5.612570 | -6.005968 |
| C | 0.870789  | 2.941839 | -7.546491 |
| H | 0.046190  | 1.637829 | -6.030052 |
| C | -0.085239 | 5.169017 | -7.738801 |
| C | -4.019186 | 6.490018 | -4.305520 |
| H | -3.935836 | 4.540283 | -3.376865 |
| C | -2.493878 | 6.910393 | -6.149916 |
| C | 0.824528  | 4.202456 | -8.163931 |
| H | 1.579443  | 2.198426 | -7.898686 |
| H | -0.130856 | 6.139102 | -8.224989 |
| C | -3.508878 | 7.342049 | -5.299372 |
| H | -4.806674 | 6.846018 | -3.648051 |
| H | -2.089205 | 7.570913 | -6.911156 |
| H | 1.500332  | 4.421540 | -8.984746 |
| H | -3.909191 | 8.345971 | -5.401242 |

**XYZ Coordinates of Cz2i in S<sub>1</sub> optimized geometry**

|   |                   |                   |                   |
|---|-------------------|-------------------|-------------------|
| N | -0.31766482076623 | 0.25376976668364  | -0.03048783169925 |
| C | -1.39494366914635 | -0.65991229362191 | -0.02130100904699 |
| C | -2.43596015184713 | -0.47340970026957 | -1.04775818503954 |
| C | -2.29065418622031 | 0.57156968129271  | -1.99977560201398 |
| C | -1.17322518887350 | 1.44318328671034  | -1.95686578798590 |
| C | -0.13361872931602 | 1.30138722981154  | -0.93636666773506 |
| C | -3.57945264933301 | -1.31426744548894 | -1.12748959877251 |
| C | -1.03757888406289 | 2.47260591643042  | -2.90365108556735 |
| O | -1.40180680064954 | -1.54508470820977 | 0.82873629992989  |
| O | 0.84430154629358  | 2.05251571315494  | -0.87648403548643 |
| H | -0.16932542969791 | 3.11797491545942  | -2.83724205722827 |



|   |                   |                   |                   |
|---|-------------------|-------------------|-------------------|
| C | -3.27672446588811 | 0.76228585522749  | -3.02732050558380 |
| C | -3.13395463369282 | 1.80511765614390  | -3.98242340554595 |
| C | -4.14244033057348 | 1.99018239991720  | -5.02335238959510 |
| N | -5.22090218045534 | 1.10531159709176  | -5.02295909892951 |
| C | -5.42286468231036 | 0.04926394081681  | -4.10479016740161 |
| C | -4.39341048680085 | -0.10416404835098 | -3.07612278006972 |
| C | -4.52709942067564 | -1.12501423706502 | -2.12285154903344 |
| H | -5.39396046058498 | -1.77325916589763 | -2.16968072337218 |
| O | -6.41065366526873 | -0.67745749037775 | -4.19023623912556 |
| O | -4.08149915770994 | 2.87909669683135  | -5.88629917420724 |
| C | -1.99204816329714 | 2.63992323632528  | -3.88105679061666 |
| C | -6.21711520187148 | 1.31084986806933  | -6.07728012294730 |
| H | -6.99236797761998 | 0.55917202714526  | -5.95236537949461 |
| H | -6.63616258768204 | 2.31648291155946  | -5.99895209218605 |
| H | -5.74314390037395 | 1.21870917958497  | -7.05712935279115 |
| C | 0.69001062591146  | 0.04397095779645  | 1.01288841906705  |
| H | 1.13574942532073  | -0.94702215067621 | 0.90160953966023  |
| H | 1.44416711352429  | 0.82006252048930  | 0.91005463246044  |
| H | 0.21490802020426  | 0.08801619451289  | 1.99502910096257  |
| N | -3.80187123678229 | -2.36938745269439 | -0.20009319424743 |
| C | -3.29830674784991 | -3.66136478549799 | -0.32479900779430 |
| C | -4.29987129182824 | -2.20801813138360 | 1.08965011746522  |
| C | -2.67472495435736 | -4.25829671104476 | -1.42031636577986 |
| C | -3.52341356458925 | -4.36258203896951 | 0.88734896787411  |
| C | -4.86787387954248 | -1.07691483348549 | 1.67528935441255  |
| C | -4.16481413968779 | -3.43216790167772 | 1.79259985343124  |
| C | -2.27798402290713 | -5.58817831512850 | -1.29004339970364 |
| H | -2.50754679852895 | -3.70191913261533 | -2.33691791511140 |
| C | -3.12109861755671 | -5.69824833341933 | 0.98962666852794  |

|   |                   |                   |                   |
|---|-------------------|-------------------|-------------------|
| C | -5.31161265646027 | -1.18704155308115 | 2.99199869288558  |
| H | -4.95590857925443 | -0.14792534640637 | 1.12125943013532  |
| C | -4.62381108585963 | -3.51788689583285 | 3.11100737679241  |
| C | -2.49952649232090 | -6.30434844130587 | -0.10015030006178 |
| H | -1.78881967046970 | -6.08021692615236 | -2.12599162141950 |
| H | -3.28689531041600 | -6.25117297351224 | 1.91010509067232  |
| C | -5.19466635419364 | -2.39395050264459 | 3.70449055609788  |
| H | -5.75717124130943 | -0.32253019395317 | 3.47605631160626  |
| H | -4.52963695163614 | -4.44822589767008 | 3.66425921431169  |
| H | -2.17984335784303 | -7.33989153713439 | -0.03166254457616 |
| H | -5.55167988049339 | -2.44723912566841 | 4.72866986868038  |
| N | -1.79528566723513 | 3.71851917741475  | -4.83040634119925 |
| C | -1.14185189383330 | 3.60269829972933  | -6.03298800954401 |
| C | -2.27733507453746 | 4.99620891566138  | -4.68646126105527 |
| C | -0.51148346731173 | 2.47273108777128  | -6.56930205616785 |
| C | -1.18704437495968 | 4.85390339301989  | -6.71096417385144 |
| C | -3.00258350289206 | 5.53101410021855  | -3.61394172258518 |
| C | -1.92557516908410 | 5.76004748218816  | -5.83536078735951 |
| C | 0.08622080183925  | 2.61285697244880  | -7.82070719181864 |
| H | -0.49901728784908 | 1.53736115679861  | -6.02451027391545 |
| C | -0.58872071975734 | 4.97156579515405  | -7.95057443432457 |
| C | -3.38034003274379 | 6.86936763637576  | -3.70719182556564 |
| H | -3.25317578629952 | 4.91819250230570  | -2.75748672792058 |
| C | -2.31020995863344 | 7.08482753997679  | -5.90833580917037 |
| C | 0.05000319478401  | 3.83788602233500  | -8.50105478078721 |
| H | 0.58408783982568  | 1.76322696715188  | -8.27386258437693 |
| H | -0.60676759166817 | 5.90823558855553  | -8.49775882600233 |
| C | -3.04196516033916 | 7.63458507024164  | -4.83188873242944 |
| H | -3.94397968880027 | 7.32363567175062  | -2.90034835336413 |

|   |                   |                  |                   |
|---|-------------------|------------------|-------------------|
| H | -2.06312740177791 | 7.69610921317205 | -6.76995983043107 |
| H | 0.52164465715178  | 3.91997592808145 | -9.47444376617772 |
| H | -3.34940378852831 | 8.67371419783014 | -4.88037502675709 |

**XYZ Coordinates of Cz2i in T<sub>1</sub> optimized geometry**

|   |                   |                   |                   |
|---|-------------------|-------------------|-------------------|
| N | 0.12750809329195  | -0.16869724429367 | -0.61415539938422 |
| C | -1.09776049847645 | -0.72290674971535 | -0.20962738779111 |
| C | -2.25551399068371 | -0.48645471825996 | -1.08643437531157 |
| C | -2.15619495624546 | 0.48122608469921  | -2.10957549609192 |
| C | -0.90426419975165 | 1.07513107666720  | -2.42601094095113 |
| C | 0.31014387745053  | 0.71860927040028  | -1.68613280476272 |
| C | -3.53159603641833 | -1.10294139192017 | -0.84584481824949 |
| C | -0.81692469235623 | 2.05337950092305  | -3.42243995091786 |
| O | -1.14591924082344 | -1.37238339651323 | 0.83483080005794  |
| O | 1.42036949138651  | 1.17227360768897  | -1.96383214485192 |
| H | 0.14271463201034  | 2.52772830303418  | -3.59142668856333 |
| C | -3.31710835832489 | 0.88212620664098  | -2.86027619695633 |
| C | -3.21777564013943 | 1.84976694190183  | -3.88344762710476 |
| C | -4.37558024699888 | 2.08629987843092  | -4.76017561922441 |
| N | -5.60098342216620 | 1.53273911112547  | -4.35515614191853 |
| C | -5.78348613732551 | 0.64493235299013  | -3.28356354022266 |
| C | -4.56904839687254 | 0.28824796422762  | -2.54382015195593 |
| C | -4.65634808686121 | -0.69014468289188 | -1.54752876418114 |
| H | -5.61597553717187 | -1.16453763278062 | -1.37859955232883 |
| O | -6.89368568068042 | 0.19109610458795  | -3.00604167984298 |
| O | -4.32732603714230 | 2.73539256112240  | -5.80486187114456 |
| C | -1.94166303879937 | 2.46610194896697  | -4.12419191828177 |
| C | -6.75373597135381 | 1.85440471740893  | -5.20224106972756 |
| H | -7.64030482753126 | 1.43816809137012  | -4.73042502376973 |
| H | -6.83564029056687 | 2.93791598075773  | -5.30646177040334 |

|   |                   |                   |                   |
|---|-------------------|-------------------|-------------------|
| H | -6.61559811944330 | 1.42921042393869  | -6.19939006396103 |
| C | 1.28005468090447  | -0.49001278453364 | 0.23334847742925  |
| H | 1.36526696602793  | -1.57366347238006 | 0.33382750982131  |
| H | 2.16602315572106  | -0.06954515332381 | -0.23582723070371 |
| H | 1.13900824877558  | -0.06889245075227 | 1.23177950125314  |
| N | -3.67666403548564 | -2.17623036472107 | 0.05750412627385  |
| C | -2.98272732268280 | -3.39013401821530 | 0.00551423882548  |
| C | -4.60898924184714 | -2.23891649935427 | 1.09579732691056  |
| C | -2.01254263714687 | -3.80740089838464 | -0.90617884900018 |
| C | -3.46616296167242 | -4.23954114071926 | 1.02895190833028  |
| C | -5.50100539324506 | -1.25878514226476 | 1.53825786710961  |
| C | -4.50261170996771 | -3.50212086639905 | 1.73234743084632  |
| C | -1.49811847027994 | -5.09402449530032 | -0.75462124001002 |
| H | -1.66995615743439 | -3.15189475923040 | -1.69833954304984 |
| C | -2.94242493691596 | -5.52400668824581 | 1.16045755776915  |
| C | -6.31338276422744 | -1.57330712560006 | 2.62722634637477  |
| H | -5.55532633477994 | -0.29178633562939 | 1.05217723659515  |
| C | -5.32028319319855 | -3.79197042125773 | 2.82140848564439  |
| C | -1.95198541333088 | -5.94326533305368 | 0.26698170585622  |
| H | -0.73539345252603 | -5.44447695274676 | -1.44282793246090 |
| H | -3.30299764649911 | -6.18986234553675 | 1.93867681660540  |
| C | -6.22894815656004 | -2.82315451817084 | 3.26086559436822  |
| H | -7.02052400124415 | -0.83468931653631 | 2.99106207487828  |
| H | -5.24992260481942 | -4.75164582904953 | 3.32441556146405  |
| H | -1.53323776612161 | -6.94051138108501 | 0.35886022161383  |
| H | -6.87401903557264 | -3.03799786052452 | 4.10704350624888  |
| N | -1.79657907256304 | 3.53921025141162  | -5.02774768611566 |
| C | -0.86421935271054 | 3.60170869402160  | -6.06602415834923 |
| C | -2.49067534763944 | 4.75303438808515  | -4.97614259427193 |

|   |                   |                  |                   |
|---|-------------------|------------------|-------------------|
| C | 0.02792416085354  | 2.62155587053168 | -6.50817969434191 |
| C | -0.97069761773537 | 4.86473344230480 | -6.70291340032985 |
| C | -3.46100304440902 | 5.17041573151494 | -4.06465191680483 |
| C | -2.00727479731712 | 5.60222306597827 | -5.99977999562152 |
| C | 0.84032192316809  | 2.93587703771662 | -7.59719197630715 |
| H | 0.08232805497542  | 1.65469118681220 | -6.02184070248746 |
| C | -0.15300396228481 | 5.15438165384739 | -7.79201310898146 |
| C | -3.97558959164031 | 6.45692885327435 | -4.21660790360414 |
| H | -3.80357966411523 | 4.51507975126541 | -3.27234383339934 |
| C | -2.53117092403247 | 6.88658493385895 | -6.13167653488377 |
| C | 0.75578636604300  | 4.18554729697937 | -8.23116826976763 |
| H | 1.54756089330205  | 2.19723799476226 | -7.96079552515779 |
| H | -0.22344952273234 | 6.11391446042514 | -8.29528080712275 |
| C | -3.52174357543390 | 7.30595452295797 | -5.23839997151581 |
| H | -4.73842465050741 | 6.80746423694396 | -3.52856498587322 |
| H | -2.17062622323694 | 7.55227287284573 | -6.91005260060186 |
| H | 1.40087464720829  | 4.40023321074843 | -9.07737316418339 |
| H | -3.94061920306981 | 8.30311838622162 | -5.33058867143172 |

**XYZ Coordinates of *o*Cz1 in S<sub>0</sub> optimized geometry**

|   |           |           |           |
|---|-----------|-----------|-----------|
| N | 0.413476  | -0.777006 | -3.949969 |
| C | -0.563163 | -0.960780 | -2.958027 |
| C | -1.908374 | -0.372560 | -3.221067 |
| C | -2.094403 | 0.449705  | -4.365289 |
| C | -1.076657 | 0.585898  | -5.340589 |
| C | 0.233450  | -0.083113 | -5.149218 |
| C | -2.983079 | -0.612529 | -2.360815 |
| C | -1.301800 | 1.319143  | -6.495076 |
| O | -0.298853 | -1.553002 | -1.921799 |
| O | 1.135040  | -0.021969 | -5.973505 |

|   |           |           |           |
|---|-----------|-----------|-----------|
| H | -0.501880 | 1.387077  | -7.224104 |
| C | -3.346897 | 1.078178  | -4.596140 |
| C | -3.556043 | 1.826932  | -5.777962 |
| C | -4.876121 | 2.460121  | -6.039557 |
| N | -5.864940 | 2.277970  | -5.058272 |
| C | -5.707191 | 1.542576  | -3.875740 |
| C | -4.380776 | 0.921185  | -3.647039 |
| C | -4.192826 | 0.095781  | -2.557914 |
| H | -5.025062 | -0.064963 | -1.883047 |
| O | -6.640092 | 1.424188  | -3.093307 |
| O | -5.097517 | 3.103310  | -7.055851 |
| C | -2.541826 | 1.944349  | -6.714946 |
| H | -2.730550 | 2.515847  | -7.616936 |
| C | -7.194848 | 2.857116  | -5.280389 |
| H | -7.937991 | 2.057896  | -5.328041 |
| H | -7.452323 | 3.513283  | -4.446895 |
| H | -7.169395 | 3.412168  | -6.214497 |
| C | 1.741604  | -1.366196 | -3.747982 |
| H | 1.737334  | -1.888790 | -2.795476 |
| H | 1.955899  | -2.054938 | -4.565858 |
| H | 2.496850  | -0.577264 | -3.750525 |
| C | -3.013531 | -1.731599 | -1.369675 |
| C | -3.251553 | -3.037648 | -1.853004 |
| C | -2.910682 | -1.530943 | 0.007244  |
| N | -3.401569 | -3.252274 | -3.264523 |
| C | -3.342233 | -4.112277 | -0.970890 |
| C | -3.001101 | -2.609387 | 0.889223  |
| H | -2.734894 | -0.528463 | 0.384537  |
| C | -2.313463 | -3.427464 | -4.134506 |

|   |           |           |           |
|---|-----------|-----------|-----------|
| C | -4.453244 | -2.695992 | -4.004215 |
| C | -3.208467 | -3.900442 | 0.402825  |
| H | -3.527980 | -5.103052 | -1.372806 |
| H | -2.906201 | -2.439023 | 1.957329  |
| C | -2.671488 | -2.977716 | -5.430887 |
| C | -1.049510 | -3.947636 | -3.854999 |
| C | -4.036301 | -2.498034 | -5.344885 |
| C | -5.731755 | -2.342190 | -3.569130 |
| H | -3.278238 | -4.739231 | 1.088389  |
| C | -1.727429 | -3.034417 | -6.463041 |
| C | -0.132748 | -4.006131 | -4.902833 |
| H | -0.787007 | -4.257277 | -2.849921 |
| C | -4.912212 | -1.893291 | -6.253432 |
| C | -6.584962 | -1.738288 | -4.490067 |
| H | -6.033278 | -2.505032 | -2.539791 |
| C | -0.461387 | -3.548628 | -6.192212 |
| H | -1.979133 | -2.677783 | -7.457493 |
| H | 0.859287  | -4.405830 | -4.715603 |
| C | -6.177692 | -1.505135 | -5.816538 |
| H | -4.602595 | -1.716627 | -7.279461 |
| H | -7.572725 | -1.423071 | -4.169920 |
| H | 0.282084  | -3.593948 | -6.981607 |
| H | -6.862271 | -1.025126 | -6.509228 |

**XYZ Coordinates of *o*Cz1 in S<sub>1</sub> optimized geometry**

|   |                   |                   |                   |
|---|-------------------|-------------------|-------------------|
| N | 0.00335030260052  | -0.56816792163487 | -4.43725620382003 |
| C | -0.89307025436908 | -0.83930101802418 | -3.39503813867701 |
| C | -2.18094953041308 | -0.15136778806819 | -3.43777573769423 |
| C | -2.40690037185682 | 0.84114320771744  | -4.42980663702814 |
| C | -1.45950791842919 | 1.09207349792993  | -5.45447032707082 |

|   |                   |                   |                   |
|---|-------------------|-------------------|-------------------|
| C | -0.21510132705453 | 0.33327051050875  | -5.50128768833679 |
| C | -3.19189780571098 | -0.41760548844077 | -2.46580383737766 |
| C | -1.71904276163002 | 2.06199120797226  | -6.44252138635289 |
| O | -0.58302255484508 | -1.64047992034601 | -2.49808118532090 |
| O | 0.63483797072883  | 0.43900899967030  | -6.38738087657496 |
| H | -0.96603212035866 | 2.21659331524810  | -7.20716124833557 |
| C | -3.62206326909608 | 1.59951966310092  | -4.42059089590799 |
| C | -3.85705678856868 | 2.56976543591122  | -5.42310990912764 |
| C | -5.10129877044183 | 3.34640619246190  | -5.42305616104274 |
| N | -6.01054666750593 | 3.06812051533227  | -4.37748571019813 |
| C | -5.83096530586785 | 2.10903506228024  | -3.37145477041933 |
| C | -4.57084281507321 | 1.36394824302665  | -3.39801364432455 |
| C | -4.33474309812556 | 0.37271436993469  | -2.43483265715797 |
| H | -5.11596228568319 | 0.19027328580702  | -1.70396957922173 |
| O | -6.71470808679500 | 1.92149747803287  | -2.52976127574694 |
| O | -5.36544612557623 | 4.19416771642941  | -6.27634259122386 |
| C | -2.89703067051117 | 2.79091112937232  | -6.42826999786860 |
| H | -3.10876745142867 | 3.54360384031918  | -7.17907100079052 |
| C | -7.26848820796111 | 3.81521210258084  | -4.32997958927642 |
| H | -8.11352471939186 | 3.13397142037481  | -4.46004866892580 |
| H | -7.37330836552595 | 4.29439490126179  | -3.35430248201147 |
| H | -7.24882284558177 | 4.55470716449165  | -5.12665268780700 |
| C | 1.28802460653616  | -1.26928289729681 | -4.45161898320899 |
| H | 1.41723879739908  | -1.75855051161999 | -3.48959772937887 |
| H | 1.30425632513980  | -2.01023831693456 | -5.25638734979341 |
| H | 2.08767624890453  | -0.55246883690711 | -4.64134273558400 |
| C | -3.17500730891630 | -1.58749221822441 | -1.54026585466596 |
| C | -3.13266278842718 | -2.92858843944372 | -1.97856121750770 |
| C | -3.29333190142181 | -1.38830532189474 | -0.15883493130683 |



|   |                   |                   |                   |
|---|-------------------|-------------------|-------------------|
| N | -3.03544759997196 | -3.24402945514052 | -3.37587948124502 |
| C | -3.15609151908989 | -4.00513076144662 | -1.08733545590346 |
| C | -3.33475179442209 | -2.45359768317532 | 0.74016731274672  |
| H | -3.33093177911178 | -0.36686680937607 | 0.20421176476695  |
| C | -1.98133681672484 | -3.93298465316330 | -3.95664945702009 |
| C | -3.95375651848999 | -2.90080585123433 | -4.36083500628917 |
| C | -3.26045443779183 | -3.76936149801632 | 0.28033526940434  |
| H | -3.12356326289054 | -5.01745944031823 | -1.47724921670687 |
| H | -3.41830902013720 | -2.25400635325256 | 1.80403879941152  |
| C | -2.20692919018123 | -4.02973094667579 | -5.35663759151106 |
| C | -0.82242301298626 | -4.43221828679055 | -3.34545332453202 |
| C | -3.47599545031483 | -3.35957442571078 | -5.61726120705684 |
| C | -5.19090726400549 | -2.25973203193094 | -4.22097848195645 |
| H | -3.29503796601513 | -4.60300365989436 | 0.97368579360751  |
| C | -1.26788400626280 | -4.65793645887799 | -6.15621119095095 |
| C | 0.09926343300740  | -5.07892765805334 | -4.16399160059647 |
| H | -0.64117965301716 | -4.26420496848721 | -2.29303493673631 |
| C | -4.22630438394107 | -3.13166981061614 | -6.75790311603255 |
| C | -5.93051141515741 | -2.03616372221909 | -5.37959364772617 |
| H | -5.54022410486900 | -1.92657346489871 | -3.25399175904027 |
| C | -0.11622276761400 | -5.19314413232465 | -5.54566263866945 |
| H | -1.40579115045084 | -4.73053434418541 | -7.22965650368612 |
| H | 1.01019052328535  | -5.47531422523900 | -3.72998162974289 |
| C | -5.45533416926958 | -2.45493640721523 | -6.63007922178875 |
| H | -3.88022841318221 | -3.46428637956002 | -7.73073627741055 |
| H | -6.88100733331270 | -1.52022042873765 | -5.30986780946690 |
| H | 0.62787854395016  | -5.68630865151013 | -6.16204510928017 |
| H | -6.04522360577494 | -2.25610007287886 | -7.51822258750263 |

**XYZ Coordinates of *o*Cz1 in T<sub>1</sub> optimized geometry**

|   |                   |                   |                   |
|---|-------------------|-------------------|-------------------|
| N | 0.23683017445173  | -0.78819347638495 | -4.00232349702349 |
| C | -0.66820736061170 | -0.88453833753944 | -2.93069492313742 |
| C | -1.98189047370558 | -0.27386217413510 | -3.12785475706680 |
| C | -2.26141942570114 | 0.42696181692409  | -4.32393926761202 |
| C | -1.35705673365690 | 0.40637837597831  | -5.40637368801836 |
| C | -0.05101350902363 | -0.24214678276157 | -5.25842396781001 |
| C | -3.02393011816383 | -0.41271403745077 | -2.13014670615494 |
| C | -1.71339436740023 | 0.99329837285639  | -6.65045951984235 |
| O | -0.35318376099914 | -1.46859978908820 | -1.88851933671751 |
| O | 0.77883789987163  | -0.29888755773516 | -6.16640263863928 |
| H | -0.99019477256147 | 0.94357221952056  | -7.45648081835672 |
| C | -3.51622074518553 | 1.09730953166282  | -4.47894697465982 |
| C | -3.85683032512706 | 1.65462173976215  | -5.71995057687450 |
| C | -5.17240734834369 | 2.28158880310301  | -5.91711487659056 |
| N | -6.01400633098678 | 2.33305353960306  | -4.79270319578790 |
| C | -5.72835888045692 | 1.77141105610723  | -3.53895977148636 |
| C | -4.41635763092091 | 1.14070399166861  | -3.38443669494853 |
| C | -4.15092332256737 | 0.37276839108112  | -2.22040882319902 |
| H | -4.94868728918057 | 0.28199668375473  | -1.49113666603159 |
| O | -6.57213013952945 | 1.79842895551119  | -2.64148118866999 |
| O | -5.52922253108026 | 2.73257763601804  | -7.00472496528777 |
| C | -2.94114012734469 | 1.58906759426608  | -6.81156657563090 |
| H | -3.24535314405369 | 2.03059273107060  | -7.75353911810384 |
| C | -7.33958490663358 | 2.94140699767733  | -4.93660062181809 |
| H | -8.11502416920787 | 2.17553891586102  | -4.84741084501851 |
| H | -7.49241426143865 | 3.67062333542959  | -4.13940231378072 |
| H | -7.38897058129424 | 3.41422441891394  | -5.91428455280186 |
| C | 1.58274978204293  | -1.34603548183710 | -3.84164601832122 |
| H | 1.64621866161243  | -1.78839029849266 | -2.85101450938029 |

|   |                   |                   |                   |
|---|-------------------|-------------------|-------------------|
| H | 1.75874626497958  | -2.09679027779175 | -4.61229472890246 |
| H | 2.32411645878472  | -0.55182422461548 | -3.95800468402803 |
| C | -3.07467511371727 | -1.61467950313093 | -1.25991782774570 |
| C | -3.15617929814822 | -2.86987652182592 | -1.90365082728325 |
| C | -3.13809714779557 | -1.57963764216370 | 0.13487412482859  |
| N | -3.15919393916884 | -2.91175967790191 | -3.33764137066858 |
| C | -3.22242045519897 | -4.05496613701176 | -1.17289841442728 |
| C | -3.21502769607762 | -2.76294267092299 | 0.86985059024929  |
| H | -3.09071073835161 | -0.61944382119183 | 0.63829324833954  |
| C | -2.10150089142228 | -3.36693644102951 | -4.12856322067964 |
| C | -4.14271403216417 | -2.37386696474803 | -4.17525034883222 |
| C | -3.24480670475129 | -4.00020559070859 | 0.22111170999634  |
| H | -3.27943200499363 | -5.00245265533681 | -1.69925574363201 |
| H | -3.24081553206699 | -2.72016340223060 | 1.95442623848707  |
| C | -2.37090479398402 | -3.04494859715133 | -5.48587062834824 |
| C | -0.91463574788219 | -3.98367245583890 | -3.72567802019826 |
| C | -3.67222746006545 | -2.40053986673291 | -5.51333191035805 |
| C | -5.39702421899971 | -1.85917898349870 | -3.84213537798973 |
| H | -3.30219911348256 | -4.91881922701099 | 0.79617688665367  |
| C | -1.41777861073693 | -3.34284997702221 | -6.45981306944369 |
| C | 0.01028141395842  | -4.28752297285226 | -4.72143541438981 |
| H | -0.71491275285851 | -4.17384090095695 | -2.67835758090136 |
| C | -4.44670562832513 | -1.83159401285516 | -6.52208586723556 |
| C | -6.16196653844833 | -1.30431819983216 | -4.87252948749793 |
| H | -5.75216968476387 | -1.87509669302293 | -2.81872661315664 |
| C | -0.23144317124343 | -3.96697324872835 | -6.06949019326911 |
| H | -1.58953632154865 | -3.08163749546586 | -7.49908261252614 |
| H | 0.94557647944827  | -4.76489384700878 | -4.44704124704227 |
| C | -5.68746794513881 | -1.27032274058289 | -6.19045677370289 |

|   |                   |                   |                   |
|---|-------------------|-------------------|-------------------|
| H | -4.08759468893321 | -1.80831201172682 | -7.54590956493732 |
| H | -7.12872479886635 | -0.87264899153549 | -4.63464826822341 |
| H | 0.52126838109698  | -4.19855427327502 | -6.81587963448814 |
| H | -6.28907023193784 | -0.80582914563727 | -6.96478795987606 |

**XYZ Coordinates of *mCz1* in  $S_0$  optimized geometry**

|   |           |           |           |
|---|-----------|-----------|-----------|
| N | -0.584446 | 2.007721  | 0.527472  |
| C | -1.628212 | 1.076634  | 0.636266  |
| C | -2.250786 | 0.591016  | -0.630576 |
| C | -1.995890 | 1.333234  | -1.818305 |
| C | -1.034208 | 2.375962  | -1.848317 |
| C | -0.247253 | 2.713113  | -0.634935 |
| C | -3.134056 | -0.499507 | -0.662317 |
| C | -0.795141 | 3.082665  | -3.017396 |
| O | -1.985250 | 0.712497  | 1.747294  |
| O | 0.632616  | 3.561732  | -0.639454 |
| H | -0.043235 | 3.863823  | -2.999678 |
| C | -2.697066 | 1.028560  | -3.016556 |
| C | -2.448065 | 1.771313  | -4.194131 |
| C | -3.194935 | 1.458202  | -5.440576 |
| N | -4.127647 | 0.412301  | -5.381196 |
| C | -4.409919 | -0.358238 | -4.242587 |
| C | -3.640037 | -0.024402 | -3.012149 |
| C | -3.830835 | -0.771672 | -1.868929 |
| H | -4.521134 | -1.606696 | -1.911341 |
| O | -5.243084 | -1.252101 | -4.263199 |
| O | -3.022604 | 2.072189  | -6.483084 |
| C | -1.507122 | 2.787673  | -4.192794 |
| H | -1.332914 | 3.338332  | -5.110502 |
| C | -4.851841 | 0.124653  | -6.626374 |

|   |           |           |           |
|---|-----------|-----------|-----------|
| H | -5.521822 | -0.710746 | -6.440868 |
| H | -5.414369 | 1.007806  | -6.936006 |
| H | -4.137787 | -0.120057 | -7.415053 |
| C | 0.101786  | 2.347687  | 1.781639  |
| H | 0.481846  | 1.433043  | 2.241044  |
| H | 0.916831  | 3.026085  | 1.543305  |
| H | -0.598024 | 2.818646  | 2.475186  |
| C | -3.345941 | -1.452176 | 0.459948  |
| C | -4.642055 | -1.838538 | 0.829577  |
| C | -2.251293 | -2.054869 | 1.091703  |
| C | -4.833559 | -2.786083 | 1.836402  |
| H | -5.499335 | -1.381139 | 0.345304  |
| C | -2.443027 | -2.985814 | 2.111521  |
| H | -1.240261 | -1.794249 | 0.800949  |
| C | -3.742068 | -3.355719 | 2.487569  |
| H | -5.841114 | -3.066951 | 2.126865  |
| N | -1.318800 | -3.541246 | 2.770209  |
| H | -3.879856 | -4.072335 | 3.290111  |
| C | -0.291600 | -2.808030 | 3.379030  |
| C | -1.037421 | -4.903774 | 2.912796  |
| C | 0.660851  | -3.712588 | 3.912425  |
| C | -0.162723 | -1.424230 | 3.529291  |
| C | 0.186131  | -5.047790 | 3.616310  |
| C | -1.752068 | -6.010768 | 2.448136  |
| C | 1.782306  | -3.214072 | 4.585842  |
| C | 0.962222  | -0.957118 | 4.207370  |
| H | -0.909252 | -0.739191 | 3.144493  |
| C | 0.686208  | -6.328970 | 3.873825  |
| C | -1.231640 | -7.275472 | 2.717416  |

|   |           |           |          |
|---|-----------|-----------|----------|
| H | -2.675671 | -5.889036 | 1.892772 |
| C | 1.930331  | -1.836824 | 4.725126 |
| H | 2.520822  | -3.895768 | 4.998102 |
| H | 1.084586  | 0.113414  | 4.348217 |
| C | -0.027994 | -7.437466 | 3.426196 |
| H | 1.621128  | -6.452553 | 4.413028 |
| H | -1.768575 | -8.152995 | 2.369237 |
| H | 2.794841  | -1.436663 | 5.246086 |
| H | 0.348187  | -8.437123 | 3.620952 |

**XYZ Coordinates of *mCz1* in  $S_1$  optimized geometry**

|   |                   |                   |                   |
|---|-------------------|-------------------|-------------------|
| N | -0.72908851964428 | 2.21830861597291  | 0.52893108009959  |
| C | -1.52779753791349 | 1.07511122543799  | 0.59482129655250  |
| C | -2.18418557443297 | 0.63667676557647  | -0.63376453016377 |
| C | -2.01274611393285 | 1.42128395505031  | -1.81335950333309 |
| C | -1.19153662077722 | 2.57786815402178  | -1.82788371754395 |
| C | -0.49734696113607 | 3.00906275418539  | -0.62289312150566 |
| C | -3.01886448707442 | -0.52374915804179 | -0.68932905655812 |
| C | -1.03033464723444 | 3.33025441602127  | -3.00948846302396 |
| O | -1.63125667069227 | 0.49999794980377  | 1.69699335586428  |
| O | 0.24602205397935  | 3.99035274342645  | -0.56329047763072 |
| H | -0.38909829658293 | 4.20310689359666  | -2.96725010415918 |
| C | -2.68013695509550 | 1.04966675700019  | -3.02777269806722 |
| C | -2.50218480727797 | 1.82625271250575  | -4.19913458066169 |
| C | -3.18210337242375 | 1.44769388460067  | -5.43952297346643 |
| N | -4.00197989729560 | 0.30508136381316  | -5.38888457973333 |
| C | -4.21522543018828 | -0.50045598337584 | -4.25645610164721 |
| C | -3.51254411558723 | -0.09164427556683 | -3.03927202173641 |
| C | -3.66439399614814 | -0.85561100133246 | -1.87033075089117 |
| H | -4.29479860087163 | -1.73584845565898 | -1.92769107526271 |

|   |                   |                   |                   |
|---|-------------------|-------------------|-------------------|
| O | -4.95281205115623 | -1.49027849613160 | -4.30531170920435 |
| O | -3.07076739473655 | 2.06954745130138  | -6.49804173393898 |
| C | -1.67439846080532 | 2.96175832520177  | -4.17733665018375 |
| H | -1.56280555838076 | 3.52973306010283  | -5.09391850435393 |
| C | -4.67630913090771 | -0.04922581519625 | -6.63798002125982 |
| H | -5.26660937969652 | -0.94420690936401 | -6.45724933819512 |
| H | -5.31397703884634 | 0.77708369877262  | -6.96118443618100 |
| H | -3.93524270598838 | -0.22406446962333 | -7.42150943974598 |
| C | -0.08648920893104 | 2.62708803935071  | 1.77654761568634  |
| H | 0.64241970530536  | 1.87321665727598  | 2.09020180260414  |
| H | 0.41460966669595  | 3.57468415226650  | 1.59460370442956  |
| H | -0.83607328723466 | 2.72249384283365  | 2.56438113382430  |
| C | -3.23736867911658 | -1.44476509497507 | 0.46826520785658  |
| C | -4.52764641960977 | -1.70968024546443 | 0.93832844747556  |
| C | -2.16818642221865 | -2.12348462702272 | 1.06234757799553  |
| C | -4.75541933549157 | -2.61033755121981 | 1.98546175801490  |
| H | -5.36436989758678 | -1.19274045441789 | 0.48064421177631  |
| C | -2.40063041668974 | -2.99332074339333 | 2.12012123257606  |
| H | -1.15887458420814 | -1.94742844166424 | 0.71200675969989  |
| C | -3.68986749133341 | -3.25810600163777 | 2.59849921286406  |
| H | -5.76676992299735 | -2.78784400864726 | 2.33655183437123  |
| N | -1.27317872045322 | -3.60876542919750 | 2.76761738957960  |
| H | -3.83838761630367 | -3.92215191630016 | 3.44322299372538  |
| C | -0.21579360664933 | -2.92554610574458 | 3.33109221172042  |
| C | -1.08903490707993 | -4.97545744004661 | 2.94184497434627  |
| C | 0.69394307659329  | -3.86924322055249 | 3.89508093410090  |
| C | -0.01516805404406 | -1.53300553299364 | 3.39788066183867  |
| C | 0.12715684323307  | -5.19021137347787 | 3.64399706333729  |
| C | -1.89728599862355 | -6.02682573948102 | 2.49663218867931  |

|   |                   |                   |                  |
|---|-------------------|-------------------|------------------|
| C | 1.83413823799346  | -3.41256631042201 | 4.52775868079941 |
| C | 1.14676557632061  | -1.10479542231138 | 4.03619089932354 |
| H | -0.71198821805968 | -0.82642888492660 | 2.95564501328810 |
| C | 0.53043448287615  | -6.48530462371853 | 3.92310906055482 |
| C | -1.47421261085972 | -7.32419265333736 | 2.79175156215843 |
| H | -2.80751708704184 | -5.83345538131992 | 1.94297559671219 |
| C | 2.05524326932504  | -2.01829500850521 | 4.59023063746216 |
| H | 2.54574397651107  | -4.10134606880360 | 4.97046259175934 |
| H | 1.34717605099580  | -0.04194769384435 | 4.10251058739579 |
| C | -0.28461828135478 | -7.55197465056564 | 3.49486014788473 |
| H | 1.45602751821930  | -6.68071544324952 | 4.45424481762639 |
| H | -2.07388754137353 | -8.16622304951523 | 2.46532932424661 |
| H | 2.94897196275918  | -1.64943012544684 | 5.08185743326421 |
| H | 0.02141721128031  | -8.57031761162450 | 3.70854558695317 |

**XYZ Coordinates of *m*Cz1 in T<sub>1</sub> optimized geometry**

|   |                   |                   |                   |
|---|-------------------|-------------------|-------------------|
| N | -0.56984120647764 | 1.98830970621284  | 0.50576872845844  |
| C | -1.59618191261781 | 1.03936160293920  | 0.60698284258315  |
| C | -2.21212574709978 | 0.57291828934469  | -0.64045952622794 |
| C | -1.94687557548185 | 1.29805582449466  | -1.82958558556893 |
| C | -0.96789757427309 | 2.32106468609373  | -1.86772816422907 |
| C | -0.20268078413518 | 2.66611957258623  | -0.66572687924715 |
| C | -3.17571104972150 | -0.52824892849520 | -0.66964769868984 |
| C | -0.71038974545591 | 3.03766579084558  | -3.06983088778084 |
| O | -1.93321893489438 | 0.64452413776979  | 1.72853859343548  |
| O | 0.69256889217931  | 3.51066881157708  | -0.66749511182254 |
| H | 0.05483711786089  | 3.80447299107357  | -3.04378816064872 |
| C | -2.68183394337172 | 1.01548676282170  | -3.02667718714250 |
| C | -2.42428355346201 | 1.74431809998066  | -4.19605182181541 |
| C | -3.19062673006635 | 1.47067129821845  | -5.42016915032817 |



|   |                   |                   |                   |
|---|-------------------|-------------------|-------------------|
| N | -4.16402707198330 | 0.46456802299576  | -5.35050021476961 |
| C | -4.46143382540375 | -0.29849096383435 | -4.20823622217583 |
| C | -3.67993408176152 | 0.00851514049675  | -3.00408876995807 |
| C | -3.89055055036834 | -0.74871112196019 | -1.83319611327908 |
| H | -4.59771627477482 | -1.56782541699193 | -1.89723023235196 |
| O | -5.32992822638602 | -1.17095995024463 | -4.22568032811126 |
| O | -3.00515981017686 | 2.08318292152729  | -6.47049253549989 |
| C | -1.42120335803078 | 2.75929524432667  | -4.20980380203257 |
| H | -1.25283687437993 | 3.29219434743085  | -5.13848696556898 |
| C | -4.91279084140664 | 0.20771573708779  | -6.58521064187380 |
| H | -5.62420229762803 | -0.58979108028049 | -6.38644309601609 |
| H | -5.42946325375841 | 1.11784510637920  | -6.89747079187749 |
| H | -4.22176125322829 | -0.07971683440419 | -7.38057424046851 |
| C | 0.09832556917441  | 2.34695115579057  | 1.76133895083633  |
| H | 0.52901212693918  | 1.45001397754602  | 2.21240159979464  |
| H | 0.87624469594762  | 3.06990760639488  | 1.52928241978095  |
| H | -0.62537362537565 | 2.76989153605954  | 2.46124050667810  |
| C | -3.35742601888475 | -1.48441454191182 | 0.44125318407188  |
| C | -4.64894829512299 | -1.91210014451028 | 0.80627708419605  |
| C | -2.25415870564668 | -2.06016301208783 | 1.08790219988666  |
| C | -4.83012592543662 | -2.87323167565170 | 1.80009345804884  |
| H | -5.51136243869614 | -1.46382809759181 | 0.32382310118976  |
| C | -2.43816129251703 | -3.00964749385828 | 2.08897871546924  |
| H | -1.24780383763180 | -1.77113889910598 | 0.81141767447336  |
| C | -3.73076204205608 | -3.42414795557253 | 2.45343358442384  |
| H | -5.83328918216634 | -3.17777759255376 | 2.08090396280708  |
| N | -1.31349612811809 | -3.54319581332009 | 2.76662129528438  |
| H | -3.85577742936511 | -4.14192958061337 | 3.25686782482485  |
| C | -0.30331129551700 | -2.79485286942861 | 3.38227757272477  |

|   |                   |                   |                  |
|---|-------------------|-------------------|------------------|
| C | -1.02101632115134 | -4.90090909499952 | 2.91638075127708 |
| C | 0.65072889447786  | -3.68677787653496 | 3.93624807987724 |
| C | -0.19752766543387 | -1.40707059438112 | 3.52386898222716 |
| C | 0.19222395732710  | -5.03144166098492 | 3.64111870939429 |
| C | -1.71796581896287 | -6.01322428959646 | 2.43517129012270 |
| C | 1.75244495747018  | -3.17397014692079 | 4.62172331655193 |
| C | 0.91543266115843  | -0.92333992577277 | 4.21250324674322 |
| H | -0.94268243993086 | -0.73166617165829 | 3.11895262349530 |
| C | 0.69624333383430  | -6.30384482362817 | 3.91203527958043 |
| C | -1.19506496055365 | -7.27374061887953 | 2.72124838097219 |
| H | -2.62561936992331 | -5.89812077924082 | 1.85365566803686 |
| C | 1.88183945690162  | -1.78881185572591 | 4.75079132676357 |
| H | 2.49297660137670  | -3.84153162637002 | 5.05219624234476 |
| H | 1.02676082020438  | 0.14903278733624  | 4.34212377087485 |
| C | -0.00570544130463 | -7.42120077439179 | 3.45404199253095 |
| H | 1.62285803487793  | -6.42178965235963 | 4.46585805569367 |
| H | -1.71587721286404 | -8.15655297708036 | 2.36370420652861 |
| H | 2.73429688752505  | -1.37672878447850 | 5.28173589694391 |
| H | 0.37609291574790  | -8.41652553190906 | 3.65850400855773 |

**XYZ Coordinates of *p*Cz1 in  $S_0$  optimized geometry**

|   |           |          |           |
|---|-----------|----------|-----------|
| N | -1.911438 | 5.851155 | 3.025816  |
| C | -2.855005 | 4.808893 | 3.034469  |
| C | -3.533477 | 4.481617 | 1.744346  |
| C | -3.320421 | 5.350788 | 0.634926  |
| C | -2.388153 | 6.418302 | 0.696346  |
| C | -1.614702 | 6.677868 | 1.936484  |
| C | -4.424213 | 3.402710 | 1.624995  |
| C | -2.179357 | 7.238924 | -0.402355 |
| O | -3.084936 | 4.233480 | 4.087226  |

|   |           |          |           |
|---|-----------|----------|-----------|
| O | -0.778781 | 7.567567 | 2.011525  |
| H | -1.452392 | 8.038574 | -0.313131 |
| C | -4.038561 | 5.157162 | -0.577266 |
| C | -3.815262 | 6.008452 | -1.684980 |
| C | -4.565846 | 5.804846 | -2.954692 |
| N | -5.498079 | 4.753544 | -2.972230 |
| C | -5.758246 | 3.886460 | -1.903491 |
| C | -4.977248 | 4.103945 | -0.657157 |
| C | -5.152509 | 3.255756 | 0.414376  |
| H | -5.850217 | 2.432535 | 0.307858  |
| O | -6.591250 | 2.998648 | -2.014557 |
| O | -4.385739 | 6.513624 | -3.933810 |
| C | -2.891819 | 7.037373 | -1.596235 |
| H | -2.735754 | 7.674796 | -2.459286 |
| C | -6.272843 | 4.515376 | -4.197112 |
| H | -6.078766 | 3.504753 | -4.561899 |
| H | -7.338924 | 4.600978 | -3.977626 |
| H | -5.971588 | 5.254167 | -4.935112 |
| C | -1.240619 | 6.111402 | 4.306705  |
| H | -0.762495 | 5.196152 | 4.660019  |
| H | -0.504667 | 6.894922 | 4.146647  |
| H | -1.975821 | 6.421344 | 5.052451  |
| C | -4.635740 | 2.336514 | 2.639286  |
| C | -5.936181 | 1.977915 | 3.021132  |
| C | -3.560080 | 1.583242 | 3.135182  |
| C | -6.159373 | 0.916106 | 3.894581  |
| H | -6.780968 | 2.553071 | 2.653912  |
| C | -3.775782 | 0.503256 | 3.979012  |
| H | -2.548575 | 1.837723 | 2.838294  |

|   |           |           |          |
|---|-----------|-----------|----------|
| C | -5.079792 | 0.164329  | 4.370771 |
| H | -7.165325 | 0.668112  | 4.215003 |
| H | -2.942956 | -0.095739 | 4.330717 |
| N | -5.299235 | -0.937696 | 5.229775 |
| C | -6.163186 | -2.011679 | 4.978283 |
| C | -4.649703 | -1.167699 | 6.449391 |
| C | -6.067940 | -2.936628 | 6.049005 |
| C | -6.983980 | -2.252339 | 3.873347 |
| C | -5.105846 | -2.398031 | 6.986887 |
| C | -3.730062 | -0.365349 | 7.130007 |
| C | -6.829263 | -4.110035 | 6.018075 |
| C | -7.730917 | -3.429245 | 3.866154 |
| H | -7.032172 | -1.553390 | 3.045916 |
| C | -4.610339 | -2.839602 | 8.218589 |
| C | -3.251691 | -0.828312 | 8.354685 |
| H | -3.407068 | 0.586947  | 6.724080 |
| C | -7.661029 | -4.348921 | 4.927157 |
| H | -6.764649 | -4.825432 | 6.832968 |
| H | -8.377562 | -3.638819 | 3.019134 |
| C | -3.680866 | -2.053627 | 8.894695 |
| H | -4.952178 | -3.780545 | 8.640329 |
| H | -2.534847 | -0.224530 | 8.903350 |
| H | -8.257659 | -5.255208 | 4.890459 |
| H | -3.286567 | -2.384815 | 9.850507 |

**XYZ Coordinates of *p*Cz1 in S<sub>1</sub> optimized geometry**

|   |                   |                  |                  |
|---|-------------------|------------------|------------------|
| N | -2.28532424283959 | 5.58953049533781 | 3.22215275756415 |
| C | -3.03465688251426 | 4.43212459303001 | 2.98897936464069 |
| C | -3.62029384815956 | 4.27774817902555 | 1.65958548824545 |
| C | -3.42602897115015 | 5.30011804608435 | 0.69068092161094 |

|   |                   |                  |                   |
|---|-------------------|------------------|-------------------|
| C | -2.66580784755483 | 6.46079453098674 | 0.98226552310335  |
| C | -2.05593000038762 | 6.63501525353919 | 2.29453356087324  |
| C | -4.38974529023611 | 3.13044389812961 | 1.31677079678224  |
| C | -2.49068492871638 | 7.46039095509041 | 0.00247778960430  |
| O | -3.16037507897145 | 3.60419496447087 | 3.90780826099611  |
| O | -1.37829587025785 | 7.61444194279627 | 2.61470835425049  |
| H | -1.90056249256270 | 8.32967811118774 | 0.26909351329311  |
| C | -4.00853043014371 | 5.16747279818730 | -0.61283158064856 |
| C | -3.81837076864002 | 6.18930646707509 | -1.57654804065990 |
| C | -4.41069029046352 | 6.06788546646197 | -2.90888874012624 |
| N | -5.15709182705846 | 4.89301638986426 | -3.15252203891473 |
| C | -5.37569993678724 | 3.85577137477446 | -2.23445069054153 |
| C | -4.76818248230683 | 4.01515815700303 | -0.91576164487514 |
| C | -4.94643737451648 | 3.01265131899179 | 0.05484974227499  |
| H | -5.53451556471669 | 2.14462210588264 | -0.22155014050229 |
| O | -6.05284391000821 | 2.87429289001124 | -2.56198201792462 |
| O | -4.28297338132614 | 6.92469363951151 | -3.78721739453306 |
| C | -3.05674230420759 | 7.32873335463810 | -1.25322845840362 |
| H | -2.93165531894912 | 8.08947716100648 | -2.01524702395830 |
| C | -5.76969585969310 | 4.71789465708303 | -4.46883338828520 |
| H | -5.39263888046210 | 3.80391796948249 | -4.93430654506241 |
| H | -6.85257878698800 | 4.61594501449320 | -4.36354724399458 |
| H | -5.52092509559581 | 5.58844709294763 | -5.07084814899596 |
| C | -1.70572152643113 | 5.71538042695109 | 4.55823292588443  |
| H | -1.04553345898877 | 4.86780535121227 | 4.75859098430603  |
| H | -1.15263359961150 | 6.65087981332925 | 4.59214512708702  |
| H | -2.49825143398785 | 5.70757082563630 | 5.31081448621822  |
| C | -4.63191278016399 | 2.02593357738542 | 2.29584832335927  |
| C | -5.85210942005374 | 1.94190350250786 | 2.97648151892316  |

|   |                   |                   |                  |
|---|-------------------|-------------------|------------------|
| C | -3.66844606272203 | 1.02840115630406  | 2.50490333330965 |
| C | -6.09299340259255 | 0.92386199213819  | 3.89609147100654 |
| H | -6.60501703825776 | 2.70255370930758  | 2.80362253614599 |
| C | -3.87961795069761 | 0.01412147029408  | 3.42841319599997 |
| H | -2.73211147038645 | 1.07864972224031  | 1.96129055826330 |
| C | -5.08980956752471 | -0.01644405957883 | 4.12693086021033 |
| H | -7.02060306662763 | 0.88314278659001  | 4.45816560240466 |
| H | -3.12698496634931 | -0.74645852392259 | 3.61017907475804 |
| N | -5.27845969900207 | -1.01261064838540 | 5.14635681715924 |
| C | -6.24921395360314 | -1.99729679957827 | 5.15521765089696 |
| C | -4.50437361119553 | -1.11796390650488 | 6.28539947246856 |
| C | -6.10231107549552 | -2.78147365661043 | 6.33415299805337 |
| C | -7.22748294466414 | -2.25894052192754 | 4.18698807398077 |
| C | -4.97205477026943 | -2.21369649235617 | 7.06487112299730 |
| C | -3.44655106061336 | -0.28911759971388 | 6.69025198346859 |
| C | -6.96410860610769 | -3.84214566663110 | 6.55024991791915 |
| C | -8.08809379672184 | -3.32910068742089 | 4.42867180868835 |
| H | -7.29977373201522 | -1.65052139494129 | 3.29398821916269 |
| C | -4.34733523709074 | -2.50068292693587 | 8.26503955951533 |
| C | -2.83092648328496 | -0.60157162590238 | 7.90091015414160 |
| H | -3.14114993180191 | 0.55767573225041  | 6.08691022805692 |
| C | -7.96181173323812 | -4.10652227139472 | 5.58841311322193 |
| H | -6.87857222308604 | -4.46341803729204 | 7.43535065506010 |
| H | -8.86140530395618 | -3.56523715983615 | 3.70695571404222 |
| C | -3.26742170577383 | -1.68791466992876 | 8.67299332907048 |
| H | -4.67742564219470 | -3.32516987810427 | 8.88786397819648 |
| H | -2.00900347927998 | 0.01035233029627  | 8.25336479706023 |
| H | -8.64293697339172 | -4.93484337472325 | 5.74965346473559 |
| H | -2.77122362760510 | -1.90518232184725 | 9.61247696841452 |

### XYZ Coordinates of *p*Cz1 in T<sub>1</sub> optimized geometry

|   |                   |                  |                   |
|---|-------------------|------------------|-------------------|
| N | -1.87594738337934 | 5.77432156998694 | 2.99715526495052  |
| C | -2.89566886439412 | 4.81185097439760 | 3.01488898066333  |
| C | -3.54100167452215 | 4.48586640043839 | 1.73967961330513  |
| C | -3.27985405124899 | 5.31169925442307 | 0.61945410990364  |
| C | -2.28311181022909 | 6.31962046427880 | 0.66353890120877  |
| C | -1.51004858165014 | 6.55304364693602 | 1.88928385379800  |
| C | -4.53986392260362 | 3.41504911458062 | 1.63109327981390  |
| C | -2.02290418361193 | 7.12616965571517 | -0.47122877727252 |
| O | -3.19565082055206 | 4.28032963134539 | 4.09065189879533  |
| O | -0.61177298454067 | 7.39023562180514 | 1.95991024581165  |
| H | -1.24534452206008 | 7.87666598368809 | -0.39005981093719 |
| C | -4.04077166807649 | 5.15648528920711 | -0.58566040437666 |
| C | -3.77608549781373 | 5.97047275144249 | -1.69096546533788 |
| C | -4.55547279906196 | 5.82391141384923 | -2.93267308917730 |
| N | -5.56300633771547 | 4.84436685674542 | -2.92774219436114 |
| C | -5.87491090962745 | 4.00545975014450 | -1.84698127587636 |
| C | -5.07887566346286 | 4.18288370564886 | -0.62820571014092 |
| C | -5.30297518015335 | 3.34453372559230 | 0.46922861491970  |
| H | -6.04151950024645 | 2.56115561745458 | 0.34225913409513  |
| O | -6.77651271051274 | 3.17352062523166 | -1.94865841653699 |
| O | -4.33967920927504 | 6.51628608946742 | -3.92533440751077 |
| C | -2.74885719836188 | 6.95579269253544 | -1.62745243728059 |
| H | -2.57324617748970 | 7.56179687977517 | -2.50883951427928 |
| C | -6.36821163718973 | 4.65570629287201 | -4.13862013888159 |
| H | -6.25153995492027 | 3.63219452245184 | -4.50166171879181 |
| H | -7.42340534495573 | 4.81369473307261 | -3.90542840319177 |
| H | -6.02689383913342 | 5.36952779011353 | -4.88403447786522 |
| C | -1.20619640735358 | 6.02320567696413 | 4.27818764727802  |

|   |                   |                   |                  |
|---|-------------------|-------------------|------------------|
| H | -0.83017602383403 | 5.08140042697430  | 4.68188266201107 |
| H | -0.39246060031586 | 6.72129346967842  | 4.09836174863337 |
| H | -1.91597339364089 | 6.44097285563902  | 4.99622586671436 |
| C | -4.71656428813980 | 2.35785291079846  | 2.62626862074328 |
| C | -6.00973818311384 | 1.85488067166791  | 2.90490466570892 |
| C | -3.61715761562317 | 1.71938260129501  | 3.25276149128492 |
| C | -6.19979941326229 | 0.78224663698480  | 3.75732514145376 |
| H | -6.87396533689105 | 2.35424520338477  | 2.48029710931168 |
| C | -3.79682425036174 | 0.63223440138139  | 4.08658109586358 |
| H | -2.61243837565128 | 2.05638256083948  | 3.03412483358991 |
| C | -5.09160901099665 | 0.14988713102579  | 4.35428025952450 |
| H | -7.20144397350275 | 0.45028728672497  | 4.00607265370866 |
| H | -2.93934844882065 | 0.12133925162803  | 4.50938148102277 |
| N | -5.27969485034811 | -0.94791381719715 | 5.20897415156202 |
| C | -6.11093033502063 | -2.05284333940291 | 4.95515139177023 |
| C | -4.65418464351898 | -1.14060643740957 | 6.45305481181811 |
| C | -6.01542996143388 | -2.95537077696496 | 6.04306706593192 |
| C | -6.87919874689318 | -2.34591850184398 | 3.82506974247078 |
| C | -5.08987580572803 | -2.37429255362951 | 6.99665382312649 |
| C | -3.79640486053314 | -0.29056087502864 | 7.15652100645187 |
| C | -6.73320728710127 | -4.15202952430099 | 6.01466938786392 |
| C | -7.59133414680520 | -3.54529867742663 | 3.82098474681749 |
| H | -6.91158874981810 | -1.67727799921404 | 2.97318666876579 |
| C | -4.62563947395353 | -2.78165636105833 | 8.24829914428303 |
| C | -3.34328003164058 | -0.72015609953059 | 8.40374112932601 |
| H | -3.50381096875482 | 0.67396143121732  | 6.75862378038379 |
| C | -7.52746570204580 | -4.43706479197370 | 4.90345053496971 |
| H | -6.66576257825479 | -4.85237108389094 | 6.84174631229700 |
| H | -8.19996101916463 | -3.79426521080826 | 2.95728258866809 |



|   |                   |                   |                  |
|---|-------------------|-------------------|------------------|
| C | -3.74421209624500 | -1.95301178308752 | 8.94329987687093 |
| H | -4.95386552387133 | -3.72448402260336 | 8.67552167047303 |
| H | -2.67241787502818 | -0.08102747738980 | 8.96923295816712 |
| H | -8.09283796407310 | -5.36293537959732 | 4.86846795033393 |
| H | -3.37272863147144 | -2.25744185704508 | 9.91668132535272 |

**XYZ Coordinates of *o*Cz2 in S<sub>0</sub> optimized geometry**

|   |           |          |           |
|---|-----------|----------|-----------|
| N | 0.302167  | 0.501238 | -1.001684 |
| C | -1.024147 | 0.449158 | -0.559912 |
| C | -2.077959 | 0.557429 | -1.607375 |
| C | -1.706625 | 0.862579 | -2.945943 |
| C | -0.343305 | 1.008775 | -3.319661 |
| C | 0.717504  | 0.741565 | -2.312420 |
| C | -3.426092 | 0.389324 | -1.278901 |
| C | -0.010866 | 1.373222 | -4.626719 |
| O | -1.285625 | 0.323854 | 0.628281  |
| O | 1.910238  | 0.715929 | -2.583604 |
| C | -2.717369 | 1.033811 | -3.928779 |
| C | -2.356835 | 1.267274 | -5.273621 |
| C | -3.396820 | 1.420233 | -6.321287 |
| N | -4.730891 | 1.361466 | -5.887586 |
| C | -5.142051 | 1.167531 | -4.562426 |
| C | -4.075706 | 0.975250 | -3.551905 |
| C | -4.414269 | 0.667391 | -2.251283 |
| H | -5.463046 | 0.575079 | -1.996255 |
| O | -6.333553 | 1.149980 | -4.282915 |
| O | -3.115942 | 1.595668 | -7.499408 |
| C | -1.028026 | 1.430447 | -5.607046 |
| H | -0.776004 | 1.672427 | -6.632391 |
| C | -5.802280 | 1.521946 | -6.875430 |

|   |           |           |           |
|---|-----------|-----------|-----------|
| H | -6.443045 | 0.637523  | -6.866735 |
| H | -6.414187 | 2.388711  | -6.616708 |
| H | -5.342479 | 1.654226  | -7.851407 |
| C | 1.375659  | 0.297341  | -0.025880 |
| H | 1.965368  | -0.573193 | -0.316056 |
| H | 2.025956  | 1.172733  | -0.015124 |
| H | 0.918632  | 0.147775  | 0.948316  |
| C | -3.893655 | -0.265920 | -0.018569 |
| C | -3.858638 | -1.676308 | 0.041564  |
| C | -4.442847 | 0.440325  | 1.052008  |
| N | -3.335927 | -2.416061 | -1.073077 |
| C | -4.329288 | -2.349247 | 1.167237  |
| C | -4.912277 | -0.234999 | 2.179778  |
| H | -4.476141 | 1.524346  | 1.008085  |
| C | -1.963457 | -2.629550 | -1.275991 |
| C | -3.956154 | -2.416725 | -2.329422 |
| C | -4.850287 | -1.627612 | 2.243083  |
| H | -4.290413 | -3.433679 | 1.181597  |
| H | -5.324139 | 0.329189  | 3.011138  |
| C | -1.708516 | -2.767696 | -2.664214 |
| C | -0.944362 | -2.703215 | -0.326236 |
| C | -2.982023 | -2.618208 | -3.339379 |
| C | -5.305973 | -2.228852 | -2.632657 |
| H | -5.215153 | -2.152466 | 3.120527  |
| C | -0.394755 | -2.964405 | -3.105765 |
| C | 0.352782  | -2.913304 | -0.790818 |
| H | -1.157485 | -2.563698 | 0.727382  |
| C | -3.371524 | -2.587568 | -4.683246 |
| C | -5.669307 | -2.197333 | -3.977011 |

|   |           |           |           |
|---|-----------|-----------|-----------|
| H | -6.035509 | -2.075344 | -1.844551 |
| C | 0.630057  | -3.034937 | -2.164750 |
| H | -0.180261 | -3.054977 | -4.166663 |
| H | 1.166798  | -2.974889 | -0.075013 |
| C | -4.711896 | -2.364520 | -4.994303 |
| H | -2.635445 | -2.718931 | -5.471184 |
| H | -6.705874 | -2.016635 | -4.242136 |
| H | 1.654312  | -3.181525 | -2.492619 |
| H | -5.024128 | -2.324386 | -6.033442 |
| C | 1.329986  | 1.914077  | -5.008714 |
| C | 1.602556  | 3.266207  | -4.704057 |
| C | 2.280013  | 1.178707  | -5.717889 |
| N | 0.612386  | 4.047449  | -4.015894 |
| C | 2.815182  | 3.844690  | -5.073532 |
| C | 3.494723  | 1.759372  | -6.086267 |
| H | 2.073992  | 0.140104  | -5.956293 |
| C | 0.439403  | 4.016745  | -2.622675 |
| C | -0.628550 | 4.353583  | -4.590914 |
| C | 3.767578  | 3.088164  | -5.759307 |
| H | 2.993045  | 4.886462  | -4.826951 |
| H | 4.230070  | 1.170327  | -6.626014 |
| C | -0.913687 | 4.304374  | -2.310236 |
| C | 1.384816  | 3.751568  | -1.631279 |
| C | -1.599439 | 4.507792  | -3.569843 |
| C | -0.954720 | 4.474604  | -5.943154 |
| H | 4.712891  | 3.539052  | -6.044988 |
| C | -1.329013 | 4.298613  | -0.973714 |
| C | 0.948542  | 3.765664  | -0.307316 |
| H | 2.408459  | 3.507562  | -1.891836 |

|   |           |          |           |
|---|-----------|----------|-----------|
| C | -2.932351 | 4.750280 | -3.920527 |
| C | -2.288486 | 4.711008 | -6.268582 |
| H | -0.197532 | 4.351218 | -6.710272 |
| C | -0.394187 | 4.025378 | 0.021934  |
| H | -2.366604 | 4.497356 | -0.721321 |
| H | 1.660309  | 3.562431 | 0.487048  |
| C | -3.271037 | 4.838407 | -5.269523 |
| H | -3.692690 | 4.848928 | -3.151085 |
| H | -2.576834 | 4.774363 | -7.312786 |
| H | -0.702380 | 4.007082 | 1.062342  |
| H | -4.303965 | 5.012018 | -5.555457 |

**XYZ Coordinates of *o*Cz2 in S<sub>1</sub> optimized geometry**

|   |                   |                  |                   |
|---|-------------------|------------------|-------------------|
| N | 0.21592542843855  | 0.52679498718716 | -1.07638718980667 |
| C | -1.10867760753681 | 0.46400941976814 | -0.63389956228773 |
| C | -2.14194831404360 | 0.65509255717256 | -1.64795752855237 |
| C | -1.77688837692909 | 0.94247802228825 | -2.98942223434688 |
| C | -0.41567990983615 | 1.03466526142848 | -3.38132749733518 |
| C | 0.63361239186366  | 0.76937978805292 | -2.39895287802058 |
| C | -3.51891225233806 | 0.53651179668916 | -1.30274045415202 |
| C | -0.09039796510999 | 1.35338519216367 | -4.72764470951420 |
| O | -1.36259044643541 | 0.20918293101911 | 0.55301557773082  |
| O | 1.83780237927110  | 0.71068673017491 | -2.65623913881455 |
| C | -2.80376116286481 | 1.11856747354288 | -3.97269892630873 |
| C | -2.44973723026226 | 1.27348378537943 | -5.33046132941798 |
| C | -3.48017626900381 | 1.44412910504988 | -6.35505556303419 |
| N | -4.81771425121074 | 1.40986512219935 | -5.90089203956637 |
| C | -5.22100778685526 | 1.24044486321559 | -4.57028246885600 |
| C | -4.15785467844337 | 1.11657692344152 | -3.57404206274824 |
| C | -4.49393412347446 | 0.84472465090384 | -2.24029487579659 |

|   |                   |                   |                   |
|---|-------------------|-------------------|-------------------|
| H | -5.54622542418200 | 0.75689726889888  | -1.99433432516232 |
| O | -6.42377715036838 | 1.16006749444703  | -4.29821905109074 |
| O | -3.22688455057051 | 1.59752546808821  | -7.55088216569523 |
| C | -1.09862756129438 | 1.39269652819635  | -5.68509153104565 |
| H | -0.86481011846463 | 1.62882289270277  | -6.71667044803378 |
| C | -5.89227255127321 | 1.56794440595404  | -6.88094594971370 |
| H | -6.54844533202972 | 0.69443553363515  | -6.85798043028907 |
| H | -6.49643232559214 | 2.44311831263411  | -6.62974903095373 |
| H | -5.43631086208232 | 1.68445009590067  | -7.86095392966501 |
| C | 1.29004039968530  | 0.32001774195658  | -0.10632187503507 |
| H | 1.88251937513120  | -0.55297331433108 | -0.38940174564582 |
| H | 1.94854079146212  | 1.18874067167763  | -0.10647565729616 |
| H | 0.83566422901824  | 0.18110076850600  | 0.87119035798632  |
| C | -3.97272130500907 | -0.18706666455715 | -0.07654933114368 |
| C | -3.90351356873584 | -1.59496455431239 | -0.04091957935390 |
| C | -4.57700755881976 | 0.44407034603578  | 1.01413868875718  |
| N | -3.27773064148755 | -2.28113366365274 | -1.15282156318378 |
| C | -4.36852977725867 | -2.34262873359561 | 1.03725694334243  |
| C | -5.06082527579259 | -0.28957457466647 | 2.09731808043538  |
| H | -4.64200304480360 | 1.52696545926255  | 1.00613786530142  |
| C | -1.93923919261085 | -2.63086594658855 | -1.19448123351402 |
| C | -3.81317653241158 | -2.37646125018684 | -2.43105056117392 |
| C | -4.95550879628968 | -1.68161127572626 | 2.11696509525731  |
| H | -4.28363695274162 | -3.42444623640764 | 1.01841849318841  |
| H | -5.51857449624921 | 0.22892314106101  | 2.93427836888038  |
| C | -1.57594211540920 | -2.91849242605011 | -2.54103236660941 |
| C | -1.02263108898178 | -2.66192012597016 | -0.13586777415643 |
| C | -2.78797846615871 | -2.74849458693291 | -3.33925093235834 |
| C | -5.12608121162545 | -2.12234799658453 | -2.83949908821208 |

|   |                   |                   |                   |
|---|-------------------|-------------------|-------------------|
| H | -5.33086733928713 | -2.25170890860099 | 2.96042746076911  |
| C | -0.25618687735761 | -3.20807812026812 | -2.83573144593393 |
| C | 0.29549330103681  | -2.98986662379823 | -0.45278948797498 |
| H | -1.32182864062904 | -2.37304197696901 | 0.86256225208373  |
| C | -3.07614868003166 | -2.82240466577681 | -4.69228036814222 |
| C | -5.40048865267520 | -2.21049083199040 | -4.20357933605207 |
| H | -5.88000010911635 | -1.82163311348724 | -2.12272124057836 |
| C | 0.67606915528869  | -3.24758710090623 | -1.77533700378627 |
| H | 0.06990508045845  | -3.37250196722011 | -3.85732281966649 |
| H | 1.04313064097145  | -3.00655780493444 | 0.33163677966093  |
| C | -4.39158236184002 | -2.54571072328565 | -5.11596233468900 |
| H | -2.30465150223874 | -3.05605502508203 | -5.41795357757578 |
| H | -6.39396634694070 | -1.97112699030835 | -4.56352624782217 |
| H | 1.71621433905180  | -3.45970819154637 | -1.99789872880525 |
| H | -4.62135195190312 | -2.57503054500373 | -6.17558858275491 |
| C | 1.24636625292106  | 1.89786443387755  | -5.11051760310943 |
| C | 1.55096784198007  | 3.23390048650487  | -4.76560874203742 |
| C | 2.17063893637614  | 1.17825306958927  | -5.86980096496700 |
| N | 0.60074648317170  | 4.01136965683094  | -4.02011040342948 |
| C | 2.76467947990174  | 3.80558582773739  | -5.14324588190601 |
| C | 3.38583511353604  | 1.75061544208393  | -6.24854112692247 |
| H | 1.93652354977790  | 0.15201131701919  | -6.13723264241264 |
| C | 0.53398857679934  | 4.01627085942512  | -2.61888797296366 |
| C | -0.67202844504477 | 4.33564136293484  | -4.50860295015552 |
| C | 3.68922451338560  | 3.06150184842533  | -5.87915593604761 |
| H | 2.96562422527190  | 4.83526952135307  | -4.86487338166119 |
| H | 4.09803961179150  | 1.17074428566237  | -6.82838125331578 |
| C | -0.78631521065204 | 4.33884599677844  | -2.21295716466798 |
| C | 1.54797989240886  | 3.76087267045813  | -1.69603690251908 |

|   |                   |                  |                   |
|---|-------------------|------------------|-------------------|
| C | -1.55974196582852 | 4.53268309883239 | -3.42209373802258 |
| C | -1.09425986564038 | 4.44971112045464 | -5.83391132760998 |
| H | 4.63396846574854  | 3.50915993132307 | -6.17221032044757 |
| C | -1.09725777813005 | 4.37697894946124 | -0.84926074621807 |
| C | 1.21715951732338  | 3.82639515076981 | -0.34331382464212 |
| H | 2.54086854801834  | 3.48049959321804 | -2.02814828033241 |
| C | -2.90705908982895 | 4.81392704706796 | -3.67687825099349 |
| C | -2.44045342735969 | 4.72168072343696 | -6.06393543759849 |
| H | -0.40121212762016 | 4.28745756932563 | -6.65230840759958 |
| C | -0.09126117717983 | 4.12126693783748 | 0.07984072636187  |
| H | -2.11077928518106 | 4.59255744710704 | -0.52310263825177 |
| H | 1.98555160752028  | 3.63366795609581 | 0.39971536563865  |
| C | -3.34216338776281 | 4.89461201740465 | -4.99762683504168 |
| H | -3.60481357746349 | 4.94600409220541 | -2.85497162071355 |
| H | -2.80364391451066 | 4.77128143169652 | -7.08533489840503 |
| H | -0.31860567762087 | 4.14247846541516 | 1.14107087329115  |
| H | -4.38885346118060 | 5.09076788977424 | -5.20904847502186 |

**XYZ Coordinates of *o*Cz2 in T<sub>1</sub> optimized geometry**

|   |                   |                  |                   |
|---|-------------------|------------------|-------------------|
| N | 0.15312444967770  | 0.49222444161953 | -1.22416745201021 |
| C | -1.16726362180451 | 0.59120242421604 | -0.76445929764633 |
| C | -2.20605372847608 | 0.72752788424369 | -1.79051035479553 |
| C | -1.83786976134069 | 0.87844725966303 | -3.14862386245814 |
| C | -0.48321925947866 | 0.88101833204163 | -3.54648317288482 |
| C | 0.56255808826431  | 0.62757375284287 | -2.55464501688825 |
| C | -3.59998003892555 | 0.71188545122830 | -1.43006109808328 |
| C | -0.14382154570351 | 1.14634884648892 | -4.92167283728075 |
| O | -1.42263827550753 | 0.54136118122392 | 0.44135201472132  |
| O | 1.76022571690514  | 0.53972678334983 | -2.83735924081346 |
| C | -2.85639461852549 | 1.05018495425793 | -4.13993329327813 |

|   |                   |                   |                   |
|---|-------------------|-------------------|-------------------|
| C | -2.50466466559138 | 1.05521903305060  | -5.50333628347166 |
| C | -3.53210693621633 | 1.21990999106745  | -6.53685690589796 |
| N | -4.85106167701235 | 1.38629624921131  | -6.08004179628158 |
| C | -5.24532585137990 | 1.41259898821315  | -4.73511913295477 |
| C | -4.18968591654715 | 1.23065412441363  | -3.73582085622619 |
| C | -4.54320012905392 | 1.06419284112670  | -2.37122143456359 |
| H | -5.59883792994966 | 1.06352380470799  | -2.12331867590056 |
| O | -6.43183767749769 | 1.56546705349422  | -4.44135296054060 |
| O | -3.26415235146427 | 1.23505820086458  | -7.73899038224216 |
| C | -1.13626601845095 | 1.11247117388368  | -5.87663777296440 |
| H | -0.90846583656347 | 1.30237909373997  | -6.91966392250062 |
| C | -5.91932282700501 | 1.56595490628179  | -7.06572650065130 |
| H | -6.65985902208058 | 0.76986064648222  | -6.95798271140891 |
| H | -6.42364174012171 | 2.51953066678707  | -6.89333315738965 |
| H | -5.47006400099920 | 1.54110005990623  | -8.05539745873463 |
| C | 1.22289076336253  | 0.25076351992927  | -0.25197840423145 |
| H | 1.75551727483962  | -0.65999126102073 | -0.52608142183869 |
| H | 1.92273016947335  | 1.08593603030612  | -0.26524423587937 |
| H | 0.76488336800380  | 0.15016155401950  | 0.72804814129405  |
| C | -4.07652344803359 | 0.02875055534738  | -0.19659638282607 |
| C | -3.87353778257809 | -1.36602068695085 | -0.10413769942577 |
| C | -4.79576224532332 | 0.66513572998491  | 0.81659587087874  |
| N | -3.17530391379554 | -2.04093108433386 | -1.15827912380430 |
| C | -4.32666109102510 | -2.08485959881492 | 1.00049056277839  |
| C | -5.25338787373748 | -0.05323936430470 | 1.92241859646631  |
| H | -4.96671076097106 | 1.73467169934300  | 0.74594987491908  |
| C | -1.84829777835318 | -2.47543631535761 | -1.08671940347601 |
| C | -3.59806891015401 | -2.13229906133205 | -2.48719523320341 |
| C | -5.01120544567898 | -1.42447772183218 | 2.02231978488426  |



|   |                   |                   |                   |
|---|-------------------|-------------------|-------------------|
| H | -4.15345421628394 | -3.15559130926880 | 1.04058333856073  |
| H | -5.79418693581177 | 0.46104344121389  | 2.71122432525003  |
| C | -1.39649551288042 | -2.79674065631035 | -2.39384136293554 |
| C | -1.02173390118529 | -2.57619461341295 | 0.03370651494277  |
| C | -2.51130537613896 | -2.56260528102389 | -3.29125892722137 |
| C | -4.85326927938442 | -1.85395878839707 | -3.03143764206854 |
| H | -5.36608054914442 | -1.98240870275250 | 2.88318657094515  |
| C | -0.07849931329327 | -3.22445137353525 | -2.57590601922370 |
| C | 0.28057860912893  | -3.02427780417049 | -0.17412100868176 |
| H | -1.37777216674584 | -2.28284935068191 | 1.01384683216794  |
| C | -2.67594513769255 | -2.64794163354616 | -4.67568432044869 |
| C | -4.99499896063166 | -1.95222237240691 | -4.41730730336343 |
| H | -5.67963299032588 | -1.55100334713290 | -2.39913906772718 |
| C | 0.75129221619280  | -3.34149790326675 | -1.46133452422698 |
| H | 0.29171056077195  | -3.45915926891103 | -3.56925158156196 |
| H | 0.95076632656912  | -3.11462752373704 | 0.67525522883015  |
| C | -3.91718881064378 | -2.32742004199494 | -5.23351945233550 |
| H | -1.84659022753613 | -2.94595022555643 | -5.30994575922808 |
| H | -5.95355346981026 | -1.71123393348962 | -4.86590936389815 |
| H | 1.77665246045621  | -3.67426998092823 | -1.58801253004081 |
| H | -4.05094652741045 | -2.37445780580282 | -6.30951896398280 |
| C | 1.15003735656024  | 1.78912399967131  | -5.27702397541231 |
| C | 1.39345065696766  | 3.08024291155913  | -4.75590091317536 |
| C | 2.08002621420274  | 1.24468504214895  | -6.16480140491538 |
| N | 0.42106141761222  | 3.67849033781136  | -3.88738776547693 |
| C | 2.56260108645050  | 3.77163696339224  | -5.06767788843986 |
| C | 3.24905611111327  | 1.93777481445011  | -6.48270835973686 |
| H | 1.89411349306694  | 0.25913696515905  | -6.57959315405420 |
| C | 0.54637130374058  | 3.78691306527956  | -2.49902061799129 |

|   |                   |                  |                   |
|---|-------------------|------------------|-------------------|
| C | -0.88888479382764 | 4.01515898203610 | -4.23948325671126 |
| C | 3.49849479074068  | 3.19440558663369 | -5.92758937593000 |
| H | 2.71869269604949  | 4.76109210957678 | -4.64956577535601 |
| H | 3.97095192958457  | 1.49129515907965 | -7.15989556818671 |
| C | -0.71573756675345 | 4.13280138075747 | -1.94719750935595 |
| C | 1.67458113536976  | 3.57622289355350 | -1.70419508572879 |
| C | -1.63545256183958 | 4.26957720557776 | -3.05976094543619 |
| C | -1.46447225320947 | 4.09916777579459 | -5.50872340979588 |
| H | 4.40905658726641  | 3.73147404065104 | -6.17382855442874 |
| C | -0.84911581590576 | 4.24578005237429 | -0.56115574034698 |
| C | 1.51809670711464  | 3.72028008910364 | -0.32741347582025 |
| H | 2.61775896829175  | 3.27837127742628 | -2.14652134464021 |
| C | -2.99907721286905 | 4.55039475448863 | -3.15929185861515 |
| C | -2.82878214506655 | 4.38900221847930 | -5.58369387124646 |
| H | -0.87346959478925 | 3.92425048908032 | -6.40023955063420 |
| C | 0.27188757838722  | 4.03920249224921 | 0.24143687997619  |
| H | -1.81183608316064 | 4.48148396019436 | -0.11829778789560 |
| H | 2.37469007072409  | 3.56529670561572 | 0.32149110534285  |
| C | -3.59278218084878 | 4.59480941501799 | -4.42514793172745 |
| H | -3.59314961800686 | 4.71699256763410 | -2.26598136350903 |
| H | -3.30497648061213 | 4.43188496737333 | -6.55800281157785 |
| H | 0.18233621384767  | 4.11904066952428 | 1.31988893089537  |
| H | -4.65621895958153 | 4.79309444402872 | -4.51217296721097 |

**XYZ Coordinates of *o*Cz2i in S<sub>0</sub> optimized geometry**

|   |                   |                   |                   |
|---|-------------------|-------------------|-------------------|
| N | -0.42514344495971 | -1.24794683034982 | -4.57116316928816 |
| C | -0.99145113608818 | -1.00540152037545 | -3.31051246230953 |
| C | -2.20212387410358 | -0.13705466141346 | -3.27098232613731 |
| C | -2.63038847231036 | 0.50993828774279  | -4.45978046265390 |
| C | -2.02185648339976 | 0.21980763008488  | -5.70133645961637 |

|   |                   |                   |                    |
|---|-------------------|-------------------|--------------------|
| C | -0.88482654025865 | -0.72416761807615 | -5.78116475334075  |
| C | -2.90221716213757 | 0.07175152656911  | -2.08047466236429  |
| C | -2.43278474858843 | 0.87410834889907  | -6.84449187663293  |
| O | -0.48460079007668 | -1.47043114387270 | -2.29904850087489  |
| O | -0.33552603316170 | -1.01868098894595 | -6.83456015847887  |
| H | -1.90540930447493 | 0.67206992318620  | -7.76912981519294  |
| C | -3.72555772052735 | 1.41335512706509  | -4.43810460615066  |
| C | -4.15385094265356 | 2.06031489508779  | -5.62691018680379  |
| C | -5.36454121781714 | 2.92863745414798  | -5.58737486884827  |
| N | -5.93077373074964 | 3.17128025636711  | -4.32670980399535  |
| C | -5.47110067158169 | 2.64748406427115  | -3.11671225018662  |
| C | -4.33408728638415 | 1.70348865335841  | -3.19654832402795  |
| C | -3.92319333729951 | 1.04914841043257  | -2.05340291088331  |
| H | -4.45058083943623 | 1.25117273613915  | -1.12876855411590  |
| O | -6.02042309990545 | 2.94195852076501  | -2.06331725346203  |
| O | -5.87150822899826 | 3.39351209165531  | -6.59885129985271  |
| C | -3.45379208965574 | 1.85147352586661  | -6.81743153846191  |
| C | -7.11004448339668 | 4.03672601850293  | -4.23994896509304  |
| H | -7.95218640821420 | 3.46898969668433  | -3.83710693385096  |
| H | -6.89709229462131 | 4.86681135480856  | -3.56512977835412  |
| H | -7.33687312464184 | 4.39932334525999  | -5.23876850286784  |
| C | 0.75411530636297  | -2.11340733088556 | -4.65793245979941  |
| H | 0.98125368159844  | -2.47558863390922 | -3.65903227229940  |
| H | 0.54099055811446  | -2.94379517323985 | -5.33233214716654  |
| H | 1.59609468746098  | -1.54580707720920 | -5.06129360766300  |
| C | -3.56783928726198 | 2.74490954315322  | -8.01051671078620  |
| C | -4.22749111529726 | 2.37324360535778  | -9.18247387000448  |
| C | -2.89548871864154 | 3.98678105520836  | -7.97114393162391  |
| C | -4.25654206240593 | 3.23211580657338  | -10.28258423159516 |

|   |                   |                   |                    |
|---|-------------------|-------------------|--------------------|
| H | -4.74015153406613 | 1.41721635631260  | -9.21962701429254  |
| C | -2.92360326186392 | 4.84172338467787  | -9.07092638766237  |
| N | -2.17805543249134 | 4.36453990497076  | -6.78525349528175  |
| C | -3.61288792350115 | 4.46875712768958  | -10.22678041437356 |
| H | -4.78617280947313 | 2.93439359354974  | -11.18253671982993 |
| H | -2.39518770800109 | 5.78774587538986  | -9.01075832286615  |
| C | -2.80163124837302 | 4.94724215602242  | -5.67040667364376  |
| C | -1.06211281426265 | 3.65277505152224  | -6.32410606767772  |
| H | -3.63614877757851 | 5.13695133517017  | -11.08205291660757 |
| C | -2.08200706501310 | 4.60703325147274  | -4.49692091030610  |
| C | -3.95172223425012 | 5.73587693716962  | -5.62988912446825  |
| C | -0.97620903356472 | 3.76815619701920  | -4.91361295070070  |
| C | -0.14712781255804 | 2.89744648686182  | -7.05973732383745  |
| C | -2.54357615847371 | 5.05449036706380  | -3.25348421747207  |
| C | -4.38424457824926 | 6.17800192197979  | -4.38102363798556  |
| H | -4.50494672877049 | 5.95613254035204  | -6.53563774601654  |
| C | 0.02716849743651  | 3.07344409573410  | -4.22847572061888  |
| C | 0.84039041610847  | 2.21156480547357  | -6.35597070417772  |
| H | -0.22997098915252 | 2.82147070228345  | -8.13876104700608  |
| H | -2.01571495366121 | 4.78591883225950  | -2.34312940866236  |
| C | -3.69476017960868 | 5.83741344592892  | -3.20264884006249  |
| H | -5.27950705194960 | 6.78913262688741  | -4.31765684142696  |
| C | 0.92187147190510  | 2.28814826304341  | -4.95347791340339  |
| H | 0.09374938325061  | 3.13232511220822  | -3.14588695871343  |
| H | 1.54339260746359  | 1.58883890193595  | -6.89969553027074  |
| H | -4.06926360842832 | 6.18340945909344  | -2.24456835929467  |
| H | 1.69508228326412  | 1.73225577762418  | -4.43190532917845  |
| C | -2.78824727012793 | -0.82174966963185 | -0.88743110917714  |
| C | -2.12862029535264 | -0.45017594952124 | 0.28456906961792   |

|   |                   |                   |                   |
|---|-------------------|-------------------|-------------------|
| C | -3.46065608973076 | -2.06358831192680 | -0.92689244984919 |
| C | -2.09964844362468 | -1.30910768819423 | 1.38463516140671  |
| H | -1.61591523243532 | 0.50582468602299  | 0.32179075969960  |
| C | -3.43262120337204 | -2.91858849207533 | 0.17284689539635  |
| N | -4.17806887396001 | -2.44125482501694 | -2.11282572355156 |
| C | -2.74335942194053 | -2.54571499600563 | 1.32874451836003  |
| H | -1.57003485031258 | -1.01145804216212 | 2.28462158339321  |
| H | -3.96107903172990 | -3.86458313259615 | 0.11261112322728  |
| C | -5.29397444275702 | -1.72942909068787 | -2.57396906572583 |
| C | -3.55448510354452 | -3.02392849317477 | -3.22768325935239 |
| H | -2.72015997325212 | -3.21395501219190 | 2.18398279731488  |
| C | -5.37984376035145 | -1.84473998950562 | -3.98447041780436 |
| C | -6.20895329353042 | -0.97410269108599 | -1.83832778281523 |
| C | -4.27406548597786 | -2.68363793219925 | -4.40117225404531 |
| C | -2.40442289098351 | -3.81260497173146 | -3.26820811144505 |
| C | -6.38317475249708 | -1.14995659018650 | -4.66960357748559 |
| C | -7.19642652647710 | -0.28815187671109 | -2.54209000194720 |
| H | -6.12613765795500 | -0.89818009749066 | -0.75929816829053 |
| C | -3.81247993776780 | -3.13105138927589 | -5.64461840411334 |
| C | -1.97188449825984 | -4.25468603728865 | -4.51708350049913 |
| H | -1.85122815785755 | -4.03292327306748 | -2.36245695706760 |
| H | -6.44972377600393 | -1.20877964026300 | -5.75219741598081 |
| C | -7.27786996196639 | -0.36466357336840 | -3.94458905841027 |
| H | -7.89942277479175 | 0.33457205183982  | -1.99835530904510 |
| C | -2.66132309886689 | -3.91401392950940 | -5.69546131511739 |
| H | -4.34030717948634 | -2.86241476911322 | -6.55497365664191 |
| H | -1.07664856960872 | -4.86585570467436 | -4.58045335908139 |
| H | -8.05104555635128 | 0.19128154166094  | -4.46615755479318 |
| H | -2.28680522975226 | -4.25997651947381 | -6.65354822555623 |

**XYZ Coordinates of *o*Cz2i in S<sub>1</sub> optimized geometry**

|   |                   |                   |                   |
|---|-------------------|-------------------|-------------------|
| N | -1.05014150778318 | -1.27280198522194 | -5.11154282246850 |
| C | -1.46924745905496 | -0.99477124784699 | -3.80437022533663 |
| C | -2.55596246673926 | -0.03053067727228 | -3.65119217525074 |
| C | -3.00100520237546 | 0.69827836510801  | -4.78537257660690 |
| C | -2.51759535488723 | 0.40468891851379  | -6.08178942149622 |
| C | -1.52357899754667 | -0.64059745189029 | -6.27897603223711 |
| C | -3.10321022782044 | 0.26502894042782  | -2.36814728673514 |
| C | -2.86260616417093 | 1.22882074020707  | -7.16351782869654 |
| O | -0.93224209377823 | -1.56701597411202 | -2.84130649421766 |
| O | -1.06486719243013 | -0.97374606049848 | -7.37390436629273 |
| H | -2.36585157450103 | 1.04884923447480  | -8.11002111035669 |
| C | -3.94915111020126 | 1.76152951939532  | -4.63854774323760 |
| C | -4.32520895522834 | 2.54915501723028  | -5.75491844491984 |
| C | -5.36084633328764 | 3.57827112350007  | -5.59988634151068 |
| N | -5.85290996345031 | 3.78802357096040  | -4.29411332123945 |
| C | -5.43869692961165 | 3.10704870190675  | -3.14685405852005 |
| C | -4.44131926382304 | 2.05458752607522  | -3.34460010213745 |
| C | -4.00036270252359 | 1.31821539391101  | -2.23772817862342 |
| H | -4.43492659824752 | 1.56134115612203  | -1.27340393752827 |
| O | -5.93206445433076 | 3.37861352289506  | -2.04824047565272 |
| O | -5.81490463480872 | 4.22706658873054  | -6.54350483033636 |
| C | -3.68889516812285 | 2.33559292422867  | -7.00705481182117 |
| C | -6.87935427404799 | 4.81051525529130  | -4.09119354610487 |
| H | -7.80290673206684 | 4.34676339764747  | -3.73392984741129 |
| H | -6.53641093724245 | 5.51738839332312  | -3.33489154862908 |
| H | -7.04585639110156 | 5.31014533660213  | -5.04182407418367 |
| C | 0.02991166091284  | -2.23808141957409 | -5.31400945009063 |
| H | 0.35559590833663  | -2.58919006470315 | -4.33847411542330 |

|   |                   |                   |                    |
|---|-------------------|-------------------|--------------------|
| H | -0.32560149734918 | -3.06928730538941 | -5.92790871883208  |
| H | 0.85361442746825  | -1.75924912572510 | -5.84802566420496  |
| C | -3.63267582091840 | 3.38680180066540  | -8.06577201091465  |
| C | -4.25811482752836 | 3.25313069016997  | -9.30684368750693  |
| C | -2.82280185797317 | 4.52407372824221  | -7.84060196818009  |
| C | -4.12608860243510 | 4.23885118264970  | -10.28635305775362 |
| H | -4.87273598913572 | 2.37736297590432  | -9.48976470147696  |
| C | -2.69213063607536 | 5.50861404936860  | -8.81861127052880  |
| N | -2.12924280310117 | 4.67246493208484  | -6.59289892812935  |
| C | -3.35190376684127 | 5.37310621917704  | -10.04154712692801 |
| H | -4.63324347601191 | 4.12174604817495  | -11.23966876031858 |
| H | -2.06090066308979 | 6.36725060990412  | -8.61251005725168  |
| C | -2.68023051146266 | 5.30887998527329  | -5.47153675465793  |
| C | -1.14846729557060 | 3.78180844002305  | -6.14051412920457  |
| H | -3.24919079178759 | 6.14251651652943  | -10.80074704785549 |
| C | -2.05441288735706 | 4.81611775784614  | -4.29809946801784  |
| C | -3.68808449618037 | 6.27181674880402  | -5.42185202783799  |
| C | -1.08234417696309 | 3.83125968510293  | -4.72518496843095  |
| C | -0.32849810001500 | 2.93255256370142  | -6.88488075522611  |
| C | -2.46605776883464 | 5.29091774784480  | -3.04766364464912  |
| C | -4.06970202248515 | 6.73802949163055  | -4.16552576558368  |
| H | -4.18271019462565 | 6.60240725320550  | -6.32759001661703  |
| C | -0.20672053187045 | 2.97535053688445  | -4.04705904014723  |
| C | 0.53355104393635  | 2.08874012583674  | -6.18868687724010  |
| H | -0.39597029984701 | 2.90498646688854  | -7.96695704976195  |
| H | -2.01230638044605 | 4.90610289624130  | -2.13897001469658  |
| C | -3.47209190076323 | 6.25221099620407  | -2.98830738550092  |
| H | -4.85817815214960 | 7.48145110745457  | -4.09518672913310  |
| C | 0.58846359948990  | 2.09965431665718  | -4.78269210196998  |

|   |                   |                   |                   |
|---|-------------------|-------------------|-------------------|
| H | -0.16622729694910 | 2.98164663304674  | -2.96158274413343 |
| H | 1.15318107939716  | 1.39176695937165  | -6.74440341720398 |
| H | -3.80798268176517 | 6.62253436300490  | -2.02483916210153 |
| H | 1.25587408837911  | 1.41547562775535  | -4.26740564719596 |
| C | -2.87445267300550 | -0.56454236721990 | -1.15150474779323 |
| C | -2.37359105637026 | 0.02422547011855  | 0.01653414472835  |
| C | -3.21216936610862 | -1.93189709568603 | -1.06906014882593 |
| C | -2.18510315754475 | -0.70748576200178 | 1.18862854958579  |
| H | -2.10954011174018 | 1.07567613212216  | -0.01927953214931 |
| C | -3.01253568161667 | -2.68159580070663 | 0.09305073964190  |
| N | -3.75996584254598 | -2.61865377267137 | -2.20460219541756 |
| C | -2.49732763630074 | -2.06746073776095 | 1.23108414992377  |
| H | -1.78535446124404 | -0.21467222046129 | 2.06954135896500  |
| H | -3.29131368528835 | -3.73052052081333 | 0.10327403684175  |
| C | -4.95356469861351 | -2.31233386845351 | -2.85050237496887 |
| C | -3.15796931504905 | -3.68856364792080 | -2.84386820994236 |
| H | -2.35464202908869 | -2.64190871625117 | 2.14021114639241  |
| C | -5.12221556375271 | -3.19489124776226 | -3.94937515456956 |
| C | -5.90856231715077 | -1.34661681451665 | -2.51364706338016 |
| C | -3.96765601201475 | -4.08618842138062 | -3.94382681832653 |
| C | -1.92872401093741 | -4.29948713819257 | -2.55352798658056 |
| C | -6.24561248538077 | -3.08083431042730 | -4.75033350461379 |
| C | -7.03077744035004 | -1.24304767483792 | -3.33368802649972 |
| H | -5.76325675944496 | -0.68910362555300 | -1.66818944287716 |
| C | -3.55121670770004 | -5.12832355966452 | -4.75312772073855 |
| C | -1.53828872618741 | -5.35753084477184 | -3.36835057265072 |
| H | -1.29901745243772 | -3.91500555572815 | -1.76351003249459 |
| H | -6.39546450335357 | -3.73764275219994 | -5.60063433911355 |
| C | -7.19584156740531 | -2.08819622306525 | -4.43869893306793 |



|   |                   |                   |                   |
|---|-------------------|-------------------|-------------------|
| H | -7.77729840669426 | -0.48824855436412 | -3.11568643561171 |
| C | -2.33316487988853 | -5.76875731908607 | -4.44965356733040 |
| H | -4.13933035476005 | -5.44245256817880 | -5.60867713235151 |
| H | -0.59267169987993 | -5.85336709003517 | -3.18084639291420 |
| H | -8.07266059514924 | -1.97864471776894 | -5.06756901251705 |
| H | -1.99498549220168 | -6.58527844472591 | -5.07869391508696 |

**XYZ Coordinates of *o*Cz2i in T<sub>1</sub> optimized geometry**

|   |                   |                   |                   |
|---|-------------------|-------------------|-------------------|
| N | -0.64757343318000 | -1.45819438905099 | -4.74481275860019 |
| C | -1.03141192265243 | -1.08318085180331 | -3.44663614944330 |
| C | -2.14488944160649 | -0.13439808299570 | -3.33678261935803 |
| C | -2.68532623162777 | 0.44476660165794  | -4.49974663497328 |
| C | -2.30231583482688 | -0.00683242111564 | -5.78222213361596 |
| C | -1.24288655043044 | -1.00656410767464 | -5.92699087205312 |
| C | -2.69330086907416 | 0.21531189300542  | -2.04776033820645 |
| C | -2.79934287988796 | 0.63818542309542  | -6.94112857729566 |
| O | -0.44403961570025 | -1.53586577640092 | -2.46147836945702 |
| O | -0.84386026241560 | -1.40960082493002 | -7.02082367778913 |
| H | -2.35772732694749 | 0.36354551232428  | -7.89280003312293 |
| C | -3.67083244946150 | 1.47866938898119  | -4.39817745062774 |
| C | -4.21125580087357 | 2.05783179269692  | -5.56113906141517 |
| C | -5.32472408816302 | 3.00664242053028  | -5.45127833586895 |
| N | -5.70852403243611 | 3.38169654228661  | -4.15310307428350 |
| C | -5.11320460983253 | 2.93007232541374  | -2.97092077393714 |
| C | -4.05381531318822 | 1.93029978316123  | -3.11569239934646 |
| C | -3.55678218982865 | 1.28527959699518  | -1.95679208454754 |
| H | -3.99837559884922 | 1.55989155916420  | -1.00510054849986 |
| O | -5.51217281944512 | 3.33316459279543  | -1.87708832739476 |
| O | -5.91207223922695 | 3.45935747896502  | -6.43642938107360 |
| C | -3.66286220864790 | 1.70812029222297  | -6.85014983966497 |

|   |                   |                   |                    |
|---|-------------------|-------------------|--------------------|
| C | -6.83862896617249 | 4.29983844150229  | -3.99303797273936  |
| H | -7.68691996571006 | 3.77114851154453  | -3.54860895737227  |
| H | -6.54751893219697 | 5.11086146706442  | -3.32654454092023  |
| H | -7.10480641131067 | 4.67980291291182  | -4.97561666488323  |
| C | 0.48260122878008  | -2.37624609469902 | -4.90490246994579  |
| H | 0.74892012570341  | -2.75608052900687 | -3.92231234169016  |
| H | 0.19149597626077  | -3.18737038235513 | -5.57127465548281  |
| H | 1.33077592078833  | -1.84751913866278 | -5.34950582247330  |
| C | -3.72187089180338 | 2.65954398760695  | -7.99059822954679  |
| C | -4.26306246765319 | 2.34465498749049  | -9.23913341536719  |
| C | -3.10363734872908 | 3.91902973934089  | -7.82315242747280  |
| C | -4.24675735210526 | 3.27824834696996  | -10.27603802251045 |
| H | -4.72720499937555 | 1.37360682131088  | -9.37932205535041  |
| C | -3.09058188168285 | 4.85471243386715  | -8.85615881513478  |
| N | -2.49290032345816 | 4.23611813460962  | -6.56619750268197  |
| C | -3.67274724862164 | 4.53672095323343  | -10.08417649351604 |
| H | -4.69085457228542 | 3.02520355610471  | -11.23406669397872 |
| H | -2.60903654128143 | 5.81376866815771  | -8.69385346395143  |
| C | -3.03286328292331 | 5.10207218971254  | -5.61058288961624  |
| C | -1.41004184798757 | 3.56223881778797  | -5.99023005068487  |
| H | -3.66264077988465 | 5.26292912087466  | -10.89090277655550 |
| C | -2.32645655469671 | 4.93912716966006  | -4.38953806200235  |
| C | -4.11513183679106 | 5.97569836745094  | -5.73464362018678  |
| C | -1.29497573059485 | 3.94836693920074  | -4.63048524048449  |
| C | -0.54172019750922 | 2.63553839467688  | -6.56950167941677  |
| C | -2.72698685279002 | 5.66576517725240  | -3.26520085440989  |
| C | -4.48275605765323 | 6.69870892357892  | -4.60239874812865  |
| H | -4.66411430682945 | 6.05110535959532  | -6.66551819169851  |
| C | -0.32490041097422 | 3.34559025246158  | -3.82656650419199  |

|   |                   |                   |                   |
|---|-------------------|-------------------|-------------------|
| C | 0.42049104623993  | 2.04741228203003  | -5.74666834393630 |
| H | -0.62978543851084 | 2.36794595338839  | -7.61596841624369 |
| H | -2.21482643999398 | 5.53844449505517  | -2.31651628611343 |
| C | -3.80311569138428 | 6.54491322213054  | -3.38024867328224 |
| H | -5.32300079392576 | 7.38357755755776  | -4.66238911068911 |
| C | 0.52039102062112  | 2.38520982149097  | -4.38773551247360 |
| H | -0.24029490603555 | 3.60987459162851  | -2.77685132687832 |
| H | 1.08747497739720  | 1.30182625195133  | -6.16793760539305 |
| H | -4.12713792183968 | 7.11241608007161  | -2.51377158792584 |
| H | 1.26556285821846  | 1.89714977151139  | -3.76769943567160 |
| C | -2.63438366538735 | -0.73612270374890 | -0.90733351464142 |
| C | -2.09343649002508 | -0.42115875289749 | 0.34129593446260  |
| C | -3.25243270302428 | -1.99568471982394 | -1.07488562463402 |
| C | -2.10977576309627 | -1.35476301029323 | 1.37818340245945  |
| H | -1.62945974188761 | 0.54996356470996  | 0.48152945489382  |
| C | -3.26550045534674 | -2.93139152407570 | -0.04190007636725 |
| N | -3.86296264306799 | -2.31275576342505 | -2.33193054643132 |
| C | -2.68357048980845 | -2.61332329924075 | 1.18620620875348  |
| H | -1.66587303160023 | -1.10168118367140 | 2.33629212888373  |
| H | -3.74688271980476 | -3.89051693950233 | -0.20428030137385 |
| C | -4.94589478011554 | -1.63903950482787 | -2.90796182070202 |
| C | -3.32300709088749 | -3.17886445117853 | -3.28739605627272 |
| H | -2.69369718916786 | -3.33954275456583 | 1.99292203985267  |
| C | -5.06093110261249 | -2.02534506381029 | -4.26765434138245 |
| C | -5.81429939433198 | -0.71234204782245 | -2.32880937878012 |
| C | -4.02940615090520 | -3.01609463075790 | -4.50846912727026 |
| C | -2.24069543364801 | -4.05242277920461 | -3.16322703281532 |
| C | -6.03102788603304 | -1.42274047810604 | -5.07166901524451 |
| C | -6.77653843528640 | -0.12439005648356 | -3.15173720767757 |

|   |                   |                   |                   |
|---|-------------------|-------------------|-------------------|
| H | -5.72630314212191 | -0.44462176198950 | -1.28237129207642 |
| C | -3.62884380847900 | -3.74284262972023 | -5.63271744187987 |
| C | -1.87304747006420 | -4.77556722944981 | -4.29538118522309 |
| H | -1.69170351352754 | -4.12769596818241 | -2.23234799109489 |
| H | -6.11557846866374 | -1.68719835135435 | -6.12134420810494 |
| C | -6.87639130325125 | -0.46234544827260 | -4.51063292822850 |
| H | -7.44360762611383 | 0.62117886226209  | -2.73057183147778 |
| C | -2.55268414582949 | -4.62194444746617 | -5.51755402368221 |
| H | -4.14102198987901 | -3.61562500072062 | -6.58140679180145 |
| H | -1.03277396365317 | -5.46039307118486 | -4.23529147161507 |
| H | -7.62159220668071 | 0.02559802359275  | -5.13072537758160 |
| H | -2.22863867869518 | -5.18954818417185 | -6.38395668137035 |

**XYZ Coordinates of *m*Cz2 in S<sub>0</sub> optimized geometry**

|   |           |           |           |
|---|-----------|-----------|-----------|
| N | 0.994281  | -0.044282 | 0.518987  |
| C | -0.324887 | -0.361658 | 0.867815  |
| C | -1.312426 | -0.387872 | -0.250984 |
| C | -0.974111 | 0.284966  | -1.462817 |
| C | 0.341835  | 0.781183  | -1.700988 |
| C | 1.413747  | 0.390022  | -0.742483 |
| C | -2.587558 | -0.952447 | -0.086807 |
| C | 0.621833  | 1.526143  | -2.857498 |
| O | -0.621791 | -0.595929 | 2.030391  |
| O | 2.608761  | 0.442639  | -0.994928 |
| C | -1.973704 | 0.465517  | -2.457448 |
| C | -1.665517 | 1.172457  | -3.640879 |
| C | -2.699909 | 1.383183  | -4.691821 |
| N | -3.966164 | 0.831295  | -4.441898 |
| C | -4.322609 | 0.119290  | -3.288922 |
| C | -3.268876 | -0.059984 | -2.254423 |

|   |           |           |           |
|---|-----------|-----------|-----------|
| C | -3.554703 | -0.766323 | -1.105686 |
| H | -4.543029 | -1.198447 | -0.994704 |
| O | -5.454548 | -0.323493 | -3.160933 |
| O | -2.462229 | 2.001998  | -5.718306 |
| C | -0.405209 | 1.702154  | -3.818546 |
| H | -0.210837 | 2.282614  | -4.713362 |
| C | -5.023627 | 1.001931  | -5.446913 |
| H | -5.384774 | 0.022409  | -5.765959 |
| H | -5.860637 | 1.549793  | -5.009119 |
| H | -4.604762 | 1.550417  | -6.286525 |
| C | 2.050666  | -0.197655 | 1.529840  |
| H | 2.745747  | -0.979912 | 1.218021  |
| H | 2.599873  | 0.741088  | 1.624658  |
| H | 1.578077  | -0.455494 | 2.473690  |
| C | -2.985613 | -1.805393 | 1.064492  |
| C | -4.178396 | -1.557409 | 1.756873  |
| C | -2.216990 | -2.923490 | 1.406553  |
| C | -4.568008 | -2.395673 | 2.802670  |
| H | -4.785224 | -0.696517 | 1.493613  |
| C | -2.595611 | -3.748755 | 2.464950  |
| H | -1.310850 | -3.150498 | 0.856552  |
| C | -3.777552 | -3.481981 | 3.170714  |
| H | -5.483102 | -2.187374 | 3.348351  |
| N | -1.770651 | -4.840656 | 2.827224  |
| H | -4.056058 | -4.118241 | 4.003731  |
| C | -0.391259 | -4.768843 | 3.066100  |
| C | -2.175424 | -6.173851 | 2.958537  |
| C | 0.091302  | -6.070515 | 3.352806  |
| C | 0.446934  | -3.650028 | 3.085120  |

|   |           |           |           |
|---|-----------|-----------|-----------|
| C | -1.044562 | -6.965505 | 3.286127  |
| C | -3.439924 | -6.740952 | 2.779398  |
| C | 1.449590  | -6.255376 | 3.635570  |
| C | 1.794957  | -3.864237 | 3.367508  |
| H | 0.062835  | -2.652736 | 2.902353  |
| C | -1.195416 | -8.345432 | 3.460627  |
| C | -3.562655 | -8.117961 | 2.957320  |
| H | -4.294536 | -6.132721 | 2.504587  |
| C | 2.297166  | -5.150781 | 3.633990  |
| H | 1.832436  | -7.247750 | 3.856281  |
| H | 2.470095  | -3.013116 | 3.387073  |
| C | -2.455924 | -8.914949 | 3.299288  |
| H | -0.337250 | -8.961273 | 3.714171  |
| H | -4.535399 | -8.582640 | 2.825308  |
| H | 3.353717  | -5.280395 | 3.847950  |
| H | -2.587285 | -9.984266 | 3.433567  |
| C | 1.908540  | 2.223399  | -3.122659 |
| C | 2.522734  | 2.130279  | -4.379700 |
| C | 2.464516  | 3.069614  | -2.156042 |
| C | 3.688288  | 2.849711  | -4.648288 |
| H | 2.099988  | 1.479233  | -5.138668 |
| C | 3.639839  | 3.772021  | -2.417847 |
| H | 1.988127  | 3.182572  | -1.189000 |
| C | 4.257609  | 3.663249  | -3.671271 |
| H | 4.165135  | 2.760639  | -5.619429 |
| N | 4.204832  | 4.585396  | -1.405263 |
| H | 5.177857  | 4.205626  | -3.860200 |
| C | 4.510968  | 4.163928  | -0.105557 |
| C | 4.482603  | 5.952161  | -1.507260 |

|   |          |          |           |
|---|----------|----------|-----------|
| C | 4.990320 | 5.274492 | 0.634100  |
| C | 4.436340 | 2.882005 | 0.447352  |
| C | 4.972297 | 6.414430 | -0.258483 |
| C | 4.309248 | 6.812978 | -2.593797 |
| C | 5.375728 | 5.097886 | 1.968363  |
| C | 4.830710 | 2.736163 | 1.776677  |
| H | 4.093807 | 2.032983 | -0.133614 |
| C | 5.310782 | 7.763989 | -0.108850 |
| C | 4.653257 | 8.152122 | -2.417755 |
| H | 3.915106 | 6.452137 | -3.537557 |
| C | 5.288590 | 3.829187 | 2.535041  |
| H | 5.742597 | 5.940159 | 2.547963  |
| H | 4.794802 | 1.750180 | 2.231804  |
| C | 5.152310 | 8.625748 | -1.191256 |
| H | 5.687599 | 8.131258 | 0.841506  |
| H | 4.529794 | 8.842909 | -3.246717 |
| H | 5.585281 | 3.677665 | 3.568420  |
| H | 5.411706 | 9.675001 | -1.088732 |

**XYZ Coordinates of *mCz2* in  $S_1$  optimized geometry**

|   |                   |                   |                   |
|---|-------------------|-------------------|-------------------|
| N | 1.15483672479213  | -0.10336896806299 | 0.45186685344423  |
| C | -0.10819782037897 | -0.60215627202195 | 0.76752586693130  |
| C | -1.13023822577261 | -0.49163842877277 | -0.27088184976039 |
| C | -0.82963662129501 | 0.23110583908372  | -1.46802654756443 |
| C | 0.46323729213600  | 0.78085586041782  | -1.71543711470360 |
| C | 1.54051612943153  | 0.45687633500006  | -0.78509907104034 |
| C | -2.43670685515325 | -1.04556827429555 | -0.09399634064918 |
| C | 0.70400040864365  | 1.55274567226340  | -2.89392832049456 |
| O | -0.30039723471820 | -1.11566511465084 | 1.88715050990344  |
| O | 2.74414444749434  | 0.63790846766088  | -0.98478595096312 |

|   |                   |                   |                   |
|---|-------------------|-------------------|-------------------|
| C | -1.85786968924414 | 0.40366315871675  | -2.45444116205630 |
| C | -1.57895652464898 | 1.12127940619282  | -3.64142772896002 |
| C | -2.61130956166261 | 1.31100066220992  | -4.66633014002739 |
| N | -3.86880885347289 | 0.73611081855504  | -4.39360526902075 |
| C | -4.19826893556617 | 0.01321381757162  | -3.23928950205630 |
| C | -3.13994386152857 | -0.14470530827990 | -2.23983783474788 |
| C | -3.40732629215012 | -0.86220169718929 | -1.06566573232864 |
| H | -4.39802163928764 | -1.28703993100691 | -0.94989754368031 |
| O | -5.33332092185438 | -0.45339999750991 | -3.10618487864852 |
| O | -2.41263461667741 | 1.93190232616582  | -5.71173380246353 |
| C | -0.31668266155365 | 1.69287539507058  | -3.83091944267832 |
| H | -0.16164117514909 | 2.28999289085451  | -4.72219316864494 |
| C | -4.93894729806635 | 0.89136644643867  | -5.37967598803350 |
| H | -5.27812257910105 | -0.09162275193822 | -5.71494436659245 |
| H | -5.79039315840715 | 1.40164282573332  | -4.92327619591728 |
| H | -4.54471713511680 | 1.46848046838093  | -6.21244122656590 |
| C | 2.22829121637189  | -0.22769554530725 | 1.43980564089585  |
| H | 2.95858954929685  | -0.97508627541714 | 1.11649818633303  |
| H | 2.74623690832289  | 0.72871564004765  | 1.52907915533814  |
| H | 1.78065940283734  | -0.51079982286231 | 2.38876850924596  |
| C | -2.83847057646489 | -1.86048796531148 | 1.09355011308286  |
| C | -3.92469692308293 | -1.48095131626591 | 1.88847414914736  |
| C | -2.19136706656338 | -3.06345214867071 | 1.39255317842924  |
| C | -4.34669728465801 | -2.26217276466170 | 2.97046830041653  |
| H | -4.43841998110888 | -0.55311808426345 | 1.66058370250912  |
| C | -2.59524456462912 | -3.81494032156898 | 2.48897827981048  |
| H | -1.35696408851614 | -3.39066686356450 | 0.78434883453426  |
| C | -3.67767635500194 | -3.43690231984472 | 3.29273468988266  |
| H | -5.18544467152835 | -1.93750162668582 | 3.57759202784601  |



|   |                   |                   |                   |
|---|-------------------|-------------------|-------------------|
| N | -1.84292753038678 | -4.99127789611337 | 2.83016858988636  |
| H | -3.95418232040503 | -4.02937323038701 | 4.15815801389164  |
| C | -0.48490304816151 | -5.01320182463545 | 3.07100227166236  |
| C | -2.36374476073583 | -6.27076881642285 | 2.98681810568751  |
| C | -0.09606836260804 | -6.34742529577614 | 3.39346840606931  |
| C | 0.42087098063854  | -3.93476240107786 | 3.04807068150185  |
| C | -1.31017037141881 | -7.15552743814326 | 3.34109839682400  |
| C | -3.68142532813049 | -6.70337217685743 | 2.80474358299685  |
| C | 1.22914810787390  | -6.61276349823991 | 3.68060906570233  |
| C | 1.75100264414343  | -4.23633454887953 | 3.33181205281515  |
| H | 0.10698130746323  | -2.92301497865795 | 2.80619501137596  |
| C | -1.58810779020619 | -8.49805955468285 | 3.53714253147286  |
| C | -3.94031980650401 | -8.05970767929484 | 3.01098240887500  |
| H | -4.46000306178153 | -6.01035289673301 | 2.51143565902973  |
| C | 2.15262701417234  | -5.54384068909985 | 3.64179772458294  |
| H | 1.56007682791770  | -7.61461550710098 | 3.93268311612249  |
| H | 2.48527089889426  | -3.43964520949639 | 3.31312738152870  |
| C | -2.91529539828564 | -8.94221157545471 | 3.37420998891937  |
| H | -0.80383611292292 | -9.19830632253898 | 3.80458308498899  |
| H | -4.94946964277258 | -8.43394082031742 | 2.88161945933754  |
| H | 3.19586611524809  | -5.74239907668800 | 3.86231036660130  |
| H | -3.14447708735171 | -9.99134413305961 | 3.52606559165205  |
| C | 1.96006669005644  | 2.31036976779615  | -3.14938382045795 |
| C | 2.59424706970677  | 2.23856340181828  | -4.39742898849832 |
| C | 2.47322628815378  | 3.19050923391360  | -2.18798221849368 |
| C | 3.72820250737980  | 3.00792973743936  | -4.66543764306037 |
| H | 2.20294303963409  | 1.56500997655467  | -5.15346151062883 |
| C | 3.61940708674852  | 3.93836619884590  | -2.44603459735884 |
| H | 1.98668221386631  | 3.28416498100293  | -1.22422028113657 |

|   |                  |                  |                   |
|---|------------------|------------------|-------------------|
| C | 4.25646549011342 | 3.85101476244148 | -3.69099384270867 |
| H | 4.21407303128510 | 2.93329990024025 | -5.63380013350748 |
| N | 4.14784804229173 | 4.78098555876298 | -1.42959602075266 |
| H | 5.15555010109561 | 4.42990336423331 | -3.87380360428956 |
| C | 4.49522791362225 | 4.37179223961607 | -0.13897809634231 |
| C | 4.39517428805406 | 6.14916828919074 | -1.54292494646111 |
| C | 4.96994151409799 | 5.49498218656255 | 0.58689914790875  |
| C | 4.45304070946740 | 3.09107527146701 | 0.42180087446512  |
| C | 4.90641735749772 | 6.62978367870451 | -0.30841556484315 |
| C | 4.18156555978918 | 7.00153707050239 | -2.63011492776252 |
| C | 5.39029288705142 | 5.33124934152384 | 1.91235550266256  |
| C | 4.88028289644995 | 2.96021650631328 | 1.74193400802882  |
| H | 4.10035448615299 | 2.23593179846430 | -0.14425218096299 |
| C | 5.22276125719480 | 7.98653101723694 | -0.17500337943905 |
| C | 4.50430265482845 | 8.34741977744429 | -2.46982674339313 |
| H | 3.77437247381318 | 6.62459883060720 | -3.56180762135884 |
| C | 5.33958166049753 | 4.06361958111032 | 2.48545611107560  |
| H | 5.75447799542083 | 6.18315928691405 | 2.47998346907485  |
| H | 4.86397260714226 | 1.97631434417518 | 2.20360112661450  |
| C | 5.02300536562410 | 8.83883017950827 | -1.25791157680505 |
| H | 5.61531973084170 | 8.36646113227805 | 0.76420737947299  |
| H | 4.34834494054784 | 9.03063039577688 | -3.29978548450146 |
| H | 5.66263304716051 | 3.92220034336751 | 3.51271281650362  |
| H | 5.26548291276593 | 9.89344218363392 | -1.16770956472138 |

**XYZ Coordinates of *mCz2* in  $T_1$  optimized geometry**

|   |                   |                   |                   |
|---|-------------------|-------------------|-------------------|
| N | 0.94235432173984  | -0.04153707085385 | 0.56239677184207  |
| C | -0.37251381114450 | -0.39835142999840 | 0.89427113654401  |
| C | -1.34216075807117 | -0.38502498831473 | -0.20450804074156 |
| C | -0.99756568776526 | 0.28936566353497  | -1.40962631539366 |

|   |                   |                   |                   |
|---|-------------------|-------------------|-------------------|
| C | 0.32243116891488  | 0.77185722251784  | -1.64874769924263 |
| C | 1.36952000444448  | 0.42984057727650  | -0.68482628164232 |
| C | -2.67161603582580 | -0.93847846170681 | -0.04000910432506 |
| C | 0.61863126217087  | 1.50884480063974  | -2.85029252241800 |
| O | -0.65434921877279 | -0.70609065208734 | 2.05837057169264  |
| O | 2.58190102621796  | 0.55480286643227  | -0.89052635495911 |
| C | -2.00410006477475 | 0.48517698276648  | -2.41196439099201 |
| C | -1.67987781731938 | 1.15612571580736  | -3.60447703568673 |
| C | -2.69552718664477 | 1.38283750263810  | -4.64326558091790 |
| N | -3.98118759645880 | 0.88329933167990  | -4.37540472596455 |
| C | -4.35793924206940 | 0.20232280854247  | -3.20840120305234 |
| C | -3.31656625105666 | 0.00789693568708  | -2.19260611910522 |
| C | -3.62139426535595 | -0.70609915449465 | -1.02147888570173 |
| H | -4.61819182468626 | -1.12411595436735 | -0.93568140092340 |
| O | -5.51416187925415 | -0.19837300272858 | -3.07304027830605 |
| O | -2.44419545644644 | 1.97524871540779  | -5.69249547915153 |
| C | -0.37835455253095 | 1.66394405631680  | -3.79892823749092 |
| H | -0.19327048063490 | 2.22955384366765  | -4.70500387121136 |
| C | -5.03485094684716 | 1.07472459639562  | -5.37600110468833 |
| H | -5.42900731106351 | 0.10388076205852  | -5.68422541920141 |
| H | -5.85551565740861 | 1.64997444641449  | -4.94135556650696 |
| H | -4.60196054218396 | 1.60203934995778  | -6.22237919881380 |
| C | 1.98723421907117  | -0.18238768145643 | 1.58118180757822  |
| H | 2.71853272259850  | -0.92835807699015 | 1.26131263927218  |
| H | 2.50402306823126  | 0.77133222011073  | 1.70845615578052  |
| H | 1.51032260305877  | -0.47921598573804 | 2.51151094665702  |
| C | -3.05016562989856 | -1.83727150166055 | 1.07429279462021  |
| C | -4.26692454284799 | -1.65979237402508 | 1.75600791488418  |
| C | -2.25010399029642 | -2.93731005302734 | 1.40837513077764  |

|   |                   |                    |                   |
|---|-------------------|--------------------|-------------------|
| C | -4.65829114241731 | -2.54468546176795  | 2.76202827328262  |
| H | -4.89228782035397 | -0.80805309509429  | 1.50867920846559  |
| C | -2.63232493168227 | -3.80794627740567  | 2.42567611077957  |
| H | -1.32371737315272 | -3.11467059677530  | 0.87536778747902  |
| C | -3.84312054308410 | -3.61685117273435  | 3.11307701810963  |
| H | -5.59212141928053 | -2.38263572368609  | 3.29120243161409  |
| N | -1.77495429345984 | -4.87754542224555  | 2.78801505546146  |
| H | -4.11107319054985 | -4.28506207761157  | 3.92417043663292  |
| C | -0.41018273853847 | -4.75923721585918  | 3.07375475499006  |
| C | -2.13841431334245 | -6.22277556098204  | 2.88591599513974  |
| C | 0.10969832592557  | -6.04760435991794  | 3.36120271504880  |
| C | 0.37933447124340  | -3.60543844492570  | 3.13616116413245  |
| C | -0.99395874976030 | -6.98251060844192  | 3.24423988048960  |
| C | -3.37768863905344 | -6.82403824069850  | 2.64566406791090  |
| C | 1.45865813251751  | -6.18600228574038  | 3.68815445738685  |
| C | 1.72589819840799  | -3.77516180819393  | 3.45784339969595  |
| H | -0.03457567904592 | -2.62056172627315  | 2.94726218611030  |
| C | -1.10615891285795 | -8.36469481551597  | 3.39403731143010  |
| C | -3.46445566578307 | -8.20665872312254  | 2.80372508294516  |
| H | -4.23548900946011 | -6.23717457217305  | 2.33814611309379  |
| C | 2.26401684293668  | -5.04437221461105  | 3.72678295130624  |
| H | 1.87404228717412  | -7.16420351610169  | 3.91162597498509  |
| H | 2.36794077916265  | -2.90081459900479  | 3.50544502859724  |
| C | -2.34639321430440 | -8.97023327494387  | 3.17789665391127  |
| H | -0.24047389296958 | -8.96019004328044  | 3.66831282409615  |
| H | -4.41460429641588 | -8.70082333693802  | 2.62626386956230  |
| H | 3.31649710286483  | -5.13853045490375  | 3.97568495247902  |
| H | -2.44690958966565 | -10.04506493798360 | 3.29156294244399  |
| C | 1.91089488226048  | 2.20037262368335   | -3.10488922262548 |

|   |                  |                  |                   |
|---|------------------|------------------|-------------------|
| C | 2.53928129152373 | 2.09809920141181 | -4.35374405554739 |
| C | 2.47078197066777 | 3.05346273913102 | -2.14324742897888 |
| C | 3.70790381417431 | 2.81338306389149 | -4.62614916565254 |
| H | 2.11901867048723 | 1.44017919293997 | -5.10765805227606 |
| C | 3.64569215901663 | 3.75463780178934 | -2.41271542616388 |
| H | 1.98816354842547 | 3.17903578504849 | -1.18162244943354 |
| C | 4.27517951243031 | 3.63875510042374 | -3.65971313001394 |
| H | 4.19101381428275 | 2.70761155477980 | -5.59266416624428 |
| N | 4.20173574743659 | 4.59083348346385 | -1.40768942267139 |
| H | 5.20004178519857 | 4.17304184348892 | -3.84821167187281 |
| C | 4.50013928472405 | 4.19914256528767 | -0.09976775662660 |
| C | 4.53626370314475 | 5.93822244962730 | -1.55941645192699 |
| C | 5.03152958973018 | 5.31317059182494 | 0.60138412808965  |
| C | 4.37315401742266 | 2.93773406131718 | 0.49355495406544  |
| C | 5.05393889316072 | 6.42429516073580 | -0.33035947911625 |
| C | 4.38290513779300 | 6.76745309039362 | -2.67466367926978 |
| C | 5.41984258453743 | 5.16504871435366 | 1.93375992752779  |
| C | 4.77144739735926 | 2.81972123128615 | 1.82451029361171  |
| H | 3.98033781644288 | 2.08715488217037 | -0.05295917643535 |
| C | 5.44282340354440 | 7.76081016896069 | -0.22873521448642 |
| C | 4.77929726141538 | 8.09800507027976 | -2.54789006238821 |
| H | 3.96448032215308 | 6.38881901367563 | -3.60013342501243 |
| C | 5.28224676082934 | 3.91536539474960 | 2.54169130939004  |
| H | 5.82760556602034 | 6.00725683196112 | 2.48496335531962  |
| H | 4.69028840742812 | 1.85337449941681 | 2.31341532558292  |
| C | 5.30730545358320 | 8.59145079748183 | -1.34301639438825 |
| H | 5.83961239895038 | 8.14835605849430 | 0.70500381234160  |
| H | 4.67326655688139 | 8.76478449759079 | -3.39810327411110 |
| H | 5.57961654256508 | 3.78610361200041 | 3.57779308836628  |

H 5.60741733426594 9.63260647487007 -1.27741878984545

**XYZ Coordinates of *mCz2i* in  $S_0$  optimized geometry**

|   |                   |                   |                   |
|---|-------------------|-------------------|-------------------|
| N | -0.92443724736618 | 2.07122688120025  | 0.27349139082180  |
| C | -1.90915715407825 | 1.08512226657544  | 0.43379332407500  |
| C | -2.50531308028618 | 0.49778437646465  | -0.80275254028229 |
| C | -2.32818549451117 | 1.20673249779342  | -2.02321305299807 |
| C | -1.43930707523243 | 2.30639602377503  | -2.10289530416469 |
| C | -0.64465803241594 | 2.73858354359977  | -0.92348046416387 |
| C | -3.29848182782788 | -0.65874601027438 | -0.77213420369931 |
| C | -1.26105093577598 | 2.97043738450895  | -3.29780343656039 |
| O | -2.24011226718786 | 0.75501200188731  | 1.56303124099793  |
| O | 0.18999037441608  | 3.62954827288643  | -0.98616021359281 |
| H | -0.54127906902950 | 3.78080004219364  | -3.32615518823941 |
| C | -3.02636752467926 | 0.82538361678360  | -3.20295638239009 |
| C | -2.86440017567837 | 1.54834054182096  | -4.41935606126625 |
| C | -3.73845468712956 | 1.18808817094466  | -5.57685023951673 |
| N | -4.53383584088839 | 0.03475745178845  | -5.45762986204761 |
| C | -4.66253077683622 | -0.75089752070433 | -4.30879953435679 |
| C | -3.88293800807400 | -0.30037699915636 | -3.12702938259577 |
| C | -3.98592315855035 | -1.02346830996693 | -1.95610500702250 |
| H | -4.60546524503159 | -1.91333649573525 | -1.96276573791102 |
| O | -5.38481821383194 | -1.73733656650923 | -4.27760964063559 |
| O | -3.80310268932806 | 1.84286271287352  | -6.60531896304918 |
| C | -1.95797154676557 | 2.61604683764896  | -4.48028358987812 |
| C | -5.33758698529875 | -0.30905739930784 | -6.63821546618161 |
| H | -5.84977194058389 | -1.24552925801961 | -6.43346661114940 |
| H | -6.05833515151667 | 0.48623302380585  | -6.84013858311390 |
| H | -4.68419089612189 | -0.40571844557244 | -7.50689622485068 |
| C | -0.24749157069686 | 2.50789306446480  | 1.50249805112352  |

|   |                   |                   |                  |
|---|-------------------|-------------------|------------------|
| H | 0.18754953272685  | 1.63857756672588  | 1.99945975609977 |
| H | 0.52539831346366  | 3.21905079814342  | 1.22271680679649 |
| H | -0.96682559491382 | 2.97188548796606  | 2.18062718821886 |
| C | -3.41790537504725 | -1.57916144199309 | 0.38909865785884 |
| C | -4.67268934129301 | -2.06220861734538 | 0.78728773098764 |
| C | -2.27079331692466 | -2.05421524603313 | 1.03667554191472 |
| C | -4.77394572284941 | -2.97888888726296 | 1.83500552885591 |
| H | -5.56996141626405 | -1.70328843194790 | 0.29261194053270 |
| C | -2.37385872157168 | -2.95271830545689 | 2.09753409638828 |
| H | -1.28837260822680 | -1.71913618583823 | 0.72511594571097 |
| C | -3.63273254602374 | -3.41995977943444 | 2.50071828729738 |
| H | -5.75093642423984 | -3.33504167738775 | 2.14653559960708 |
| N | -1.20097272829438 | -3.37547472036528 | 2.77022202486484 |
| H | -3.70208596445993 | -4.10971412190857 | 3.33500284123025 |
| C | -0.23811679287680 | -2.52665968887551 | 3.33180870951256 |
| C | -0.79157150013727 | -4.69927675481022 | 2.95988344645120 |
| C | 0.80199444902451  | -3.31675806602695 | 3.88300311320202 |
| C | -0.23731740916615 | -1.13194753194231 | 3.42689045996578 |
| C | 0.45060017721942  | -4.70096495857336 | 3.64560920064935 |
| C | -1.40717960211006 | -5.88543384769319 | 2.55237179011376 |
| C | 1.88029108768260  | -2.68976580789664 | 4.51860512790182 |
| C | 0.84736994893431  | -0.53576148245997 | 4.06864453314399 |
| H | -1.04989398742495 | -0.53570562627748 | 3.02811454035278 |
| C | 1.07245351376958  | -5.91887846486506 | 3.94169148400536 |
| C | -0.76678152830544 | -7.08464570243661 | 2.86003190924560 |
| H | -2.34696239697346 | -5.87192807213646 | 2.01116233475690 |
| C | 1.90022766120448  | -1.30028129399024 | 4.60349731463949 |
| H | 2.68459841291514  | -3.28283433681004 | 4.94457844295504 |
| H | 0.87090432554664  | 0.54607848268660  | 4.16812113535458 |

|   |                   |                   |                   |
|---|-------------------|-------------------|-------------------|
| C | 0.45845899267976  | -7.10578180301423 | 3.54988756916412  |
| H | 2.02304698859536  | -5.93401592819856 | 4.46728880338468  |
| H | -1.22505817544689 | -8.02140989859185 | 2.55663947062969  |
| H | 2.72960034352584  | -0.80100800326707 | 5.09518355384524  |
| H | 0.92954136834565  | -8.05768150525284 | 3.77502962405046  |
| C | -1.61364638035116 | 3.40904792384780  | -5.69326467971364 |
| C | -1.10704898825874 | 2.80352462288425  | -6.85218596849919 |
| C | -1.69635724515490 | 4.80389144417231  | -5.63136151474301 |
| C | -0.69334039457982 | 3.58704273136479  | -7.92509002700308 |
| H | -1.04159184969868 | 1.72264586373053  | -6.90726829476442 |
| C | -1.27561927310174 | 5.59119880145969  | -6.70933006785870 |
| H | -2.10240549157529 | 5.28914789351744  | -4.75029395809775 |
| C | -0.76614059572402 | 4.97960978558602  | -7.85934410298132 |
| H | -0.29391978333240 | 3.11287625004249  | -8.81624523642419 |
| N | -1.35708906538359 | 7.00228333845259  | -6.62129670547637 |
| H | -0.41969853954391 | 5.59567838722980  | -8.68208624443377 |
| C | -0.85023674949358 | 7.78485350752623  | -5.57621586721065 |
| C | -1.98100281714099 | 7.84792653748098  | -7.54667125093357 |
| C | -1.14962685055242 | 9.14639035507128  | -5.83645074470923 |
| C | -0.12471137120192 | 7.39807126000302  | -4.44592743326922 |
| C | -1.87020391647484 | 9.18646565931511  | -7.09113628119815 |
| C | -2.66115398212973 | 7.52827542962330  | -8.72471685141576 |
| C | -0.73200278060070 | 10.13006802652013 | -4.93315592209298 |
| C | 0.27982642431024  | 8.39665439358868  | -3.56198850002502 |
| H | 0.12410311752843  | 6.35834367765248  | -4.26511684094826 |
| C | -2.43296906013242 | 10.22163168790727 | -7.84571355877639 |
| C | -3.21369036672067 | 8.57766779726551  | -9.45702201860073 |
| H | -2.76362177280655 | 6.49971358991500  | -9.05229966422355 |
| H | -0.95691651430827 | 11.17599731397353 | -5.12154492368348 |



|   |                   |                   |                    |
|---|-------------------|-------------------|--------------------|
| C | -0.02275374352299 | 9.74955926097913  | -3.79689867973669  |
| H | 0.84213321575731  | 8.11928104000729  | -2.67534920304094  |
| C | -3.09900607021560 | 9.91200449281845  | -9.02864425437620  |
| H | -2.35332126794870 | 11.25064958515114 | -7.50694414827882  |
| H | -3.74696014524609 | 8.35591653884272  | -10.37681727449481 |
| H | 0.30448732618407  | 10.50262893700614 | -3.08661987799424  |
| H | -3.53934589135776 | 10.70552869386562 | -9.62457163203604  |

**XYZ Coordinates of *mCz2i* in S<sub>1</sub> optimized geometry**

|   |                   |                   |                   |
|---|-------------------|-------------------|-------------------|
| N | -0.86862574338815 | 2.21800422079546  | 0.29605100401997  |
| C | -1.62774845992339 | 1.05401103225340  | 0.42166042749729  |
| C | -2.28683860192173 | 0.53803883818656  | -0.77742445114112 |
| C | -2.16396103049870 | 1.27391077228824  | -1.99338899113398 |
| C | -1.38141349163184 | 2.45113597939570  | -2.06315363408913 |
| C | -0.67887901706305 | 2.95978656248793  | -0.89262722538923 |
| C | -3.08321975265398 | -0.64708848397958 | -0.76207761989329 |
| C | -1.24540193741110 | 3.14054105899603  | -3.27632263934221 |
| O | -1.69903118926713 | 0.52456467575884  | 1.54797640145881  |
| O | 0.03535506511880  | 3.96376394756879  | -0.89493879420101 |
| H | -0.59666999673949 | 4.00880245619197  | -3.28494146519922 |
| C | -2.84069801951156 | 0.84722295319289  | -3.18653122666779 |
| C | -2.71615937109147 | 1.58161898618078  | -4.40236860560679 |
| C | -3.52968545922065 | 1.17091820844662  | -5.55761828449177 |
| N | -4.27346480870527 | -0.02009135346153 | -5.43352790734897 |
| C | -4.38046969300164 | -0.80542248129666 | -4.28018197467060 |
| C | -3.64120501078761 | -0.31743313106135 | -3.11657846406847 |
| C | -3.74080926797725 | -1.03916212057998 | -1.91668154635107 |
| H | -4.34754532019742 | -1.93755093523201 | -1.93013169846794 |
| O | -5.06685092623392 | -1.83221844348356 | -4.26001665014529 |
| O | -3.60680143251652 | 1.79518023026464  | -6.61638620646486 |

|   |                   |                   |                   |
|---|-------------------|-------------------|-------------------|
| C | -1.87723887375426 | 2.73098984005394  | -4.44777545375950 |
| C | -5.03715168020639 | -0.41262912426395 | -6.61924603757936 |
| H | -5.52244909577206 | -1.36121602442459 | -6.40338051545698 |
| H | -5.77775757913140 | 0.35484750789056  | -6.85679397468041 |
| H | -4.36529379477954 | -0.50259089997649 | -7.47546138105209 |
| C | -0.22256481771598 | 2.70227956356989  | 1.51495838821716  |
| H | 0.53368281869589  | 1.98589529169416  | 1.85044932069634  |
| H | 0.24573178273369  | 3.65594307807560  | 1.28397124951291  |
| H | -0.96465224290849 | 2.81017326643804  | 2.30816212099380  |
| C | -3.25630065455470 | -1.52580114275587 | 0.43434297382436  |
| C | -4.53312872362967 | -1.81692707605037 | 0.92598443323421  |
| C | -2.15882865679183 | -2.14042891856075 | 1.04659338599052  |
| C | -4.72069690257007 | -2.68037615987501 | 2.01149631383492  |
| H | -5.39138385313139 | -1.34974133591849 | 0.45492861218131  |
| C | -2.35256791386785 | -2.97300664665992 | 2.14169059955063  |
| H | -1.15886279680696 | -1.94386752324265 | 0.68078258755095  |
| C | -3.62807100169204 | -3.26354103068208 | 2.64148083964244  |
| H | -5.72245824360815 | -2.87865469239369 | 2.37846030462965  |
| N | -1.19973548538770 | -3.51936438216344 | 2.80574753330524  |
| H | -3.74643254559289 | -3.89654015340798 | 3.51430308987473  |
| C | -0.16500171863742 | -2.77480730631332 | 3.33323028941132  |
| C | -0.96704887466552 | -4.86963465194627 | 3.03992701324115  |
| C | 0.77892966546647  | -3.65992474723069 | 3.93447068843760  |
| C | -0.01357238928496 | -1.37469215891097 | 3.33796469905777  |
| C | 0.25834823435063  | -5.00990982860146 | 3.74487960062806  |
| C | -1.73959067340661 | -5.96746639800083 | 2.64639635865753  |
| C | 1.90338593498945  | -3.13563283950766 | 4.54233125138060  |
| C | 1.13387475505151  | -0.87753362039245 | 3.95220514119990  |
| H | -0.73650630694307 | -0.71351297414882 | 2.86880707935731  |

|   |                   |                   |                   |
|---|-------------------|-------------------|-------------------|
| C | 0.70775183575751  | -6.27625373702447 | 4.07965641366666  |
| C | -1.27027332301962 | -7.23464671874776 | 2.99717820234916  |
| H | -2.65814763003340 | -5.83105980274410 | 2.08948473706325  |
| C | 2.07518700312811  | -1.73301899384409 | 4.54268182968125  |
| H | 2.63977623321700  | -3.77847788754650 | 5.01268872881125  |
| H | 1.29626681020013  | 0.19365512924805  | 3.97113901607491  |
| C | -0.07086287237289 | -7.38887592206422 | 3.70366041162854  |
| H | 1.64119952692029  | -6.41534887554366 | 4.61472143056625  |
| H | -1.84119342595689 | -8.11091152986475 | 2.71196173973181  |
| H | 2.95605554975820  | -1.31166167714454 | 5.01487730301402  |
| H | 0.27147599109422  | -8.38521898223456 | 3.96129686134354  |
| C | -1.56258669656150 | 3.52038651057348  | -5.67289556063004 |
| C | -1.00431738354986 | 2.92449584664463  | -6.81413837994541 |
| C | -1.72148431627962 | 4.90980265103433  | -5.64979475280923 |
| C | -0.60916245139727 | 3.70407427841493  | -7.89609232131570 |
| H | -0.89138706892880 | 1.84694386513099  | -6.84695145198537 |
| C | -1.31535721657448 | 5.69425267204265  | -6.73494787843903 |
| H | -2.17334789564217 | 5.38891979530886  | -4.78801480594138 |
| C | -0.75029274365283 | 5.09326461171053  | -7.86207122397386 |
| H | -0.17367306944065 | 3.23116529388128  | -8.77135432345373 |
| N | -1.47276505738002 | 7.10633359071613  | -6.67971905881152 |
| H | -0.42233596035564 | 5.71129092143536  | -8.69111366917272 |
| C | -0.99240753504950 | 7.94066515125683  | -5.66697119009879 |
| C | -2.12786993087385 | 7.89421147564082  | -7.62854621388562 |
| C | -1.34125925268109 | 9.28252770567037  | -5.97090560774217 |
| C | -0.25628499384633 | 7.61646715792300  | -4.52340491782683 |
| C | -2.06632806139254 | 9.25291201849954  | -7.22227140572911 |
| C | -2.79427710978462 | 7.50772597591352  | -8.79507392434222 |
| C | -0.95750135360696 | 10.30986396141535 | -5.10148569294286 |

|   |                   |                   |                    |
|---|-------------------|-------------------|--------------------|
| C | 0.11281800661266  | 8.65778208004173  | -3.67472460188603  |
| H | 0.01831940813159  | 6.59072490695327  | -4.30519211495120  |
| C | -2.66764067663184 | 10.23814143567547 | -8.01357748690833  |
| C | -3.38529105478384 | 8.50837138544181  | -9.56369361756253  |
| H | -2.85334270150549 | 6.46431130410094  | -9.08377114173899  |
| H | -1.22045376504177 | 11.34040989172678 | -5.32380153218952  |
| C | -0.23425283470434 | 9.99199939963161  | -3.95509186337763  |
| H | 0.68000988082431  | 8.42890032026670  | -2.77729062799392  |
| C | -3.32177271743341 | 9.86132598500246  | -9.18349261744687  |
| H | -2.62618747038399 | 11.28129344153675 | -7.71254522770345  |
| H | -3.90934841105205 | 8.23388987444750  | -10.47470867789787 |
| H | 0.06690388602228  | 10.77913237967739 | -3.27033091437082  |
| H | -3.79182713357446 | 10.61577390458759 | -9.80718973104300  |

**XYZ Coordinates of *mCz2i* in T<sub>1</sub> optimized geometry**

|   |                   |                   |                   |
|---|-------------------|-------------------|-------------------|
| N | -1.31718641303927 | 2.16741015945254  | 0.37839051219012  |
| C | -2.16916659525758 | 1.05947755415727  | 0.49476940000171  |
| C | -2.69936853086298 | 0.47500780773553  | -0.74710446867669 |
| C | -2.55901577653100 | 1.20996622960215  | -1.94420686426889 |
| C | -1.76833394443550 | 2.38916733480540  | -1.99238159089516 |
| C | -1.06279624430803 | 2.87583308730099  | -0.80450226235542 |
| C | -3.45525621164103 | -0.76153050662502 | -0.74981809440976 |
| C | -1.60633434400370 | 3.08739002872915  | -3.19724881583428 |
| O | -2.43264854869249 | 0.63292440098374  | 1.62279587508555  |
| O | -0.31128464277590 | 3.85177843788883  | -0.82185149306019 |
| H | -0.92783737089501 | 3.93242980461252  | -3.18541924399445 |
| C | -3.23245165187389 | 0.80220611441435  | -3.14646694434859 |
| C | -3.10183233891311 | 1.54507280782251  | -4.34100150357930 |
| C | -3.95494875578280 | 1.19327310316170  | -5.48574375248366 |
| N | -4.71545546120912 | 0.01812617673073  | -5.39211571381554 |

|   |                   |                   |                   |
|---|-------------------|-------------------|-------------------|
| C | -4.81478289703946 | -0.80161304159972 | -4.25859518590083 |
| C | -4.05849596348731 | -0.35135328494566 | -3.08624002265683 |
| C | -4.13034995148408 | -1.11406260093503 | -1.90969476421967 |
| H | -4.69801703596130 | -2.03652033506897 | -1.95551440931839 |
| O | -5.50943262349080 | -1.81800363096060 | -4.25811504292960 |
| O | -4.03633860117434 | 1.86976613652607  | -6.51494801673152 |
| C | -2.21540267766217 | 2.69080829474399  | -4.37993205731775 |
| C | -5.51096846342964 | -0.32417221564778 | -6.57525287649619 |
| H | -6.00065102081119 | -1.27542346851886 | -6.38263377837203 |
| H | -6.25027102315294 | 0.45726026991819  | -6.76592218391610 |
| H | -4.85855615211839 | -0.39183339691613 | -7.44805893776661 |
| C | -0.71961047950240 | 2.65018850498444  | 1.62718789689161  |
| H | -0.11331372023359 | 1.85741740150251  | 2.07259284129937  |
| H | -0.10307498427930 | 3.51307161197290  | 1.38830632259143  |
| H | -1.50606600598912 | 2.91840296193522  | 2.33549164285877  |
| C | -3.46972875725780 | -1.72300602068503 | 0.37341914744638  |
| C | -4.66711596844947 | -2.35513739284074 | 0.75684533992845  |
| C | -2.27963969588644 | -2.09926262381546 | 1.01280978207277  |
| C | -4.67471578025922 | -3.31846247664722 | 1.76547401843774  |
| H | -5.59663640560723 | -2.06679533387431 | 0.27674694287109  |
| C | -2.29143832484537 | -3.04967037168780 | 2.02978401437022  |
| H | -1.33892416131104 | -1.65061366736836 | 0.71854356966080  |
| C | -3.49306751826118 | -3.66701100882959 | 2.41486726208350  |
| H | -5.60981339372686 | -3.78386181671025 | 2.06085740108586  |
| N | -1.08416044891125 | -3.37718909795110 | 2.69815275121077  |
| H | -3.48878502887051 | -4.38548494492496 | 3.22742328296700  |
| C | -0.20369192743547 | -2.45980288669723 | 3.28431764886632  |
| C | -0.56074083276592 | -4.66251254006049 | 2.85473827670767  |
| C | 0.89850112823125  | -3.16876415400621 | 3.82719869142973  |

|   |                   |                   |                   |
|---|-------------------|-------------------|-------------------|
| C | -0.32861247699812 | -1.07180472559151 | 3.40648770927786  |
| C | 0.67138931613920  | -4.57451102867242 | 3.55400000245894  |
| C | -1.06535372400760 | -5.88502069418742 | 2.40139641940010  |
| C | 1.91156820227095  | -2.46716261918077 | 4.48402174718180  |
| C | 0.69906084850862  | -0.39795276212675 | 4.06652233101807  |
| H | -1.18282796080917 | -0.53691615355788 | 3.00664191156290  |
| C | 1.39325915649364  | -5.73847564241372 | 3.82423405924696  |
| C | -0.32667881989166 | -7.03276165989749 | 2.68582394790113  |
| H | -1.99267446086319 | -5.93561191139322 | 1.84202069818430  |
| C | 1.80830391184579  | -1.07962738728712 | 4.59536838954285  |
| H | 2.76204051199919  | -2.99533406222908 | 4.90508881370129  |
| H | 0.63091546446086  | 0.68000769465257  | 4.18042051440832  |
| C | 0.88647348541466  | -6.96498817258776 | 3.39172149981897  |
| H | 2.33723904900490  | -5.68726992242084 | 4.35887827443345  |
| H | -0.69561063558368 | -7.99653480372333 | 2.34839138874336  |
| H | 2.58876627207502  | -0.52130203761643 | 5.10315664968415  |
| H | 1.43803529639067  | -7.87737915945681 | 3.59612493342974  |
| C | -1.85046831768366 | 3.43362860576763  | -5.60453813413579 |
| C | -1.44838820964235 | 2.77329757839164  | -6.78498042501240 |
| C | -1.79349917409756 | 4.83305884691618  | -5.56798841032694 |
| C | -0.99132571388761 | 3.49730779335857  | -7.88203163612335 |
| H | -1.48235464042472 | 1.69197287667289  | -6.82669579232970 |
| C | -1.33511504194111 | 5.55822036471139  | -6.67107663419372 |
| H | -2.13839061928863 | 5.36585220869732  | -4.68946711273140 |
| C | -0.92612448070858 | 4.88904498588973  | -7.83592431927416 |
| H | -0.66968320489702 | 2.97435697736170  | -8.77707308684011 |
| N | -1.26539448249991 | 6.96928097520406  | -6.60679093504320 |
| H | -0.54106612660655 | 5.45911460444464  | -8.67417562557167 |
| C | -0.68226533060094 | 7.71385005836936  | -5.57183850516985 |

|   |                   |                   |                    |
|---|-------------------|-------------------|--------------------|
| C | -1.77303613025229 | 7.85752267777495  | -7.56244635609992  |
| C | -0.80755182020901 | 9.09353572082139  | -5.87488015704687  |
| C | -0.02233561357459 | 7.27209982937867  | -4.42118921891616  |
| C | -1.50240064183545 | 9.18539804418650  | -7.14415858078427  |
| C | -2.48990026445791 | 7.58616078137767  | -8.73150063580205  |
| C | -0.28467827318020 | 10.04391403103300 | -4.99563708143152  |
| C | 0.48917461954979  | 8.23963129276864  | -3.55763408963486  |
| H | 0.09456231293593  | 6.21666944734167  | -4.20590179033313  |
| C | -1.92699620204967 | 10.25639834275960 | -7.93258134983604  |
| C | -2.90207241775724 | 8.67242231927473  | -9.50240033014268  |
| H | -2.72929249959296 | 6.56942879297634  | -9.02083567394191  |
| H | -0.37464696102916 | 11.10351417021849 | -5.21613252659441  |
| C | 0.35718347075440  | 9.61045481294201  | -3.83508923842158  |
| H | 0.99813432224355  | 7.92095048328389  | -2.65340916031458  |
| C | -2.62072385122031 | 9.99289646832340  | -9.11438818462626  |
| H | -1.72628558497038 | 11.27822293936961 | -7.62438610949924  |
| H | -3.45901793208582 | 8.49057534095709  | -10.41642732348330 |
| H | 0.76331604106208  | 10.33875885329429 | -3.14016455725942  |
| H | -2.95637820310796 | 10.81661609215841 | -9.73661980578277  |

**XYZ Coordinates of *pCz2* in  $S_0$  optimized geometry**

|   |           |           |           |
|---|-----------|-----------|-----------|
| N | 1.598250  | -0.092728 | 0.119777  |
| C | 0.399337  | -0.795886 | 0.287162  |
| C | -0.573036 | -0.743888 | -0.841419 |
| C | -0.361222 | 0.218919  | -1.874835 |
| C | 0.809604  | 1.035188  | -1.915259 |
| C | 1.920881  | 0.735501  | -0.964955 |
| C | -1.721946 | -1.550693 | -0.846882 |
| C | 0.945183  | 2.032417  | -2.895504 |
| O | 0.211876  | -1.414182 | 1.324270  |

|   |           |           |           |
|---|-----------|-----------|-----------|
| O | 3.054852  | 1.169555  | -1.098226 |
| C | -1.350272 | 0.376962  | -2.885578 |
| C | -1.168717 | 1.339304  | -3.903957 |
| C | -2.185052 | 1.514122  | -4.978752 |
| N | -3.314760 | 0.683952  | -4.911220 |
| C | -3.551808 | -0.274697 | -3.917326 |
| C | -2.513336 | -0.424274 | -2.863069 |
| C | -2.685227 | -1.363196 | -1.869158 |
| H | -3.575834 | -1.981582 | -1.887333 |
| O | -4.572528 | -0.946865 | -3.938094 |
| O | -2.046291 | 2.334725  | -5.873747 |
| C | -0.055074 | 2.150887  | -3.892343 |
| H | 0.037696  | 2.912812  | -4.658173 |
| C | -4.349640 | 0.810226  | -5.945589 |
| H | -4.467765 | -0.143965 | -6.463034 |
| H | -5.302997 | 1.067081  | -5.479660 |
| H | -4.038982 | 1.587210  | -6.639088 |
| C | 2.597237  | -0.279283 | 1.180981  |
| H | 2.862107  | -1.336083 | 1.258062  |
| H | 3.472713  | 0.312304  | 0.927527  |
| H | 2.173558  | 0.035714  | 2.136227  |
| C | -2.011867 | -2.635344 | 0.129750  |
| C | -3.217756 | -2.624692 | 0.843016  |
| C | -1.147139 | -3.728496 | 0.287271  |
| C | -3.533647 | -3.652204 | 1.728841  |
| H | -3.898197 | -1.785517 | 0.732867  |
| C | -1.471888 | -4.774961 | 1.139367  |
| H | -0.218110 | -3.759494 | -0.272280 |
| C | -2.663157 | -4.736874 | 1.880176  |



|   |           |           |           |
|---|-----------|-----------|-----------|
| H | -4.445879 | -3.613882 | 2.313992  |
| H | -0.813291 | -5.631195 | 1.235701  |
| N | -2.979159 | -5.788266 | 2.772447  |
| C | -4.189808 | -6.491429 | 2.818110  |
| C | -2.135944 | -6.292371 | 3.771635  |
| C | -4.119425 | -7.458662 | 3.852909  |
| C | -5.319329 | -6.371552 | 2.003935  |
| C | -2.811932 | -7.331284 | 4.460495  |
| C | -0.852510 | -5.881439 | 4.141710  |
| C | -5.211960 | -8.300652 | 4.087175  |
| C | -6.394171 | -7.221692 | 2.258331  |
| H | -5.356870 | -5.647491 | 1.197880  |
| C | -2.175016 | -7.986044 | 5.520410  |
| C | -0.240790 | -6.549153 | 5.201377  |
| H | -0.353911 | -5.065174 | 3.630996  |
| C | -6.347346 | -8.174498 | 3.291033  |
| H | -5.169346 | -9.044423 | 4.877757  |
| H | -7.284600 | -7.145533 | 1.641226  |
| C | -0.888989 | -7.594482 | 5.882628  |
| H | -2.682603 | -8.784064 | 6.054873  |
| H | 0.757266  | -6.249856 | 5.507684  |
| H | -7.203093 | -8.819808 | 3.464013  |
| H | -0.382499 | -8.094738 | 6.702351  |
| C | 2.037527  | 3.039278  | -2.938925 |
| C | 2.741050  | 3.269736  | -4.129056 |
| C | 2.319470  | 3.846683  | -1.825846 |
| C | 3.732084  | 4.246473  | -4.196986 |
| H | 2.539219  | 2.652666  | -4.999519 |
| C | 3.283519  | 4.841757  | -1.893758 |

|   |          |           |           |
|---|----------|-----------|-----------|
| H | 1.766300 | 3.697093  | -0.904532 |
| C | 4.009676 | 5.039120  | -3.078094 |
| H | 4.304237 | 4.389419  | -5.107149 |
| H | 3.479677 | 5.479090  | -1.038449 |
| N | 5.015625 | 6.031783  | -3.133487 |
| C | 5.126071 | 7.041614  | -4.097515 |
| C | 6.071510 | 6.170372  | -2.223034 |
| C | 6.261675 | 7.837237  | -3.799252 |
| C | 4.291445 | 7.332623  | -5.179754 |
| C | 6.865061 | 7.280882  | -2.606823 |
| C | 6.403488 | 5.376591  | -1.121794 |
| C | 6.573851 | 8.928860  | -4.616632 |
| C | 4.624433 | 8.425506  | -5.978378 |
| H | 3.411461 | 6.733981  | -5.386558 |
| C | 7.996752 | 7.613462  | -1.853967 |
| C | 7.535797 | 5.729005  | -0.389447 |
| H | 5.808263 | 4.511313  | -0.852225 |
| C | 5.755270 | 9.215303  | -5.706064 |
| H | 7.441269 | 9.545190  | -4.398115 |
| H | 3.992276 | 8.671365  | -6.826602 |
| C | 8.323869 | 6.837900  | -0.744792 |
| H | 8.612430 | 8.462502  | -2.136977 |
| H | 7.815038 | 5.128757  | 0.471525  |
| H | 5.987220 | 10.058334 | -6.349642 |
| H | 9.198357 | 7.085793  | -0.151036 |

**XYZ Coordinates of *pCz2* in  $S_1$  optimized geometry**

|   |                   |                   |                   |
|---|-------------------|-------------------|-------------------|
| N | 1.36360253533084  | -0.26817796992643 | 0.05919213537455  |
| C | 0.21944689975907  | -1.06037921462879 | 0.06404906662283  |
| C | -0.70636705020526 | -0.87870947232564 | -1.04887721286845 |

|   |                   |                   |                   |
|---|-------------------|-------------------|-------------------|
| C | -0.44370464969482 | 0.12127047668866  | -2.02822748152822 |
| C | 0.70975205702954  | 0.95898204140036  | -1.95642519140233 |
| C | 1.70856545541419  | 0.70355817079613  | -0.91582021414319 |
| C | -1.86794762617170 | -1.69292748954916 | -1.15804258430978 |
| C | 0.90833549347258  | 1.97363335915616  | -2.94387768210129 |
| O | 0.05203698997592  | -1.87679131680937 | 0.98638157803154  |
| O | 2.80361816100538  | 1.26245956887401  | -0.83788319811491 |
| C | -1.36823078437856 | 0.27692130937507  | -3.11489139257028 |
| C | -1.12224117106379 | 1.25779560684960  | -4.10363373326397 |
| C | -2.04199945820960 | 1.43700465694596  | -5.22875629305949 |
| N | -3.16337713721097 | 0.58040402481704  | -5.25342428277337 |
| C | -3.45783512629016 | -0.40426094006822 | -4.30101943733741 |
| C | -2.51085044536084 | -0.55022416926821 | -3.19533549423047 |
| C | -2.74753550348843 | -1.52534083623284 | -2.21281557003317 |
| H | -3.63519562827010 | -2.13977220576538 | -2.31278200882317 |
| O | -4.47441164896588 | -1.09621633129806 | -4.42309326781374 |
| O | -1.87011544962033 | 2.27742127357764  | -6.11449347440249 |
| C | 0.00072795516878  | 2.08799793509553  | -3.99373845416450 |
| H | 0.13273195500668  | 2.85862345224178  | -4.74455668325843 |
| C | -4.11871889482064 | 0.71140184557183  | -6.35343880217224 |
| H | -4.19097071292239 | -0.23462188771808 | -6.89546089911071 |
| H | -5.10965137424390 | 0.94580707991451  | -5.95718348495221 |
| H | -3.76724527324405 | 1.50529377908262  | -7.00791072492764 |
| C | 2.30461025990110  | -0.50540812456033 | 1.15419275834638  |
| H | 2.65715806101056  | -1.53973596198803 | 1.12604456326151  |
| H | 3.13659353020176  | 0.18327742931358  | 1.03361018976655  |
| H | 1.80134535489914  | -0.34895355029116 | 2.11112350633750  |
| C | -2.17848272948709 | -2.75112981745777 | -0.14743167135254 |
| C | -3.08603307609264 | -2.49605809487876 | 0.88870091723921  |

|   |                   |                   |                   |
|---|-------------------|-------------------|-------------------|
| C | -1.61662141745889 | -4.03172589832937 | -0.25799189985221 |
| C | -3.37798134957014 | -3.46746498200198 | 1.84096188369268  |
| H | -3.53499893111646 | -1.51236649943728 | 0.96547341099704  |
| C | -1.87999549779927 | -5.01005274366978 | 0.69008390140852  |
| H | -0.93918687041464 | -4.24108111181144 | -1.07783062527514 |
| C | -2.74856891061624 | -4.70978131883978 | 1.74406731785116  |
| H | -4.04069975952131 | -3.25500360687232 | 2.67372347194938  |
| H | -1.43115908882143 | -5.99565652456294 | 0.61991628936603  |
| N | -2.95825076072665 | -5.68819673726604 | 2.77150726573628  |
| C | -4.17408489630853 | -6.24260524345120 | 3.13461822329748  |
| C | -1.95611884257787 | -6.21695404097006 | 3.56511773896021  |
| C | -3.96148411945784 | -7.17046714537609 | 4.19211881306337  |
| C | -5.43711118535989 | -6.00706475604033 | 2.57651949010334  |
| C | -2.52766440342495 | -7.15623542104453 | 4.46862699648629  |
| C | -0.59166397765071 | -5.88978531423580 | 3.56890924980226  |
| C | -5.04188464728683 | -7.86197061410350 | 4.71168153787670  |
| C | -6.51184626759571 | -6.71010052863007 | 3.11987270504067  |
| H | -5.56070747266719 | -5.30953088918357 | 1.75742008448973  |
| C | -1.70785564187821 | -7.80552391295475 | 5.37435121524642  |
| C | 0.21444550487549  | -6.56115341583797 | 4.48668401645079  |
| H | -0.19745892813397 | -5.13810013391296 | 2.89538515536355  |
| C | -6.32077178703987 | -7.61958644481578 | 4.16936529225852  |
| H | -4.91456154989256 | -8.57949163456602 | 5.51520788754858  |
| H | -7.50714888517684 | -6.55487060726762 | 2.71992637857264  |
| C | -0.32917893707705 | -7.50495854842413 | 5.36985777893195  |
| H | -2.10920601137619 | -8.52479876696591 | 6.08019473272698  |
| H | 1.27495616779168  | -6.34147799856048 | 4.52375767078627  |
| H | -7.17403811777982 | -8.15533087604224 | 4.57057040326336  |
| H | 0.32187389170650  | -8.00889500288759 | 6.07569781409335  |

|   |                  |                  |                   |
|---|------------------|------------------|-------------------|
| C | 2.00411588506425 | 2.98392551460630 | -2.90790322017843 |
| C | 2.82675966848359 | 3.16563946119917 | -4.02681034502061 |
| C | 2.17144217053165 | 3.84540793589275 | -1.81270204846893 |
| C | 3.81159324827292 | 4.15356632241165 | -4.04539937547099 |
| H | 2.70900921631424 | 2.50796417348771 | -4.88251764451661 |
| C | 3.12994095720088 | 4.84991495620076 | -1.83166504987003 |
| H | 1.53825979216395 | 3.72136151407645 | -0.94113285284243 |
| C | 3.96482926379391 | 5.00093573226789 | -2.94670360208073 |
| H | 4.46771730724217 | 4.26624852345439 | -4.90230369548714 |
| H | 3.24275041691290 | 5.52462981628392 | -0.98932128446408 |
| N | 4.96668475814106 | 6.01116175554166 | -2.95267214252178 |
| C | 5.10659330849445 | 7.02088523499587 | -3.90550078226281 |
| C | 5.97868204236194 | 6.15582556444844 | -2.00255449906776 |
| C | 6.22267639626290 | 7.82874317951239 | -3.56252454005002 |
| C | 4.31937621044920 | 7.29506800704171 | -5.02750382633453 |
| C | 6.77982226841153 | 7.27593029545828 | -2.34728672694925 |
| C | 6.26016426197473 | 5.36716356121395 | -0.88314016064946 |
| C | 6.55797620017471 | 8.92049475126834 | -4.37147242608332 |
| C | 4.67483440687723 | 8.38818836223953 | -5.81468779339573 |
| H | 3.46199075279632 | 6.67722723946866 | -5.27045156469045 |
| C | 7.87176178512710 | 7.61659086214398 | -1.54071888788132 |
| C | 7.35344473839976 | 5.72837095981969 | -0.09876755722735 |
| H | 5.64971188625567 | 4.50372943622294 | -0.64219500665087 |
| C | 5.78363713489502 | 9.19354605328276 | -5.49585613712395 |
| H | 7.41029005808149 | 9.54576463888861 | -4.12003021970760 |
| H | 4.07990039191698 | 8.62227314179619 | -6.69285286780484 |
| C | 8.15148034546436 | 6.84254996676101 | -0.41778068919646 |
| H | 8.49230585824602 | 8.47201979274977 | -1.79330999846479 |
| H | 7.59432799934407 | 5.13267110742049 | 0.77712394903580  |

|   |                  |                   |                   |
|---|------------------|-------------------|-------------------|
| H | 6.03393964794248 | 10.03663750755743 | -6.13280952708617 |
| H | 8.99510434632349 | 7.09662572341454  | 0.21707884601040  |

**XYZ Coordinates of *p*Cz2 in T<sub>1</sub> optimized geometry**

|   |                   |                   |                   |
|---|-------------------|-------------------|-------------------|
| N | 1.63915824710486  | -0.18602935197083 | 0.01471732207526  |
| C | 0.42486244652101  | -0.86140716756143 | 0.20597180327302  |
| C | -0.55661624751795 | -0.76946572343701 | -0.88503621603575 |
| C | -0.32325519775172 | 0.16554956121125  | -1.93834218183263 |
| C | 0.85965644763901  | 0.94635891303357  | -1.99323678554548 |
| C | 1.95183698027582  | 0.64755196822034  | -1.06681587459497 |
| C | -1.75675276482282 | -1.54559149784434 | -0.86608408471646 |
| C | 1.02690849301690  | 1.94704277909860  | -3.04532287879246 |
| O | 0.25686193772490  | -1.49457018499350 | 1.24740870004698  |
| O | 3.09591066536004  | 1.10445174721922  | -1.19052128676186 |
| C | -1.30308511860841 | 0.30927805329423  | -2.97750306801244 |
| C | -1.06366425572413 | 1.20429292288286  | -4.05931574688523 |
| C | -2.04525927333625 | 1.35158888664097  | -5.14222392498504 |
| N | -3.21160397965891 | 0.57298957949805  | -5.03065740833595 |
| C | -3.49612591141736 | -0.31420958015093 | -3.98386359739783 |
| C | -2.47985627847313 | -0.44275684226175 | -2.92809610044419 |
| C | -2.69543747021426 | -1.35410840156585 | -1.86964457788219 |
| H | -3.61074645202727 | -1.93533465857001 | -1.88319159944910 |
| O | -4.55257126204564 | -0.94391218237729 | -3.97582917861790 |
| O | -1.87061524618582 | 2.10772833160229  | -6.09769002132859 |
| C | 0.08277922331139  | 2.00012596010162  | -4.06865029159309 |
| H | 0.16709652333060  | 2.73396657867948  | -4.86196322459621 |
| C | -4.23251670525961 | 0.67956892668192  | -6.07715102360982 |
| H | -4.39209182402188 | -0.29855420537866 | -6.53642592786529 |
| H | -5.17775341839683 | 1.00436247348497  | -5.63672002240650 |
| H | -3.88279086519613 | 1.39826711317435  | -6.81390085222440 |

|   |                   |                   |                   |
|---|-------------------|-------------------|-------------------|
| C | 2.65286388131263  | -0.40111199173820 | 1.05304490589930  |
| H | 2.89100538321850  | -1.46499453868760 | 1.12311695433625  |
| H | 3.53732693032457  | 0.17013023546223  | 0.78394706196177  |
| H | 2.25703688453288  | -0.08128136391005 | 2.01906083926931  |
| C | -2.04873111485694 | -2.61425685808501 | 0.13051194674545  |
| C | -3.21298150696878 | -2.55189043449957 | 0.90644370076702  |
| C | -1.22521152476276 | -3.74478752792939 | 0.24566082322618  |
| C | -3.53170663275590 | -3.56898429256413 | 1.80437510138066  |
| H | -3.85890666210290 | -1.68289549619780 | 0.82775244509127  |
| C | -1.54650221597061 | -4.77521435664965 | 1.11789829123707  |
| H | -0.32774686510580 | -3.81251362276273 | -0.36008611872130 |
| C | -2.69806735170381 | -4.68591220777317 | 1.91396019697568  |
| H | -4.41283324322661 | -3.49517278343581 | 2.43276960907184  |
| H | -0.91891066193055 | -5.65735780363534 | 1.18627110749035  |
| N | -3.01132755820960 | -5.72517001782588 | 2.82704256608280  |
| C | -4.23171426214237 | -6.40162120679048 | 2.91181391067696  |
| C | -2.14772851276786 | -6.24306444001453 | 3.79725365428217  |
| C | -4.15079511744050 | -7.36855258798311 | 3.94740667392910  |
| C | -5.38239094575378 | -6.25532901123621 | 2.13140136353295  |
| C | -2.82076370851902 | -7.26735649398495 | 4.51226106001092  |
| C | -0.84300031266917 | -5.85647510505876 | 4.11826605381270  |
| C | -5.25327125652620 | -8.18434044452049 | 4.21622897218927  |
| C | -6.46797226076859 | -7.08026289061728 | 2.42040481763865  |
| H | -5.42503482558613 | -5.53017094640419 | 1.32674073666128  |
| C | -2.16068497596551 | -7.93122392243715 | 5.55007701790368  |
| C | -0.20750656844260 | -6.53425995942213 | 5.15728217944845  |
| H | -0.34894365534194 | -5.05260929913232 | 3.58411180757674  |
| C | -6.41005885169247 | -8.03236818901381 | 3.45298761420766  |
| H | -5.20500429133249 | -8.92849540802591 | 5.00602719746074  |

|   |                   |                   |                   |
|---|-------------------|-------------------|-------------------|
| H | -7.37506759663915 | -6.98530974971139 | 1.83108083049501  |
| C | -0.85305345241930 | -7.56385014562175 | 5.86416534633858  |
| H | -2.66343608020014 | -8.71767075535384 | 6.10572600911159  |
| H | 0.80693535506555  | -6.25581103586822 | 5.42668134759528  |
| H | -7.27410012931704 | -8.65844992107403 | 3.65307470206377  |
| H | -0.32821634963389 | -8.07253885020750 | 6.66694884022360  |
| C | 2.07585178707042  | 2.96696361675119  | -3.03253435874225 |
| C | 2.68171215962910  | 3.38552807279112  | -4.24117365040559 |
| C | 2.45383750931563  | 3.64230545364770  | -1.84385378898496 |
| C | 3.62799748505091  | 4.39465924945536  | -4.26387930360879 |
| H | 2.44251618940739  | 2.86311331914421  | -5.16110453172379 |
| C | 3.38346673650218  | 4.66343417919251  | -1.86042247785567 |
| H | 1.97168568440689  | 3.38210924882089  | -0.91053334939483 |
| C | 3.99459122104439  | 5.04530743922081  | -3.06912335464315 |
| H | 4.13091012787489  | 4.65393917243514  | -5.18874862271977 |
| H | 3.62590290348101  | 5.19725554929464  | -0.94858086638496 |
| N | 4.97210779272552  | 6.05338231543712  | -3.08146280211954 |
| C | 5.04226168190582  | 7.12383633916459  | -3.98837367977202 |
| C | 6.05206050849741  | 6.15805573980074  | -2.18775054322602 |
| C | 6.17202946721663  | 7.91831321323384  | -3.67130770874942 |
| C | 4.16006662524644  | 7.47820967420730  | -5.01263983309062 |
| C | 6.81570846631790  | 7.30244301861847  | -2.52629211500044 |
| C | 6.44019720066245  | 5.29317397747338  | -1.16073496109278 |
| C | 6.44358331096592  | 9.06380668808972  | -4.42089697150225 |
| C | 4.45387804862524  | 8.62482931243385  | -5.75044514784493 |
| H | 3.27135453871084  | 6.89423688990525  | -5.22010128342189 |
| C | 7.96429331078212  | 7.60810177319170  | -1.79439790202579 |
| C | 7.59003503034923  | 5.62038886554080  | -0.44244471191019 |
| H | 5.88087461915198  | 4.39249413745370  | -0.93720033148372 |



|   |                  |                   |                   |
|---|------------------|-------------------|-------------------|
| C | 5.58459285252451 | 9.40699076975857  | -5.46566205663255 |
| H | 7.30568152885812 | 9.68150462083781  | -4.18767050642262 |
| H | 3.78739654923207 | 8.91948505675070  | -6.55503343915031 |
| C | 8.34128719721421 | 6.76690672092073  | -0.74698760561460 |
| H | 8.55877411455145 | 8.48198041400078  | -2.04362143830754 |
| H | 7.91143535397751 | 4.96771633306176  | 0.36321909169675  |
| H | 5.78480698980279 | 10.29406021226228 | -6.05826387942507 |
| H | 9.23103537157085 | 6.99343305110136  | -0.16800138789531 |

**XYZ Coordinates of *pCz2i* in  $S_0$  optimized geometry**

|   |           |           |           |
|---|-----------|-----------|-----------|
| N | -0.801621 | 1.972989  | 0.582795  |
| C | -1.592274 | 0.812042  | 0.525568  |
| C | -2.122901 | 0.400202  | -0.809557 |
| C | -1.955998 | 1.292553  | -1.907004 |
| C | -1.197067 | 2.480982  | -1.772959 |
| C | -0.557670 | 2.843815  | -0.482238 |
| C | -2.843596 | -0.790812 | -0.981688 |
| C | -1.050241 | 3.340214  | -2.841786 |
| O | -1.816015 | 0.203740  | 1.560710  |
| O | 0.128683  | 3.847709  | -0.351831 |
| H | -0.478869 | 4.248924  | -2.688712 |
| C | -2.535951 | 1.015480  | -3.177649 |
| C | -2.366586 | 1.906614  | -4.275895 |
| C | -2.906653 | 1.500577  | -5.608410 |
| N | -3.697408 | 0.339664  | -5.665593 |
| C | -3.937286 | -0.533718 | -4.601793 |
| C | -3.294645 | -0.173154 | -3.311926 |
| C | -3.435131 | -1.036331 | -2.245221 |
| H | -4.002574 | -1.947313 | -2.399460 |
| O | -4.623713 | -1.537655 | -4.732031 |

|   |           |           |           |
|---|-----------|-----------|-----------|
| O | -2.691637 | 2.115649  | -6.641269 |
| C | -1.638062 | 3.092890  | -4.106980 |
| C | -4.246767 | 0.006318  | -6.986578 |
| H | -4.895035 | -0.858360 | -6.871117 |
| H | -4.802830 | 0.861347  | -7.374205 |
| H | -3.433904 | -0.215419 | -7.681620 |
| C | -0.261100 | 2.312283  | 1.905822  |
| H | 0.292204  | 1.458925  | 2.301059  |
| H | 0.388265  | 3.176184  | 1.790672  |
| H | -1.078542 | 2.537521  | 2.594360  |
| C | -3.010428 | -1.859394 | 0.038672  |
| C | -4.292686 | -2.324359 | 0.360636  |
| C | -1.901164 | -2.492225 | 0.619520  |
| C | -4.469433 | -3.361868 | 1.273326  |
| H | -5.162428 | -1.845372 | -0.079274 |
| C | -2.067036 | -3.550895 | 1.500946  |
| H | -0.901543 | -2.155387 | 0.366817  |
| C | -3.355851 | -3.984228 | 1.847899  |
| H | -5.465946 | -3.684817 | 1.553785  |
| H | -1.205305 | -4.055095 | 1.924300  |
| N | -3.522596 | -5.041354 | 2.772766  |
| C | -4.307894 | -6.185712 | 2.582529  |
| C | -2.926169 | -5.118257 | 4.038702  |
| C | -4.210215 | -7.004991 | 3.736027  |
| C | -5.061020 | -6.573404 | 1.471043  |
| C | -3.331537 | -6.324816 | 4.663389  |
| C | -2.098575 | -4.198281 | 4.688367  |
| C | -4.898945 | -8.221936 | 3.780245  |
| C | -5.738596 | -7.789659 | 1.540727  |

|   |           |           |           |
|---|-----------|-----------|-----------|
| H | -5.110670 | -5.954686 | 0.582075  |
| C | -2.875598 | -6.623295 | 5.952131  |
| C | -1.658335 | -4.519441 | 5.971269  |
| H | -1.817046 | -3.263461 | 4.216613  |
| C | -5.665141 | -8.606208 | 2.682887  |
| H | -4.830188 | -8.856865 | 4.658884  |
| H | -6.332994 | -8.112273 | 0.690922  |
| C | -2.035172 | -5.720400 | 6.598043  |
| H | -3.180571 | -7.544707 | 6.439933  |
| H | -1.013040 | -3.821968 | 6.497224  |
| H | -6.206748 | -9.546889 | 2.704645  |
| H | -1.671798 | -5.939843 | 7.597331  |
| C | -1.449881 | 4.157618  | -5.129594 |
| C | -2.542367 | 4.822486  | -5.705857 |
| C | -0.155985 | 4.592537  | -5.446551 |
| C | -2.348589 | 5.879653  | -6.585037 |
| H | -3.550047 | 4.495222  | -5.473779 |
| C | 0.047562  | 5.652531  | -6.327016 |
| H | 0.700529  | 4.096251  | -4.999776 |
| C | -1.049417 | 6.302353  | -6.902689 |
| H | -3.196095 | 6.378303  | -7.042539 |
| H | 1.051201  | 5.990906  | -6.560395 |
| N | -0.849734 | 7.382470  | -7.795067 |
| C | -1.429351 | 8.652817  | -7.686247 |
| C | -0.018998 | 7.369453  | -8.922869 |
| C | -0.963776 | 9.462111  | -8.753785 |
| C | -2.294386 | 9.154802  | -6.710399 |
| C | -0.067202 | 8.643977  | -9.542502 |
| C | 0.732955  | 6.321062  | -9.459669 |

|   |           |           |            |
|---|-----------|-----------|------------|
| C | -1.394089 | 10.789690 | -8.853229  |
| C | -2.707771 | 10.480372 | -6.832102  |
| H | -2.627214 | 8.538011  | -5.883137  |
| C | 0.673639  | 8.874293  | -10.706946 |
| C | 1.460983  | 6.576143  | -10.620512 |
| H | 0.742407  | 5.341649  | -8.994635  |
| C | -2.268825 | 11.291640 | -7.893104  |
| H | -1.044517 | 11.417904 | -9.667566  |
| H | -3.381479 | 10.893481 | -6.087114  |
| C | 1.438396  | 7.839131  | -11.238217 |
| H | 0.645070  | 9.846840  | -11.189980 |
| H | 2.054532  | 5.778328  | -11.057253 |
| H | -2.612631 | 12.319315 | -7.959190  |
| H | 2.018695  | 8.004206  | -12.140827 |

**XYZ Coordinates of *pCz2i* in  $S_1$  optimized geometry**

|   |                   |                   |                   |
|---|-------------------|-------------------|-------------------|
| N | -0.94884485393952 | 1.64953599104686  | 0.49192443681561  |
| C | -1.62876168893589 | 0.44064594009671  | 0.32157630095923  |
| C | -2.12047222370192 | 0.13543633086411  | -1.02163267212131 |
| C | -1.92709841370065 | 1.07784817715313  | -2.06792212199348 |
| C | -1.24433386610479 | 2.29464663763900  | -1.83386393931972 |
| C | -0.71498419197149 | 2.61677252266281  | -0.51298555375933 |
| C | -2.79594335484709 | -1.08327310809307 | -1.29830658032113 |
| C | -1.08455558970379 | 3.22163774202954  | -2.87474689957009 |
| O | -1.77705815964451 | -0.30754290490086 | 1.30229124726164  |
| O | -0.10169982950230 | 3.65381350701381  | -0.25274698729573 |
| H | -0.59051716388435 | 4.15728733456175  | -2.63923708612597 |
| C | -2.41460332403415 | 0.81178439145613  | -3.39155769815217 |
| C | -2.22016946905782 | 1.75739024863669  | -4.44101494670985 |
| C | -2.63606567493092 | 1.38767537928032  | -5.80074097386980 |

|   |                   |                    |                   |
|---|-------------------|--------------------|-------------------|
| N | -3.33765905232217 | 0.17278305021644   | -5.95364031996451 |
| C | -3.59981276308735 | -0.76009744555487  | -4.94386373668962 |
| C | -3.08493296365738 | -0.41434663440853  | -3.62084169275947 |
| C | -3.26394834878043 | -1.33756901668794  | -2.57498800910241 |
| H | -3.77938309891538 | -2.261911110760169 | -2.81011044882207 |
| O | -4.21618207806263 | -1.80635877941848  | -5.17586678955394 |
| O | -2.41469293304067 | 2.05800673401964   | -6.81088068192393 |
| C | -1.56494685183477 | 2.99270564333687   | -4.16201217080514 |
| C | -3.77013781748168 | -0.13600819645774  | -7.31744679295635 |
| H | -4.32865534781729 | -1.06823187236831  | -7.28601373045677 |
| H | -4.38883805451296 | 0.67835416485492   | -7.70051353048154 |
| H | -2.90053499293426 | -0.22823757147396  | -7.97276372583804 |
| C | -0.45923392946095 | 1.92418331967079   | 1.84208200355402  |
| H | 0.23241144214766  | 1.13762039790438   | 2.15400646439029  |
| H | 0.04021460785615  | 2.88977596753130   | 1.82289953749572  |
| H | -1.29508660660620 | 1.93447545364769   | 2.54591123113873  |
| C | -3.01519711412835 | -2.12298361034886  | -0.24644703373403 |
| C | -4.26421793576353 | -2.25332506366388  | 0.37200487236163  |
| C | -1.99206565069883 | -3.02027530574747  | 0.09358073029601  |
| C | -4.48062513506470 | -3.21509116116370  | 1.35602160060456  |
| H | -5.06158603096215 | -1.57150017865266  | 0.09880773918982  |
| C | -2.17969819121538 | -3.97479128401504  | 1.08308007305589  |
| H | -1.03196353004334 | -2.93704948497120  | -0.40246974820523 |
| C | -3.42375898381391 | -4.05076603232693  | 1.71604657877450  |
| H | -5.43431781302122 | -3.28796455431954  | 1.86895519311064  |
| H | -1.38372243890254 | -4.65688178757129  | 1.36421216138807  |
| N | -3.59561263392891 | -4.98143461395209  | 2.79687295845374  |
| C | -4.49673970173919 | -6.03063015284181  | 2.83457816935137  |
| C | -2.87158070141415 | -4.95294254338607  | 3.97382851250889  |

|   |                   |                   |                   |
|---|-------------------|-------------------|-------------------|
| C | -4.35332570016278 | -6.71867092109962 | 4.07212317525522  |
| C | -5.40539742883595 | -6.43030756452104 | 1.84599431802927  |
| C | -3.30109293968193 | -6.02304769552174 | 4.80828948837341  |
| C | -1.89425269596658 | -4.02530012893449 | 4.36570369196801  |
| C | -5.14841147194787 | -7.82195024960913 | 4.32716281766650  |
| C | -6.20020449710565 | -7.54095909537260 | 2.12722852580853  |
| H | -5.47611313774798 | -5.89372173173233 | 0.90794566561096  |
| C | -2.71823745589642 | -6.18291132463020 | 6.05242347530822  |
| C | -1.31913405821405 | -4.20995421705325 | 5.62179815137678  |
| H | -1.61733421286909 | -3.20137822549811 | 3.71861276857043  |
| C | -6.07711751043659 | -8.22465468371129 | 3.34486754011816  |
| H | -5.06214193710770 | -8.37240567152477 | 5.25788758361614  |
| H | -6.91874063670868 | -7.88251207512627 | 1.39124271351992  |
| C | -1.71789388698254 | -5.26959873853273 | 6.44926639874159  |
| H | -3.02222169345334 | -6.98487078578679 | 6.71655811469000  |
| H | -0.55920085860846 | -3.51828760150432 | 5.96582174378580  |
| H | -6.70580404950616 | -9.08737590362676 | 3.53583709272072  |
| H | -1.25482749598533 | -5.38643098354650 | 7.42288125312232  |
| C | -1.39288194450954 | 4.10658745131752  | -5.13883041427425 |
| C | -2.49143009352597 | 4.70151166137301  | -5.77824900569768 |
| C | -0.12347018276347 | 4.65963429276571  | -5.35052942217576 |
| C | -2.32651777599509 | 5.79983924165472  | -6.61260034019381 |
| H | -3.47941492086960 | 4.27909262854323  | -5.63436211559894 |
| C | 0.05166630050357  | 5.77088268895475  | -6.17532434652785 |
| H | 0.73659647042103  | 4.21489015434323  | -4.85947946834166 |
| C | -1.05055035056362 | 6.34248845390486  | -6.81355190227944 |
| H | -3.17742113582501 | 6.24075406117137  | -7.12146222118832 |
| H | 1.03694549977491  | 6.20058745169612  | -6.32379307504613 |
| N | -0.87915677217162 | 7.46903725356912  | -7.66617551218929 |

|   |                   |                   |                    |
|---|-------------------|-------------------|--------------------|
| C | -1.52635638451749 | 8.69821187447682  | -7.53509512747717  |
| C | -0.02896303547685 | 7.53273862079217  | -8.77132382371037  |
| C | -1.08612035862611 | 9.56562631356768  | -8.56946440266237  |
| C | -2.44558034677189 | 9.11728043547399  | -6.56885207916349  |
| C | -0.12978510813672 | 8.82107399053003  | -9.35893880682177  |
| C | 0.79891623443075  | 6.54341064129201  | -9.30984721908494  |
| C | -1.59261956477944 | 10.86833060825823 | -8.63966000103528  |
| C | -2.93292198593577 | 10.41916372874687 | -6.66151248289194  |
| H | -2.76235264312123 | 8.44967555259848  | -5.77530400693106  |
| C | 0.62898646762700  | 9.12211267535334  | -10.49585791820961 |
| C | 1.54214783671424  | 6.86932393398294  | -10.44212324566654 |
| H | 0.85218297981696  | 5.55745542920008  | -8.86184330664950  |
| C | -2.51636720150917 | 11.28846759457562 | -7.68640371163920  |
| H | -1.26398809288323 | 11.54068462228271 | -9.42738082677665  |
| H | -3.64904488620184 | 10.76871770062357 | -5.92327703469565  |
| C | 1.46457967318631  | 8.14523533398443  | -11.03037043332436 |
| H | 0.56113102560246  | 10.10506088649992 | -10.95389743902608 |
| H | 2.19349209751984  | 6.11837423260554  | -10.88005012698142 |
| H | -2.91839815576475 | 12.29624328058030 | -7.73049401998331  |
| H | 2.05978347473435  | 8.36600727891661  | -11.91139662221670 |

**XYZ Coordinates of *pCz2i* in T<sub>1</sub> optimized geometry**

|   |                   |                   |                   |
|---|-------------------|-------------------|-------------------|
| N | -0.54490212423495 | 1.82798984855110  | 0.48334597533884  |
| C | -1.50078853332827 | 0.80062712002321  | 0.48521649591685  |
| C | -2.09145606277685 | 0.41911330179990  | -0.80840499589731 |
| C | -1.87161388436406 | 1.25794604587014  | -1.91963446162613 |
| C | -0.94435225460057 | 2.33478230637629  | -1.85442961022995 |
| C | -0.20842189524995 | 2.62503140507523  | -0.61964964108897 |
| C | -2.98453459704451 | -0.72091889281885 | -0.93276668673498 |
| C | -0.75245059011549 | 3.17575066376168  | -2.95616875844064 |

|   |                   |                   |                   |
|---|-------------------|-------------------|-------------------|
| O | -1.79734047670578 | 0.27182129926599  | 1.55945540717418  |
| O | 0.63431455033582  | 3.51815919503899  | -0.53487758620784 |
| H | -0.08421540630109 | 4.01813195731898  | -2.81923386333346 |
| C | -2.57178549122320 | 1.04780174400607  | -3.15858764676628 |
| C | -2.35406069145514 | 1.88784050424850  | -4.26818042121163 |
| C | -2.95551907215217 | 1.51536077679959  | -5.56057479503964 |
| N | -3.91212382176149 | 0.48832322050676  | -5.55769019329719 |
| C | -4.23885055802619 | -0.31677674417439 | -4.45777215391734 |
| C | -3.49901249476817 | -0.03012809362633 | -3.22444476310621 |
| C | -3.68433480512853 | -0.87591130734663 | -2.12624564132595 |
| H | -4.34619762188389 | -1.72237050592809 | -2.26831618956355 |
| O | -5.07856390039999 | -1.21288610093921 | -4.54317098361812 |
| O | -2.66576941922941 | 2.05098442100874  | -6.63208862447193 |
| C | -1.45294426648539 | 3.01940847308884  | -4.14832180297544 |
| C | -4.53680933984706 | 0.19251649957364  | -6.85091572911299 |
| H | -5.31528694083191 | -0.54759297040242 | -6.68335203476440 |
| H | -4.95219686167798 | 1.10949848493988  | -7.27250202536490 |
| H | -3.78861728967592 | -0.19133960809443 | -7.54883785459870 |
| C | 0.07027746858342  | 2.13220357992244  | 1.77907847525164  |
| H | 0.48875122713321  | 1.21940030564816  | 2.20688571169622  |
| H | 0.84573749150433  | 2.87581741072476  | 1.61302350880499  |
| H | -0.68439119226357 | 2.51447222268098  | 2.47081516145034  |
| C | -3.12496958665245 | -1.78081433684177 | 0.07587558481385  |
| C | -4.38868899154376 | -2.35571042398986 | 0.32962796605408  |
| C | -2.00705578756125 | -2.33380013835441 | 0.74055313787712  |
| C | -4.53792652453322 | -3.41130127516633 | 1.21648219725920  |
| H | -5.26882905323691 | -1.93038713352297 | -0.14110375745916 |
| C | -2.14340334159080 | -3.40089708786120 | 1.60996915471347  |
| H | -1.02002251407976 | -1.93778883533467 | 0.53901558278921  |



|   |                   |                   |                   |
|---|-------------------|-------------------|-------------------|
| C | -3.41350443736972 | -3.94576546207612 | 1.86736357565255  |
| H | -5.52303438678084 | -3.80390650371942 | 1.44286647273113  |
| H | -1.27045516069847 | -3.83982542460494 | 2.08002832930537  |
| N | -3.55643531632632 | -5.01179937155358 | 2.77683031049759  |
| C | -4.28036405424121 | -6.19241415534788 | 2.55370270810478  |
| C | -2.99650727426983 | -5.07082490358217 | 4.06249581204956  |
| C | -4.17959534784598 | -7.01520542226039 | 3.70373881683319  |
| C | -4.96217396581904 | -6.61267965940914 | 1.40839426472224  |
| C | -3.36483738374541 | -6.29947915713852 | 4.66548148520763  |
| C | -2.24920109332390 | -4.11012220922318 | 4.74977107209951  |
| C | -4.79911533472268 | -8.26682770425596 | 3.71478428365948  |
| C | -5.57626866332150 | -7.86416719228826 | 1.44511452009450  |
| H | -5.00265081734275 | -5.99589164367837 | 0.51818736837281  |
| C | -2.94715746659982 | -6.58323219045078 | 5.96777156131987  |
| C | -1.84225251717239 | -4.41754062615373 | 6.04750384728983  |
| H | -2.00567939121479 | -3.15516230728826 | 4.29865214092911  |
| C | -5.50276525713954 | -8.68240585019836 | 2.58460887440783  |
| H | -4.72524388928189 | -8.90716936884945 | 4.58874868120643  |
| H | -6.11591631990081 | -8.21311831894318 | 0.57001176171301  |
| C | -2.17887202821669 | -5.64092718222610 | 6.65077483565342  |
| H | -3.22600077941881 | -7.52014533126330 | 6.44090224955723  |
| H | -1.25844703638367 | -3.68992133239924 | 6.60287244966576  |
| H | -5.99084895877331 | -9.65199815867676 | 2.57989792119835  |
| H | -1.84548005442894 | -5.84835548761144 | 7.66282560882893  |
| C | -1.30095632007936 | 4.07625143964632  | -5.16293000539016 |
| C | -2.41707085460215 | 4.67497531984767  | -5.78611834974489 |
| C | -0.02539921129543 | 4.60147479839619  | -5.45043999664480 |
| C | -2.26768203883949 | 5.74919678345472  | -6.64690316832252 |
| H | -3.40832369237912 | 4.28816458594020  | -5.58512990416965 |

|   |                   |                   |                    |
|---|-------------------|-------------------|--------------------|
| C | 0.13599190878711  | 5.66741154884720  | -6.32477747857796  |
| H | 0.84918179827289  | 4.15606379570742  | -4.98758044096441  |
| C | -0.98690139910907 | 6.25452737493636  | -6.92856367415331  |
| H | -3.13263071294770 | 6.18889868302415  | -7.13083737929716  |
| H | 1.12315810123397  | 6.06811599603002  | -6.52678791059428  |
| N | -0.83056992976938 | 7.34763029933447  | -7.80635225743322  |
| C | -1.54048199116083 | 8.55616085586466  | -7.74628945480472  |
| C | 0.07927454001210  | 7.42127746298962  | -8.87106800634059  |
| C | -1.07832119545517 | 9.41074283998641  | -8.77873307209954  |
| C | -2.50908995259616 | 8.97298863296850  | -6.82908852647941  |
| C | -0.04737692125104 | 8.68727082593104  | -9.49608112208391  |
| C | 0.95749027375276  | 6.44817006578700  | -9.35606538411152  |
| C | -1.62135155878804 | 10.69090438510974 | -8.91180903671658  |
| C | -3.03658566615518 | 10.25435358145724 | -6.98310491887294  |
| H | -2.83309922258118 | 8.32931297095809  | -6.01977834567352  |
| C | 0.74744456865824  | 8.99392262402704  | -10.60319629178420 |
| C | 1.74092722008312  | 6.77822445460584  | -10.46105413625615 |
| H | 1.01862573995063  | 5.46753501054580  | -8.89879177240327  |
| C | -2.60509176835558 | 11.10487685636862 | -8.01456079562522  |
| H | -1.27524122550592 | 11.35392508660071 | -9.69925498457340  |
| H | -3.79315806979260 | 10.60056521039375 | -6.28555436124376  |
| C | 1.64533366934105  | 8.03772194928582  | -11.07629205867051 |
| H | 0.66052858440203  | 9.96065147872397  | -11.09041020312665 |
| H | 2.43376762981175  | 6.04123399295095  | -10.85554738366062 |
| H | -3.03774422172732 | 12.09611976109340 | -8.10746492430327  |
| H | 2.27053650559645  | 8.26318796055722  | -11.93457774596510 |

## References

1. A. D. Becke, *J. Chem. Phys.*, 1993, **98**, 5648-5652
2. C. T. Lee, W. T. Yang and R. G., *Phys. Rev. B*, 1988, **37**, 785
3. Neese F., *WIREs ComputMol Sci.* 2022, **12**, 1606
4. T. Lu and F. Chen, *J. Comput. Chem.*, 2012, **33**, 580
5. L. Liu, Q. Wei, Y. Cheng, H. Ma, S. Xiong and X. Zhang, *J. Mater. Chem. C* 2020, **8**, 5839–5846.
6. A. Einstein, *Phys. Z., The Quantum Theory of Radiation*, 1917, **18**, 124
7. V. Lawetz, G. Orlandi and W. Siebrand, *J. Chem. Phys.*, 1972, **56**, 4058
8. G. W. Robinson and R. P. Frosch, *J. Chem. Phys.*, 1963, **38**, 1187
9. M. J. Thapa, W. Fang and J. O. Richardson, *J. Chem. Phys.*, 2019, **150**, 104107
10. V. Balzani, A. Juris, M. Venturi, S. Campagna and S. Serroni, *Chem. Rev.*, 1996, **96**, 759
11. D. Beljonne, Z. Shuai, G. Pourtois and J. L. Bre 'das, *J. Phys. Chem. A*, 2001, **105**, 3899
12. A. Velardo, R. Borrelli, A. Peluso and A. Capobianco, *J. Phys. Chem. C*, 2016, **120**, 24605
13. P. K. Samanta, D. Kim, V. Coropceanu and J. L. Bre 'das, *J. Am. Chem. Soc.*, 2017, **139**, 4042
14. K. V. Mikkelsen and M. A. Ratner, *Chem. Rev.*, 1987, **87**, 113.
